# Supplementary material for: Bioinformatic Analysis of the Proteome in Exosomes Derived From Plasma: Exosomes Involved in Cholesterol Metabolism Process of Patients With Spinal Cord Injury in the Acute Phase
Source: Front Neuroinform. 2021 Jul 9;15:662967. doi: 10.3389/fninf.2021.662967 (PMC8299276; doi:10.3389/fninf.2021.662967)
Supplement: Supplementary file 1 [file Data_Sheet_1.xlsx]

## Sheet: Sheet1
Protein accession	Protein description	Sbef48h/Cbef48h Ratio	Regulated Type	Sbef48h/Cbef48h P value	Gene name	MW [kDa]	Cbef48h_1	Cbef48h_2	Cbef48h_3	Sbef48h_1	Sbef48h_2	Sbef48h_3	Subcellular localization	Biological Process	Cellular Component	Molecular Function	KEGG KO No.	KEGG Gene	KEGG pathway	IPR ID	Domain description
P02656	Apolipoprotein C-III OS=Homo sapiens OX=9606 GN=APOC3 PE=1 SV=1	0.833	Down	0.026377	APOC3	10.852	1.054	0.936	1.024	0.815	0.794	0.903	extracellular	GO:0060627 regulation of vesicle-mediated transport; GO:0044700 single organism signaling; GO:0044085 cellular component biogenesis; GO:0065008 regulation of biological quality; GO:0032371 regulation of sterol transport; GO:0034379 very-low-density lipoprotein particle assembly; GO:0044255 cellular lipid metabolic process; GO:0070328 triglyceride homeostasis; GO:0019216 regulation of lipid metabo…	GO:0005615 extracellular space; GO:0044421 extracellular region part; GO:0031410 cytoplasmic vesicle; GO:0005737 cytoplasm; GO:0031982 vesicle; GO:0034358 plasma lipoprotein particle; GO:0034385 triglyceride-rich plasma lipoprotein particle; GO:0032991 macromolecular complex; GO:0044424 intracellular part; GO:0005623 cell; GO:0034361 very-low-density lipoprotein particle; GO:0005769 early endosom…	GO:0015485 cholesterol binding; GO:0032934 sterol binding; GO:0055102 lipase inhibitor activity; GO:0070653 high-density lipoprotein particle receptor binding; GO:0005102 receptor binding; GO:0043167 ion binding; GO:0005515 protein binding; GO:0098772 molecular function regulator; GO:0004857 enzyme inhibitor activity; GO:0005496 steroid binding; GO:0097159 organic cyclic compound binding; GO:0070…	K08759	APOC3; apolipoprotein C-III	hsa03320 PPAR signaling pathway - Homo sapiens (human); hsa04979 Cholesterol metabolism - Homo sapiens (human);
Q02985	Complement factor H-related protein 3 OS=Homo sapiens OX=9606 GN=CFHR3 PE=1 SV=2	1.972	Up	0.0022399	CFHR3	37.323	0.67	0.853	0.7	1.608	1.483	1.293	extracellular		GO:0070062 extracellular exosome; GO:0043226 organelle; GO:0072562 blood microparticle; GO:0005615 extracellular space; GO:0044421 extracellular region part; GO:0031982 vesicle; GO:1903561 extracellular vesicle; GO:0043227 membrane-bounded organelle; GO:0005576 extracellular region; GO:0043230 extracellular organelle;					IPR000436;	Sushi/SCR/CCP domain;
P02675	Fibrinogen beta chain OS=Homo sapiens OX=9606 GN=FGB PE=1 SV=2	1.381	Up	0.000139431	FGB	55.928	0.795	0.803	0.789	1.145	1.063	1.088	extracellular	GO:0044085 cellular component biogenesis; GO:0044700 single organism signaling; GO:0010941 regulation of cell death; GO:0098542 defense response to other organism; GO:0002793 positive regulation of peptide secretion; GO:0070555 response to interleukin-1; GO:0031347 regulation of defense response; GO:0043152 induction of bacterial agglutination; GO:0009607 response to biotic stimulus; GO:0042730 f…	GO:0034774 secretory granule lumen; GO:0016020 membrane; GO:0005615 extracellular space; GO:0044421 extracellular region part; GO:0005938 cell cortex; GO:0009897 external side of plasma membrane; GO:0031410 cytoplasmic vesicle; GO:0071944 cell periphery; GO:0031982 vesicle; GO:0005737 cytoplasm; GO:0099568 cytoplasmic region; GO:0044433 cytoplasmic vesicle part; GO:0032991 macromolecular complex;…	GO:0030674 protein binding, bridging; GO:0051087 chaperone binding; GO:0005102 receptor binding; GO:0005488 binding; GO:0005515 protein binding; GO:0060090 binding, bridging; GO:0005198 structural molecule activity;	K03904	FGB; fibrinogen beta chain	hsa04610 Complement and coagulation cascades - Homo sapiens (human); hsa04611 Platelet activation - Homo sapiens (human);	IPR002181; IPR012290; IPR014716; IPR014715;	Fibrinogen, alpha/beta/gamma chain, C-terminal globular domain; Fibrinogen, alpha/beta/gamma chain, coiled coil domain; Fibrinogen, alpha/beta/gamma chain, C-terminal globular, subdomain 1; Fibrinogen, alpha/beta/gamma chain, C-terminal globular, subdomain 2;
P30101	Protein disulfide-isomerase A3 OS=Homo sapiens OX=9606 GN=PDIA3 PE=1 SV=4	0.823	Down	0.026504	PDIA3	56.782	1.055	0.934	1.053	0.897	0.825	0.782	endoplasmic reticulum	GO:0044700 single organism signaling; GO:0010941 regulation of cell death; GO:0065008 regulation of biological quality; GO:0072594 establishment of protein localization to organelle; GO:0017038 protein import; GO:0023051 regulation of signaling; GO:0044699 single-organism process; GO:0051169 nuclear transport; GO:2001238 positive regulation of extrinsic apoptotic signaling pathway; GO:0015031 pro…	GO:0016020 membrane; GO:0044421 extracellular region part; GO:0005783 endoplasmic reticulum; GO:0031090 organelle membrane; GO:0031410 cytoplasmic vesicle; GO:0030054 cell junction; GO:0031982 vesicle; GO:0005737 cytoplasm; GO:0044433 cytoplasmic vesicle part; GO:0055038 recycling endosome membrane; GO:0044424 intracellular part; GO:0005623 cell; GO:0044422 organelle part; GO:0055037 recycling en…	GO:0003723 RNA binding; GO:0008233 peptidase activity; GO:0004629 phospholipase C activity; GO:0008234 cysteine-type peptidase activity; GO:0005515 protein binding; GO:0016787 hydrolase activity; GO:0003756 protein disulfide isomerase activity; GO:0016298 lipase activity; GO:0016491 oxidoreductase activity; GO:0004175 endopeptidase activity; GO:0015036 disulfide oxidoreductase activity; GO:190136…	K08056	PDIA3, GRP58; protein disulfide isomerase family A, member 3 [EC:5.3.4.1]	hsa04141 Protein processing in endoplasmic reticulum - Homo sapiens (human); hsa04612 Antigen processing and presentation - Homo sapiens (human); hsa05163 Human cytomegalovirus infection - Homo sapiens (human); hsa05169 Epstein-Barr virus infection - Homo sapiens (human); hsa05170 Human immunodeficiency virus 1 infection - Homo sapiens (human);	IPR005788; IPR012336; IPR013766;	Disulphide isomerase; Thioredoxin-like fold; Thioredoxin domain;
P49221	Protein-glutamine gamma-glutamyltransferase 4 OS=Homo sapiens OX=9606 GN=TGM4 PE=1 SV=2	0.446	Down	0.00073896	TGM4	77.144	1.497	1.508		0.656	0.685		cytoplasm	GO:0008152 metabolic process; GO:0044260 cellular macromolecule metabolic process; GO:0044267 cellular protein metabolic process; GO:0018149 peptide cross-linking; GO:0006464 cellular protein modification process; GO:0043170 macromolecule metabolic process; GO:0019538 protein metabolic process; GO:0036211 protein modification process; GO:0043412 macromolecule modification; GO:0044238 primary meta…	GO:0043229 intracellular organelle; GO:0044421 extracellular region part; GO:0005737 cytoplasm; GO:0031982 vesicle; GO:0012505 endomembrane system; GO:0044424 intracellular part; GO:0005623 cell; GO:0005576 extracellular region; GO:0043231 intracellular membrane-bounded organelle; GO:0043226 organelle; GO:0070062 extracellular exosome; GO:0031012 extracellular matrix; GO:0005622 intracellular; GO…	GO:0016746 transferase activity, transferring acyl groups; GO:0003824 catalytic activity; GO:0005488 binding; GO:0043167 ion binding; GO:0043169 cation binding; GO:0046872 metal ion binding; GO:0016740 transferase activity; GO:0003810 protein-glutamine gamma-glutamyltransferase activity; GO:0016755 transferase activity, transferring amino-acyl groups;	K05621	TGM4; transglutaminase 4 [EC:2.3.2.13]		IPR008958; IPR013783; IPR002931; IPR014756; IPR001102;	Transglutaminase, C-terminal; Immunoglobulin-like fold; Transglutaminase-like; Immunoglobulin E-set; Transglutaminase, N-terminal;
A0A0A0MRZ8	Immunoglobulin kappa variable 3D-11 OS=Homo sapiens OX=9606 GN=IGKV3D-11 PE=3 SV=6	0.701	Down	0.0061157	IGKV3D-11	12.625	1.339	1.23	1.205	0.798	0.87	0.979	extracellular	GO:0002376 immune system process; GO:0006955 immune response; GO:0050896 response to stimulus; GO:0002377 immunoglobulin production; GO:0002440 production of molecular mediator of immune response; GO:0002250 adaptive immune response;	GO:0016020 membrane; GO:0005615 extracellular space; GO:0044421 extracellular region part; GO:0044464 cell part; GO:0071944 cell periphery; GO:0005623 cell; GO:0005576 extracellular region; GO:0005886 plasma membrane;	GO:0005515 protein binding; GO:0003823 antigen binding; GO:0005488 binding;				IPR007110; IPR013783; IPR003599; IPR013106;	Immunoglobulin-like domain; Immunoglobulin-like fold; Immunoglobulin subtype; Immunoglobulin V-set domain;
P0DOX5	Immunoglobulin gamma-1 heavy chain OS=Homo sapiens OX=9606 PE=1 SV=2	0.768	Down	0.0022841	---	49.328	1.17	1.159	1.125	0.887	0.939	0.828	mitochondria			GO:0005515 protein binding; GO:0005488 binding;				IPR007110; IPR013783; IPR003599; IPR013106; IPR003597;	Immunoglobulin-like domain; Immunoglobulin-like fold; Immunoglobulin subtype; Immunoglobulin V-set domain; Immunoglobulin C1-set;
P80723	Brain acid soluble protein 1 OS=Homo sapiens OX=9606 GN=BASP1 PE=1 SV=2	0.47	Down	0.0038009	BASP1	22.693	1.276	0.943	1.092	0.57	0.43	0.555	nucleus	GO:0022414 reproductive process; GO:0035282 segmentation; GO:0007420 brain development; GO:0045927 positive regulation of growth; GO:0048857 neural nucleus development; GO:0021762 substantia nigra development; GO:0051240 positive regulation of multicellular organismal process; GO:0044702 single organism reproductive process; GO:0010558 negative regulation of macromolecule biosynthetic process; GO…	GO:0016020 membrane; GO:0044421 extracellular region part; GO:0071944 cell periphery; GO:0030054 cell junction; GO:0005737 cytoplasm; GO:0031982 vesicle; GO:0030426 growth cone; GO:0044424 intracellular part; GO:0016604 nuclear body; GO:0005623 cell; GO:0044422 organelle part; GO:0043228 non-membrane-bounded organelle; GO:0031974 membrane-enclosed lumen; GO:0005856 cytoskeleton; GO:0070062 extrac…	GO:0097159 organic cyclic compound binding; GO:0000975 regulatory region DNA binding; GO:1901363 heterocyclic compound binding; GO:0003677 DNA binding; GO:0001067 regulatory region nucleic acid binding; GO:0003714 transcription corepressor activity; GO:0044212 transcription regulatory region DNA binding; GO:0005488 binding; GO:0003676 nucleic acid binding; GO:0000989 transcription factor activity…	K17272	BASP1; brain acid soluble protein 1
P19823	Inter-alpha-trypsin inhibitor heavy chain H2 OS=Homo sapiens OX=9606 GN=ITIH2 PE=1 SV=2	0.701	Down	1.7591e-06	ITIH2	106.46	1.018	1.002	0.997	0.715	0.702	0.697	extracellular	GO:0050794 regulation of cellular process; GO:0010951 negative regulation of endopeptidase activity; GO:0060255 regulation of macromolecule metabolic process; GO:0048523 negative regulation of cellular process; GO:0048519 negative regulation of biological process; GO:0031324 negative regulation of cellular metabolic process; GO:0051346 negative regulation of hydrolase activity; GO:0030203 glycosa…	GO:0070062 extracellular exosome; GO:0043226 organelle; GO:0072562 blood microparticle; GO:0005615 extracellular space; GO:0044421 extracellular region part; GO:0031982 vesicle; GO:1903561 extracellular vesicle; GO:0043227 membrane-bounded organelle; GO:0005576 extracellular region; GO:0043230 extracellular organelle;	GO:0004867 serine-type endopeptidase inhibitor activity; GO:0030234 enzyme regulator activity; GO:0030414 peptidase inhibitor activity; GO:0061134 peptidase regulator activity; GO:0061135 endopeptidase regulator activity; GO:0098772 molecular function regulator; GO:0004857 enzyme inhibitor activity; GO:0004866 endopeptidase inhibitor activity;	K19015	ITIH2, SHAP; inter-alpha-trypsin inhibitor heavy chain H2		IPR010600; IPR013694; IPR002035;	Inter-alpha-trypsin inhibitor heavy chain, C-terminal; VIT domain; von Willebrand factor, type A;
P02741	C-reactive protein OS=Homo sapiens OX=9606 GN=CRP PE=1 SV=1	1.648	Up	0.0192758	CRP	25.038	1.596	1.377	1.25	2.309	2.334	2.318	extracellular	GO:0032930 positive regulation of superoxide anion generation; GO:0051093 negative regulation of developmental process; GO:0065008 regulation of biological quality; GO:0098542 defense response to other organism; GO:0051046 regulation of secretion; GO:0044699 single-organism process; GO:0051234 establishment of localization; GO:0006909 phagocytosis; GO:0009607 response to biotic stimulus; GO:00977…	GO:0070062 extracellular exosome; GO:0043226 organelle; GO:0005615 extracellular space; GO:0044421 extracellular region part; GO:0031982 vesicle; GO:1903561 extracellular vesicle; GO:0043227 membrane-bounded organelle; GO:0005576 extracellular region; GO:0043230 extracellular organelle;	GO:0070405 ammonium ion binding; GO:0005102 receptor binding; GO:0001849 complement component C1q binding; GO:0001846 opsonin binding; GO:0033265 choline binding; GO:0044877 macromolecular complex binding; GO:0043167 ion binding; GO:0071813 lipoprotein particle binding; GO:0005515 protein binding; GO:0070325 lipoprotein particle receptor binding; GO:0030169 low-density lipoprotein particle bindin…	K16143	CRP; C-reactive protein		IPR013320;	Concanavalin A-like lectin/glucanase domain;
Q07954	Prolow-density lipoprotein receptor-related protein 1 OS=Homo sapiens OX=9606 GN=LRP1 PE=1 SV=2	0.745	Down	0.00166216	LRP1	504.6	1.118	1.123	1.123	0.831	0.854	0.82	plasma membrane	GO:0044700 single organism signaling; GO:0007205 protein kinase C-activating G-protein coupled receptor signaling pathway; GO:0010941 regulation of cell death; GO:0032371 regulation of sterol transport; GO:0007420 brain development; GO:0043523 regulation of neuron apoptotic process; GO:0044255 cellular lipid metabolic process; GO:0021987 cerebral cortex development; GO:0044237 cellular metabolic …	GO:0016020 membrane; GO:0030425 dendrite; GO:0031090 organelle membrane; GO:0005737 cytoplasm; GO:0044433 cytoplasmic vesicle part; GO:0043025 neuronal cell body; GO:0032991 macromolecular complex; GO:0005887 integral component of plasma membrane; GO:0005623 cell; GO:0044422 organelle part; GO:0043228 non-membrane-bounded organelle; GO:0005765 lysosomal membrane; GO:0005925 focal adhesion; GO:003…	GO:0003723 RNA binding; GO:0008565 protein transporter activity; GO:0034185 apolipoprotein binding; GO:0005102 receptor binding; GO:0044877 macromolecular complex binding; GO:0043167 ion binding; GO:0038024 cargo receptor activity; GO:0022892 substrate-specific transporter activity; GO:0042954 lipoprotein transporter activity; GO:0005515 protein binding; GO:1901363 heterocyclic compound binding; …	K04550	LRP1, CD91; low-density lipoprotein receptor-related protein 1 (alpha-2-macroglobulin receptor)	hsa04979 Cholesterol metabolism - Homo sapiens (human); hsa05010 Alzheimer disease - Homo sapiens (human); hsa05144 Malaria - Homo sapiens (human);	IPR026823; IPR001881; IPR000742; IPR032485; IPR009030; IPR011042;	Complement Clr-like EGF domain; EGF-like calcium-binding domain; EGF-like domain; Domain of unknown function DUF5050; Growth factor receptor cysteine-rich domain; Six-bladed beta-propeller, TolB-like;
P00748	Coagulation factor XII OS=Homo sapiens OX=9606 GN=F12 PE=1 SV=3	0.805	Down	0.0038364	F12	67.791	1.119	1.159	1.167	0.98	0.872	0.922	extracellular	GO:0002675 positive regulation of acute inflammatory response; GO:0007596 blood coagulation; GO:0065008 regulation of biological quality; GO:0032270 positive regulation of cellular protein metabolic process; GO:0051241 negative regulation of multicellular organismal process; GO:0044699 single-organism process; GO:0016485 protein processing; GO:0031347 regulation of defense response; GO:0042730 fi…	GO:0070062 extracellular exosome; GO:0043226 organelle; GO:0016020 membrane; GO:0005615 extracellular space; GO:0044421 extracellular region part; GO:0044464 cell part; GO:0071944 cell periphery; GO:0031982 vesicle; GO:1903561 extracellular vesicle; GO:0043227 membrane-bounded organelle; GO:0005623 cell; GO:0005576 extracellular region; GO:0043230 extracellular organelle; GO:0005886 plasma membra…	GO:0008233 peptidase activity; GO:0043167 ion binding; GO:0008236 serine-type peptidase activity; GO:0051787 misfolded protein binding; GO:0005515 protein binding; GO:0016787 hydrolase activity; GO:0004175 endopeptidase activity; GO:0004252 serine-type endopeptidase activity; GO:0003824 catalytic activity; GO:0017171 serine hydrolase activity; GO:0005488 binding; GO:0070011 peptidase activity, ac…	K01328	F12; coagulation factor XII (Hageman factor) [EC:3.4.21.38]	hsa04610 Complement and coagulation cascades - Homo sapiens (human);	IPR000083; IPR000001; IPR001881; IPR013806; IPR000742; IPR000562; IPR009003; IPR001254;	Fibronectin, type I; Kringle; EGF-like calcium-binding domain; Kringle-like fold; EGF-like domain; Fibronectin, type II, collagen-binding; Peptidase S1, PA clan; Serine proteases, trypsin domain;
Q14515	SPARC-like protein 1 OS=Homo sapiens OX=9606 GN=SPARCL1 PE=1 SV=2	0.545	Down	9.0336e-08	SPARCL1	75.207	1.158	1.132	1.143	0.621	0.629	0.62	extracellular	GO:0032502 developmental process; GO:0050794 regulation of cellular process; GO:0044700 single organism signaling; GO:0051716 cellular response to stimulus; GO:0007165 signal transduction; GO:0050789 regulation of biological process; GO:0007154 cell communication; GO:0044699 single-organism process; GO:0023052 signaling; GO:0050896 response to stimulus; GO:0048856 anatomical structure development…	GO:0031012 extracellular matrix; GO:0070062 extracellular exosome; GO:0043226 organelle; GO:0005615 extracellular space; GO:0044421 extracellular region part; GO:0031982 vesicle; GO:1903561 extracellular vesicle; GO:0005578 proteinaceous extracellular matrix; GO:0043227 membrane-bounded organelle; GO:0005576 extracellular region; GO:0043230 extracellular organelle;	GO:0005488 binding; GO:0044877 macromolecular complex binding; GO:0043167 ion binding; GO:0043169 cation binding; GO:0046872 metal ion binding; GO:0005515 protein binding; GO:0005518 collagen binding; GO:0005509 calcium ion binding; GO:0050840 extracellular matrix binding; GO:0032403 protein complex binding;				IPR002350; IPR002048; IPR019577; IPR011992; IPR015369; IPR003645;	Kazal domain; EF-hand domain; SPARC/Testican, calcium-binding domain; EF-hand domain pair; Follistatin/Osteonectin EGF domain; Follistatin-like, N-terminal;
P22105	Tenascin-X OS=Homo sapiens OX=9606 GN=TNXB PE=1 SV=4	0.615	Down	0.000135038	TNXB	458.22	1.177	1.101	1.053	0.671	0.687	0.689	extracellular	GO:0044085 cellular component biogenesis; GO:0044707 single-multicellular organism process; GO:0016043 cellular component organization; GO:0071822 protein complex subunit organization; GO:0030199 collagen fibril organization; GO:0048251 elastic fiber assembly; GO:0044236 multicellular organism metabolic process; GO:0044763 single-organism cellular process; GO:0044699 single-organism process; GO:0…	GO:0031012 extracellular matrix; GO:0070062 extracellular exosome; GO:0043226 organelle; GO:0005615 extracellular space; GO:0044421 extracellular region part; GO:0005622 intracellular; GO:0044464 cell part; GO:0031982 vesicle; GO:1903561 extracellular vesicle; GO:0005578 proteinaceous extracellular matrix; GO:0005623 cell; GO:0043227 membrane-bounded organelle; GO:0005576 extracellular region; GO…	GO:0050839 cell adhesion molecule binding; GO:0097367 carbohydrate derivative binding; GO:0005102 receptor binding; GO:0005488 binding; GO:0043167 ion binding; GO:0044877 macromolecular complex binding; GO:0043168 anion binding; GO:0005515 protein binding; GO:0005178 integrin binding; GO:0008201 heparin binding; GO:0005539 glycosaminoglycan binding; GO:1901681 sulfur compound binding; GO:0032403 …	K06252	TN; tenascin	hsa04151 PI3K-Akt signaling pathway - Homo sapiens (human); hsa04510 Focal adhesion - Homo sapiens (human); hsa04512 ECM-receptor interaction - Homo sapiens (human); hsa05165 Human papillomavirus infection - Homo sapiens (human); hsa05206 MicroRNAs in cancer - Homo sapiens (human);	IPR002181; IPR013111; IPR013783; IPR014716; IPR000742; IPR003961; IPR014715;	Fibrinogen, alpha/beta/gamma chain, C-terminal globular domain; EGF-like domain, extracellular; Immunoglobulin-like fold; Fibrinogen, alpha/beta/gamma chain, C-terminal globular, subdomain 1; EGF-like domain; Fibronectin type III; Fibrinogen, alpha/beta/gamma chain, C-terminal globular, subdomain 2;
Q8IUX7	Adipocyte enhancer-binding protein 1 OS=Homo sapiens OX=9606 GN=AEBP1 PE=1 SV=1	0.69	Down	0.031102	AEBP1	130.93	1.151	1.269	1.104	0.744	0.694	0.993	endoplasmic reticulum	GO:0006518 peptide metabolic process; GO:0097659 nucleic acid-templated transcription; GO:0044699 single-organism process; GO:0009058 biosynthetic process; GO:0016485 protein processing; GO:0051253 negative regulation of RNA metabolic process; GO:0044237 cellular metabolic process; GO:2001141 regulation of RNA biosynthetic process; GO:0008152 metabolic process; GO:0019538 protein metabolic proces…	GO:0043229 intracellular organelle; GO:0005615 extracellular space; GO:0044421 extracellular region part; GO:0031982 vesicle; GO:0005737 cytoplasm; GO:0044424 intracellular part; GO:0005623 cell; GO:0005576 extracellular region; GO:0043231 intracellular membrane-bounded organelle; GO:0043226 organelle; GO:0070062 extracellular exosome; GO:0005634 nucleus; GO:0005622 intracellular; GO:0044464 cell…	GO:0000981 RNA polymerase II transcription factor activity, sequence-specific DNA binding; GO:0008233 peptidase activity; GO:0003690 double-stranded DNA binding; GO:0005515 protein binding; GO:0016787 hydrolase activity; GO:0003700 transcription factor activity, sequence-specific DNA binding; GO:0000975 regulatory region DNA binding; GO:1901363 heterocyclic compound binding; GO:0097159 organic cy…	K21392	AEBP1; adipocyte enhancer-binding protein 1		IPR008969; IPR000421; IPR000834; IPR014766; IPR034243; IPR008979;	Carboxypeptidase-like, regulatory domain; Coagulation factor 5/8 C-terminal domain; Peptidase M14, carboxypeptidase A; Carboxypeptidase, regulatory domain; AEBP1/CPX, carboxypeptidase domain; Galactose-binding domain-like;
P16112	Aggrecan core protein OS=Homo sapiens OX=9606 GN=ACAN PE=1 SV=3	0.686	Down	0.018199	ACAN	261.33		1.024	0.966		0.712	0.654	extracellular	GO:0016043 cellular component organization; GO:0044707 single-multicellular organism process; GO:0006024 glycosaminoglycan biosynthetic process; GO:0006026 aminoglycan catabolic process; GO:0044699 single-organism process; GO:0009058 biosynthetic process; GO:0042340 keratan sulfate catabolic process; GO:1901566 organonitrogen compound biosynthetic process; GO:0044237 cellular metabolic process; G…	GO:0043229 intracellular organelle; GO:0044421 extracellular region part; GO:0005737 cytoplasm; GO:0044446 intracellular organelle part; GO:0005796 Golgi lumen; GO:0012505 endomembrane system; GO:0044424 intracellular part; GO:0005623 cell; GO:0005576 extracellular region; GO:0043202 lysosomal lumen; GO:0044422 organelle part; GO:0005775 vacuolar lumen; GO:0031012 extracellular matrix; GO:0031974…	GO:0005201 extracellular matrix structural constituent; GO:0097367 carbohydrate derivative binding; GO:0005488 binding; GO:0043167 ion binding; GO:0005540 hyaluronic acid binding; GO:0030246 carbohydrate binding; GO:0046872 metal ion binding; GO:0043169 cation binding; GO:0005515 protein binding; GO:0005539 glycosaminoglycan binding; GO:0005198 structural molecule activity;	K06792	AGC1, CSPG1; aggrecan 1		IPR007110; IPR016187; IPR003599; IPR000742; IPR016186; IPR001304; IPR000436; IPR033987; IPR013783; IPR013106; IPR000538;	Immunoglobulin-like domain; C-type lectin fold; Immunoglobulin subtype; EGF-like domain; C-type lectin-like/link domain; C-type lectin-like; Sushi/SCR/CCP domain; Aggrecan/versican, C-type lectin-like domain; Immunoglobulin-like fold; Immunoglobulin V-set domain; Link domain;
P02647	Apolipoprotein A-I OS=Homo sapiens OX=9606 GN=APOA1 PE=1 SV=1	0.673	Down	3.8461e-05	APOA1	30.777	1.464	1.432	1.435	1.007	0.961	0.947	extracellular	GO:0044085 cellular component biogenesis; GO:0044700 single organism signaling; GO:0090130 tissue migration; GO:0048732 gland development; GO:0032371 regulation of sterol transport; GO:0006066 alcohol metabolic process; GO:0009891 positive regulation of biosynthetic process; GO:0002698 negative regulation of immune effector process; GO:0044255 cellular lipid metabolic process; GO:0070328 triglyce…	GO:0034774 secretory granule lumen; GO:0016020 membrane; GO:0005783 endoplasmic reticulum; GO:0044421 extracellular region part; GO:0005615 extracellular space; GO:0031410 cytoplasmic vesicle; GO:0071944 cell periphery; GO:0005737 cytoplasm; GO:0031982 vesicle; GO:0034358 plasma lipoprotein particle; GO:0044433 cytoplasmic vesicle part; GO:0034385 triglyceride-rich plasma lipoprotein particle; GO…	GO:0032934 sterol binding; GO:0070405 ammonium ion binding; GO:0005102 receptor binding; GO:0034191 apolipoprotein A-I receptor binding; GO:0005319 lipid transporter activity; GO:0022892 substrate-specific transporter activity; GO:0005515 protein binding; GO:0004857 enzyme inhibitor activity; GO:0098772 molecular function regulator; GO:0005496 steroid binding; GO:0097159 organic cyclic compound b…	K08757	APOA1; apolipoprotein A-I	hsa03320 PPAR signaling pathway - Homo sapiens (human); hsa04975 Fat digestion and absorption - Homo sapiens (human); hsa04977 Vitamin digestion and absorption - Homo sapiens (human); hsa04979 Cholesterol metabolism - Homo sapiens (human); hsa05143 African trypanosomiasis - Homo sapiens (human);
P06276	Cholinesterase OS=Homo sapiens OX=9606 GN=BCHE PE=1 SV=1	1.617	Up	0.0039228	BCHE	68.417	1.081	0.928	0.955	1.527	1.807	1.46	extracellular	GO:0001101 response to acid chemical; GO:0048869 cellular developmental process; GO:0023051 regulation of signaling; GO:0044699 single-organism process; GO:0022008 neurogenesis; GO:0051593 response to folic acid; GO:0044237 cellular metabolic process; GO:0050877 neurological system process; GO:0008285 negative regulation of cell proliferation; GO:0007610 behavior; GO:0019695 choline metabolic pro…	GO:0016020 membrane; GO:0005615 extracellular space; GO:0044421 extracellular region part; GO:0005783 endoplasmic reticulum; GO:0005737 cytoplasm; GO:0044424 intracellular part; GO:0005623 cell; GO:0044422 organelle part; GO:0005641 nuclear envelope lumen; GO:0031974 membrane-enclosed lumen; GO:0031970 organelle envelope lumen; GO:0070013 intracellular organelle lumen; GO:0044464 cell part; GO:00…	GO:0070405 ammonium ion binding; GO:0052689 carboxylic ester hydrolase activity; GO:0004104 cholinesterase activity; GO:0033265 choline binding; GO:0043167 ion binding; GO:0005515 protein binding; GO:0016787 hydrolase activity; GO:0033218 amide binding; GO:0001540 beta-amyloid binding; GO:0042802 identical protein binding; GO:0003824 catalytic activity; GO:0042277 peptide binding; GO:0005488 bind…	K01050	BCHE; cholinesterase [EC:3.1.1.8]		IPR014788; IPR029058; IPR002018;	Acetylcholinesterase, tetramerisation domain; Alpha/Beta hydrolase fold; Carboxylesterase, type B;
P10645	Chromogranin-A OS=Homo sapiens OX=9606 GN=CHGA PE=1 SV=7	0.702	Down	0.00061539	CHGA	50.688	0.647	0.583	0.648	0.445	0.432	0.441	extracellular	GO:0044700 single organism signaling; GO:0002279 mast cell activation involved in immune response; GO:0010941 regulation of cell death; GO:0032762 mast cell cytokine production; GO:0065008 regulation of biological quality; GO:0045321 leukocyte activation; GO:0098542 defense response to other organism; GO:0045933 positive regulation of muscle contraction; GO:1901897 regulation of relaxation of car…	GO:0030658 transport vesicle membrane; GO:0016020 membrane; GO:0005615 extracellular space; GO:0044421 extracellular region part; GO:0031090 organelle membrane; GO:0031410 cytoplasmic vesicle; GO:0031982 vesicle; GO:0005737 cytoplasm; GO:0044433 cytoplasmic vesicle part; GO:0044424 intracellular part; GO:0005623 cell; GO:0044422 organelle part; GO:0005622 intracellular; GO:0044464 cell part; GO:0…		K19990	CHGA; chromogranin-A
A0A075B6P5	Immunoglobulin kappa variable 2-28 OS=Homo sapiens OX=9606 GN=IGKV2-28 PE=3 SV=1	0.144	Down	6.4482e-05	IGKV2-28	12.957	1.67	1.814	1.683	0.289	0.198	0.255	extracellular	GO:0044700 single organism signaling; GO:0016064 immunoglobulin mediated immune response; GO:0051674 localization of cell; GO:0007166 cell surface receptor signaling pathway; GO:0038094 Fc-gamma receptor signaling pathway; GO:0044699 single-organism process; GO:0006909 phagocytosis; GO:0051234 establishment of localization; GO:0006956 complement activation; GO:0007165 signal transduction; GO:0008…	GO:0016020 membrane; GO:0005615 extracellular space; GO:0044421 extracellular region part; GO:0044464 cell part; GO:0071944 cell periphery; GO:0005623 cell; GO:0005576 extracellular region; GO:0005886 plasma membrane;	GO:0004252 serine-type endopeptidase activity; GO:0004175 endopeptidase activity; GO:0008233 peptidase activity; GO:0003824 catalytic activity; GO:0017171 serine hydrolase activity; GO:0005488 binding; GO:0008236 serine-type peptidase activity; GO:0070011 peptidase activity, acting on L-amino acid peptides; GO:0016787 hydrolase activity; GO:0005515 protein binding; GO:0003823 antigen binding;				IPR007110; IPR013783; IPR013106;	Immunoglobulin-like domain; Immunoglobulin-like fold; Immunoglobulin V-set domain;
P01766	Immunoglobulin heavy variable 3-13 OS=Homo sapiens OX=9606 GN=IGHV3-13 PE=1 SV=2	0.722	Down	0.0053983	IGHV3-13	12.506	1.143	1.168	1.051	0.812	0.738	0.878	extracellular	GO:0044700 single organism signaling; GO:0016064 immunoglobulin mediated immune response; GO:0051674 localization of cell; GO:0007166 cell surface receptor signaling pathway; GO:0038094 Fc-gamma receptor signaling pathway; GO:0044699 single-organism process; GO:0006909 phagocytosis; GO:0051234 establishment of localization; GO:0006956 complement activation; GO:0007165 signal transduction; GO:0008…	GO:0016020 membrane; GO:0005615 extracellular space; GO:0044421 extracellular region part; GO:0071944 cell periphery; GO:0031982 vesicle; GO:0005623 cell; GO:0005576 extracellular region; GO:0005886 plasma membrane; GO:0043226 organelle; GO:0070062 extracellular exosome; GO:0072562 blood microparticle; GO:0044464 cell part; GO:1903561 extracellular vesicle; GO:0043227 membrane-bounded organelle; …	GO:0004252 serine-type endopeptidase activity; GO:0004175 endopeptidase activity; GO:0008233 peptidase activity; GO:0003824 catalytic activity; GO:0017171 serine hydrolase activity; GO:0005488 binding; GO:0008236 serine-type peptidase activity; GO:0070011 peptidase activity, acting on L-amino acid peptides; GO:0016787 hydrolase activity; GO:0005515 protein binding; GO:0003823 antigen binding;	K06856	IGH; immunoglobulin heavy chain	hsa04020 Calcium signaling pathway - Homo sapiens (human); hsa04064 NF-kappa B signaling pathway - Homo sapiens (human); hsa04072 Phospholipase D signaling pathway - Homo sapiens (human); hsa04145 Phagosome - Homo sapiens (human); hsa04151 PI3K-Akt signaling pathway - Homo sapiens (human); hsa04640 Hematopoietic cell lineage - Homo sapiens (human); hsa04650 Natural killer cell mediated cytotoxici…	IPR007110; IPR013783; IPR013106;	Immunoglobulin-like domain; Immunoglobulin-like fold; Immunoglobulin V-set domain;
P01023	Alpha-2-macroglobulin OS=Homo sapiens OX=9606 GN=A2M PE=1 SV=3	1.456	Up	4.0146e-06	A2M	163.29	0.866	0.897	0.873	1.298	1.27	1.271	extracellular	GO:0065008 regulation of biological quality; GO:0007596 blood coagulation; GO:0023051 regulation of signaling; GO:0048869 cellular developmental process; GO:0002698 negative regulation of immune effector process; GO:1903318 negative regulation of protein maturation; GO:0045916 negative regulation of complement activation; GO:0044699 single-organism process; GO:0031347 regulation of defense respon…	GO:0034774 secretory granule lumen; GO:0005615 extracellular space; GO:0044421 extracellular region part; GO:0031410 cytoplasmic vesicle; GO:0031982 vesicle; GO:0005737 cytoplasm; GO:0044433 cytoplasmic vesicle part; GO:0044424 intracellular part; GO:0005623 cell; GO:0044422 organelle part; GO:0031974 membrane-enclosed lumen; GO:0070062 extracellular exosome; GO:0031983 vesicle lumen; GO:0070013 …	GO:0005102 receptor binding; GO:0019838 growth factor binding; GO:0060589 nucleoside-triphosphatase regulator activity; GO:0019966 interleukin-1 binding; GO:0030695 GTPase regulator activity; GO:0061134 peptidase regulator activity; GO:0019958 C-X-C chemokine binding; GO:0005515 protein binding; GO:0019956 chemokine binding; GO:0098772 molecular function regulator; GO:0004857 enzyme inhibitor act…	K03910	A2M; alpha-2-macroglobulin	hsa04610 Complement and coagulation cascades - Homo sapiens (human);	IPR002890; IPR011625; IPR009048; IPR014756; IPR001599; IPR008930; IPR019565; IPR011626;	Alpha-2-macroglobulin, N-terminal; Alpha-2-macroglobulin, N-terminal 2; Alpha-macroglobulin, receptor-binding; Immunoglobulin E-set; Alpha-2-macroglobulin; Terpenoid cyclases/protein prenyltransferase alpha-alpha toroid; Alpha-2-macroglobulin, thiol-ester bond-forming; Alpha-macroglobulin complement component;
Q13790	Apolipoprotein F OS=Homo sapiens OX=9606 GN=APOF PE=1 SV=2	0.449	Down	0.0144363	APOF	35.399	1.821	1.367	1.697	0.562	1.009	0.621	extracellular	GO:0008203 cholesterol metabolic process; GO:0006869 lipid transport; GO:1901615 organic hydroxy compound metabolic process; GO:1902652 secondary alcohol metabolic process; GO:0006066 alcohol metabolic process; GO:0044281 small molecule metabolic process; GO:0008202 steroid metabolic process; GO:0044699 single-organism process; GO:1901360 organic cyclic compound metabolic process; GO:0071702 orga…	GO:0044421 extracellular region part; GO:0005615 extracellular space; GO:0032994 protein-lipid complex; GO:0034362 low-density lipoprotein particle; GO:1990777 lipoprotein particle; GO:0034358 plasma lipoprotein particle; GO:0032991 macromolecular complex; GO:0034364 high-density lipoprotein particle; GO:0005576 extracellular region;	GO:0097159 organic cyclic compound binding; GO:0015485 cholesterol binding; GO:0032934 sterol binding; GO:0005102 receptor binding; GO:0005488 binding; GO:0043178 alcohol binding; GO:0005319 lipid transporter activity; GO:0008289 lipid binding; GO:0022892 substrate-specific transporter activity; GO:0005515 protein binding; GO:0005496 steroid binding; GO:0005215 transporter activity; GO:0036094 sm…
P49746	Thrombospondin-3 OS=Homo sapiens OX=9606 GN=THBS3 PE=1 SV=1	0.601	Down	0.0065823	THBS3	104.2	1.44	1.63	1.408	0.983	0.747	0.962	extracellular	GO:0044707 single-multicellular organism process; GO:0070977 bone maturation; GO:0021700 developmental maturation; GO:0051216 cartilage development; GO:0061430 bone trabecula morphogenesis; GO:0044699 single-organism process; GO:0098868 bone growth; GO:0048799 animal organ maturation; GO:0035265 organ growth; GO:0009653 anatomical structure morphogenesis; GO:0022610 biological adhesion; GO:006034…	GO:0044464 cell part; GO:0005622 intracellular; GO:0005737 cytoplasm; GO:0048471 perinuclear region of cytoplasm; GO:0044424 intracellular part; GO:0005623 cell; GO:0005576 extracellular region; GO:0044444 cytoplasmic part;	GO:0097367 carbohydrate derivative binding; GO:0005488 binding; GO:0043167 ion binding; GO:0046872 metal ion binding; GO:0043169 cation binding; GO:0005515 protein binding; GO:0043168 anion binding; GO:0005509 calcium ion binding; GO:0008201 heparin binding; GO:0005539 glycosaminoglycan binding; GO:1901681 sulfur compound binding;	K04659	THBS2S; thrombospondin 2/3/4/5	hsa04145 Phagosome - Homo sapiens (human); hsa04151 PI3K-Akt signaling pathway - Homo sapiens (human); hsa04510 Focal adhesion - Homo sapiens (human); hsa04512 ECM-receptor interaction - Homo sapiens (human); hsa05144 Malaria - Homo sapiens (human); hsa05165 Human papillomavirus infection - Homo sapiens (human);	IPR024665; IPR008859; IPR001881; IPR000742; IPR001791; IPR013320;	Thrombospondin/cartilage oligomeric matrix protein, coiled-coil domain; Thrombospondin, C-terminal; EGF-like calcium-binding domain; EGF-like domain; Laminin G domain; Concanavalin A-like lectin/glucanase domain;
A0A075B6I1	Immunoglobulin lambda variable 4-60 OS=Homo sapiens OX=9606 GN=IGLV4-60 PE=3 SV=1	0.489	Down	0.00040166	IGLV4-60	12.987	1.19	1.177	1.22	0.522	0.579	0.654	extracellular	GO:0002376 immune system process; GO:0006955 immune response; GO:0050896 response to stimulus; GO:0002377 immunoglobulin production; GO:0002440 production of molecular mediator of immune response; GO:0002250 adaptive immune response;	GO:0016020 membrane; GO:0005615 extracellular space; GO:0044421 extracellular region part; GO:0044464 cell part; GO:0071944 cell periphery; GO:0005623 cell; GO:0005576 extracellular region; GO:0005886 plasma membrane;	GO:0005515 protein binding; GO:0003823 antigen binding; GO:0005488 binding;	K06553	VPREB, CD179a; pre-B lymphocyte gene		IPR007110; IPR013783; IPR003599; IPR013106;	Immunoglobulin-like domain; Immunoglobulin-like fold; Immunoglobulin subtype; Immunoglobulin V-set domain;
P62258	14-3-3 protein epsilon OS=Homo sapiens OX=9606 GN=YWHAE PE=1 SV=1	0.604	Down	0.027839	YWHAE	29.174	1.408	1.451	1.72	1.139	0.926	0.701	cytoplasm	GO:0044700 single organism signaling; GO:0044085 cellular component biogenesis; GO:0010941 regulation of cell death; GO:0065008 regulation of biological quality; GO:0021766 hippocampus development; GO:0007420 brain development; GO:0060271 cilium assembly; GO:0021987 cerebral cortex development; GO:0044237 cellular metabolic process; GO:0010821 regulation of mitochondrion organization; GO:0015031 …	GO:0016020 membrane; GO:0044421 extracellular region part; GO:0031090 organelle membrane; GO:0031410 cytoplasmic vesicle; GO:0030054 cell junction; GO:0031982 vesicle; GO:0005737 cytoplasm; GO:0044433 cytoplasmic vesicle part; GO:0032991 macromolecular complex; GO:0044424 intracellular part; GO:0005623 cell; GO:0044422 organelle part; GO:0048770 pigment granule; GO:0043228 non-membrane-bounded or…	GO:0016597 amino acid binding; GO:0031625 ubiquitin protein ligase binding; GO:0050815 phosphoserine binding; GO:0005085 guanyl-nucleotide exchange factor activity; GO:0046983 protein dimerization activity; GO:0099106 ion channel regulator activity; GO:0005515 protein binding; GO:0098772 molecular function regulator; GO:0003823 antigen binding; GO:0097159 organic cyclic compound binding; GO:19013…	K06630	YWHAE; 14-3-3 protein epsilon	hsa04110 Cell cycle - Homo sapiens (human); hsa04114 Oocyte meiosis - Homo sapiens (human); hsa04151 PI3K-Akt signaling pathway - Homo sapiens (human); hsa04390 Hippo signaling pathway - Homo sapiens (human); hsa04722 Neurotrophin signaling pathway - Homo sapiens (human); hsa05203 Viral carcinogenesis - Homo sapiens (human);	IPR023410;	14-3-3 domain;
Q02952	A-kinase anchor protein 12 OS=Homo sapiens OX=9606 GN=AKAP12 PE=1 SV=4	0.511	Down	1.83395e-05	AKAP12	191.48	1.414	1.5	1.372	0.742	0.722	0.727	nucleus	GO:0044700 single organism signaling; GO:0023051 regulation of signaling; GO:1902533 positive regulation of intracellular signal transduction; GO:0009891 positive regulation of biosynthetic process; GO:0044699 single-organism process; GO:0015031 protein transport; GO:0030819 positive regulation of cAMP biosynthetic process; GO:0051234 establishment of localization; GO:0006605 protein targeting; G…	GO:0043229 intracellular organelle; GO:0016020 membrane; GO:0005938 cell cortex; GO:0043232 intracellular non-membrane-bounded organelle; GO:0030054 cell junction; GO:0071944 cell periphery; GO:0005737 cytoplasm; GO:0099568 cytoplasmic region; GO:0070161 anchoring junction; GO:0044424 intracellular part; GO:0005829 cytosol; GO:0005623 cell; GO:0005886 plasma membrane; GO:0043228 non-membrane-boun…	GO:0051018 protein kinase A binding; GO:0005515 protein binding; GO:0008179 adenylate cyclase binding; GO:0019899 enzyme binding; GO:0005488 binding;	K16528	AKAP12; A-kinase anchor protein 12		IPR001573; IPR018459;	Protein kinase A anchoring, WSK motif; RII binding domain;
O60437	Periplakin OS=Homo sapiens OX=9606 GN=PPL PE=1 SV=4	0.764	Down	0.0171247	PPL	204.74	1.451		1.436	1.142		1.064	nucleus	GO:0032502 developmental process; GO:0016043 cellular component organization; GO:0044707 single-multicellular organism process; GO:0060429 epithelium development; GO:0043588 skin development; GO:0030216 keratinocyte differentiation; GO:0009888 tissue development; GO:0031424 keratinization; GO:0048731 system development; GO:0070268 cornification; GO:0048869 cellular developmental process; GO:00447…	GO:0043229 intracellular organelle; GO:0016020 membrane; GO:0044421 extracellular region part; GO:0043232 intracellular non-membrane-bounded organelle; GO:0071944 cell periphery; GO:0030054 cell junction; GO:0031982 vesicle; GO:0005737 cytoplasm; GO:0070161 anchoring junction; GO:0044424 intracellular part; GO:0005911 cell-cell junction; GO:0005623 cell; GO:0005829 cytosol; GO:0005576 extracellul…	GO:0050839 cell adhesion molecule binding; GO:0005515 protein binding; GO:0005200 structural constituent of cytoskeleton; GO:0005198 structural molecule activity; GO:0005488 binding; GO:0045296 cadherin binding;	K10386	PPL; periplakin
P78563	Double-stranded RNA-specific editase 1 OS=Homo sapiens OX=9606 GN=ADARB1 PE=1 SV=1	1.743	Up	0.043739	ADARB1	80.762	0.974	1.057		1.967	1.573		nucleus	GO:0044700 single organism signaling; GO:0070997 neuron death; GO:0060415 muscle tissue morphogenesis; GO:0098542 defense response to other organism; GO:0032989 cellular component morphogenesis; GO:0009451 RNA modification; GO:0044237 cellular metabolic process; GO:0050877 neurological system process; GO:0009607 response to biotic stimulus; GO:0008285 negative regulation of cell proliferation; GO…	GO:0043229 intracellular organelle; GO:0043232 intracellular non-membrane-bounded organelle; GO:0005737 cytoplasm; GO:0044446 intracellular organelle part; GO:0031981 nuclear lumen; GO:0044424 intracellular part; GO:0005730 nucleolus; GO:0005829 cytosol; GO:0005623 cell; GO:0044422 organelle part; GO:0043228 non-membrane-bounded organelle; GO:0043226 organelle; GO:0043231 intracellular membrane-b…	GO:0003723 RNA binding; GO:0004000 adenosine deaminase activity; GO:0003725 double-stranded RNA binding; GO:0043167 ion binding; GO:0016787 hydrolase activity; GO:0005515 protein binding; GO:1901363 heterocyclic compound binding; GO:0097159 organic cyclic compound binding; GO:0003729 mRNA binding; GO:0016814 hydrolase activity, acting on carbon-nitrogen (but not peptide) bonds, in cyclic amidines…	K13194	ADARB; double stranded RNA-specific editase B [EC:3.5.-.-]		IPR002466; IPR014720;	Adenosine deaminase/editase; Double-stranded RNA-binding domain;
P35442	Thrombospondin-2 OS=Homo sapiens OX=9606 GN=THBS2 PE=1 SV=2	0.642	Down	0.000118909	THBS2	129.99	1.275	1.243	1.175	0.816	0.769	0.787	extracellular	GO:0050794 regulation of cellular process; GO:2000181 negative regulation of blood vessel morphogenesis; GO:0051093 negative regulation of developmental process; GO:0065008 regulation of biological quality; GO:0050803 regulation of synapse structure or activity; GO:0051965 positive regulation of synapse assembly; GO:0051960 regulation of nervous system development; GO:0051963 regulation of synaps…	GO:0097708 intracellular vesicle; GO:0043229 intracellular organelle; GO:0005615 extracellular space; GO:0044421 extracellular region part; GO:0031410 cytoplasmic vesicle; GO:0005737 cytoplasm; GO:0031982 vesicle; GO:0012505 endomembrane system; GO:0044424 intracellular part; GO:0005623 cell; GO:0044420 extracellular matrix component; GO:0005576 extracellular region; GO:0005604 basement membrane;…	GO:0097367 carbohydrate derivative binding; GO:0005488 binding; GO:0043167 ion binding; GO:0046872 metal ion binding; GO:0043169 cation binding; GO:0005515 protein binding; GO:0043168 anion binding; GO:0005509 calcium ion binding; GO:0008201 heparin binding; GO:0005539 glycosaminoglycan binding; GO:1901681 sulfur compound binding;	K04659	THBS2S; thrombospondin 2/3/4/5	hsa04145 Phagosome - Homo sapiens (human); hsa04151 PI3K-Akt signaling pathway - Homo sapiens (human); hsa04510 Focal adhesion - Homo sapiens (human); hsa04512 ECM-receptor interaction - Homo sapiens (human); hsa05144 Malaria - Homo sapiens (human); hsa05165 Human papillomavirus infection - Homo sapiens (human);	IPR001007; IPR001881; IPR008859; IPR000742; IPR024731; IPR013320; IPR001791;	VWFC domain; EGF-like calcium-binding domain; Thrombospondin, C-terminal; EGF-like domain; EGF domain; Concanavalin A-like lectin/glucanase domain; Laminin G domain;
Q8WWZ8	Oncoprotein-induced transcript 3 protein OS=Homo sapiens OX=9606 GN=OIT3 PE=1 SV=2	2.565	Up	0.000104729	OIT3	60.021	0.506	0.553	0.462	1.368	1.315	1.218	extracellular	GO:1903118 urate homeostasis; GO:0042592 homeostatic process; GO:0065008 regulation of biological quality; GO:0048878 chemical homeostasis; GO:0065007 biological regulation;	GO:0043226 organelle; GO:0043231 intracellular membrane-bounded organelle; GO:0043229 intracellular organelle; GO:0005634 nucleus; GO:0005635 nuclear envelope; GO:0044464 cell part; GO:0005622 intracellular; GO:0031975 envelope; GO:0031967 organelle envelope; GO:0044446 intracellular organelle part; GO:0012505 endomembrane system; GO:0044424 intracellular part; GO:0043227 membrane-bounded organel…	GO:0043169 cation binding; GO:0046872 metal ion binding; GO:0005515 protein binding; GO:0005509 calcium ion binding; GO:0005488 binding; GO:0043167 ion binding;				IPR001881; IPR000742; IPR001507;	EGF-like calcium-binding domain; EGF-like domain; Zona pellucida domain;
Q8NHW5	60S acidic ribosomal protein P0-like OS=Homo sapiens OX=9606 GN=RPLP0P6 PE=5 SV=1	0.321	Down	0.0219	RPLP0P6	34.364	1.978	2.247	1.528	0.764	0.302	0.778	cytoplasm	GO:0044085 cellular component biogenesis; GO:0042254 ribosome biogenesis; GO:0022613 ribonucleoprotein complex biogenesis; GO:0071840 cellular component organization or biogenesis;	GO:0005840 ribosome; GO:0043226 organelle; GO:0043229 intracellular organelle; GO:0043232 intracellular non-membrane-bounded organelle; GO:0044464 cell part; GO:0005622 intracellular; GO:0005737 cytoplasm; GO:0032991 macromolecular complex; GO:0044424 intracellular part; GO:1990904 ribonucleoprotein complex; GO:0005623 cell; GO:0030529 intracellular ribonucleoprotein complex; GO:0044444 cytoplasm…		K02941	RP-LP0, RPLP0; large subunit ribosomal protein LP0	hsa03010 Ribosome - Homo sapiens (human);
P05543	Thyroxine-binding globulin OS=Homo sapiens OX=9606 GN=SERPINA7 PE=1 SV=2	1.221	Up	0.000101688	SERPINA7	46.324	1.187	1.219	1.221	1.482	1.451	1.497	extracellular	GO:0050794 regulation of cellular process; GO:0010951 negative regulation of endopeptidase activity; GO:0065008 regulation of biological quality; GO:0009914 hormone transport; GO:0072337 modified amino acid transport; GO:0060255 regulation of macromolecule metabolic process; GO:0044699 single-organism process; GO:0031324 negative regulation of cellular metabolic process; GO:0048519 negative regul…	GO:0070062 extracellular exosome; GO:0043226 organelle; GO:0005615 extracellular space; GO:0044421 extracellular region part; GO:0031982 vesicle; GO:1903561 extracellular vesicle; GO:0043227 membrane-bounded organelle; GO:0005576 extracellular region; GO:0043230 extracellular organelle;	GO:0004867 serine-type endopeptidase inhibitor activity; GO:0030234 enzyme regulator activity; GO:0030414 peptidase inhibitor activity; GO:0061134 peptidase regulator activity; GO:0061135 endopeptidase regulator activity; GO:0098772 molecular function regulator; GO:0004857 enzyme inhibitor activity; GO:0004866 endopeptidase inhibitor activity;	K20734	SERPINA7, TBG; thyroxine-binding globulin	hsa04918 Thyroid hormone synthesis - Homo sapiens (human);	IPR023796;	Serpin domain;
P02766	Transthyretin OS=Homo sapiens OX=9606 GN=TTR PE=1 SV=1	0.762	Down	0.00021712	TTR	15.887	1.182	1.136	1.14	0.866	0.908	0.86	extracellular	GO:0065008 regulation of biological quality; GO:0009914 hormone transport; GO:0072337 modified amino acid transport; GO:0045321 leukocyte activation; GO:0006066 alcohol metabolic process; GO:0044699 single-organism process; GO:0044255 cellular lipid metabolic process; GO:0044237 cellular metabolic process; GO:0051234 establishment of localization; GO:0008152 metabolic process; GO:0030198 extracel…	GO:0034774 secretory granule lumen; GO:0005615 extracellular space; GO:0044421 extracellular region part; GO:0031410 cytoplasmic vesicle; GO:0031982 vesicle; GO:0005737 cytoplasm; GO:0044433 cytoplasmic vesicle part; GO:0032991 macromolecular complex; GO:0044424 intracellular part; GO:0035578 azurophil granule lumen; GO:0005623 cell; GO:0044422 organelle part; GO:0005775 vacuolar lumen; GO:007006…	GO:0042802 identical protein binding; GO:0046982 protein heterodimerization activity; GO:0005102 receptor binding; GO:0042562 hormone binding; GO:0005488 binding; GO:0005179 hormone activity; GO:0046983 protein dimerization activity; GO:0070324 thyroid hormone binding; GO:0005515 protein binding;	K20731	TTR; transthyretin	hsa04918 Thyroid hormone synthesis - Homo sapiens (human);	IPR023416;	Transthyretin/hydroxyisourate hydrolase, superfamily;
Q8WX92	Negative elongation factor B OS=Homo sapiens OX=9606 GN=NELFB PE=1 SV=1	0.576	Down	8.2922e-05	NELFB	65.697	1.145	1.227	1.24	0.671	0.684	0.725	nucleus	GO:0034244 negative regulation of transcription elongation from RNA polymerase II promoter; GO:0097659 nucleic acid-templated transcription; GO:0009891 positive regulation of biosynthetic process; GO:0009058 biosynthetic process; GO:0006354 DNA-templated transcription, elongation; GO:0044237 cellular metabolic process; GO:0051253 negative regulation of RNA metabolic process; GO:2001141 regulation…	GO:0043229 intracellular organelle; GO:0005737 cytoplasm; GO:0044446 intracellular organelle part; GO:0032991 macromolecular complex; GO:0031981 nuclear lumen; GO:0044424 intracellular part; GO:0005623 cell; GO:0044422 organelle part; GO:0043226 organelle; GO:0043231 intracellular membrane-bounded organelle; GO:0031974 membrane-enclosed lumen; GO:0005654 nucleoplasm; GO:0005634 nucleus; GO:007001…	GO:0097159 organic cyclic compound binding; GO:1901363 heterocyclic compound binding; GO:0003723 RNA binding; GO:0005515 protein binding; GO:0005488 binding; GO:0003676 nucleic acid binding;	K15180	COBRA1, NELFB; negative elongation factor B
P01011	Alpha-1-antichymotrypsin OS=Homo sapiens OX=9606 GN=SERPINA3 PE=1 SV=2	0.662	Down	0.00116296	SERPINA3	47.65	1.092	1.167	1.061	0.79	0.686	0.723	extracellular	GO:0065008 regulation of biological quality; GO:0007586 digestion; GO:0045321 leukocyte activation; GO:0044699 single-organism process; GO:0019216 regulation of lipid metabolic process; GO:0048871 multicellular organismal homeostasis; GO:0030277 maintenance of gastrointestinal epithelium; GO:0051234 establishment of localization; GO:0010466 negative regulation of peptidase activity; GO:0002274 my…	GO:0034774 secretory granule lumen; GO:0005615 extracellular space; GO:0044421 extracellular region part; GO:0031410 cytoplasmic vesicle; GO:0031982 vesicle; GO:0005737 cytoplasm; GO:0044433 cytoplasmic vesicle part; GO:0044424 intracellular part; GO:0035578 azurophil granule lumen; GO:0005623 cell; GO:0044422 organelle part; GO:0005775 vacuolar lumen; GO:0070062 extracellular exosome; GO:0031974…	GO:0097159 organic cyclic compound binding; GO:1901363 heterocyclic compound binding; GO:0003677 DNA binding; GO:0004867 serine-type endopeptidase inhibitor activity; GO:0030234 enzyme regulator activity; GO:0005488 binding; GO:0030414 peptidase inhibitor activity; GO:0061134 peptidase regulator activity; GO:0003676 nucleic acid binding; GO:0061135 endopeptidase regulator activity; GO:0005515 pro…	K04525	SERPINA; serpin peptidase inhibitor, clade A		IPR023796;	Serpin domain;
P15144	Aminopeptidase N OS=Homo sapiens OX=9606 GN=ANPEP PE=1 SV=4	0.429	Down	0.0118196	ANPEP	109.54	1.853		1.61	0.787		0.697	endoplasmic reticulum	GO:0044409 entry into host; GO:0044700 single organism signaling; GO:0065008 regulation of biological quality; GO:0045321 leukocyte activation; GO:0006518 peptide metabolic process; GO:0001568 blood vessel development; GO:0048869 cellular developmental process; GO:0044699 single-organism process; GO:0044764 multi-organism cellular process; GO:0044237 cellular metabolic process; GO:0051234 establi…	GO:0016020 membrane; GO:0005615 extracellular space; GO:0044421 extracellular region part; GO:0009897 external side of plasma membrane; GO:0031410 cytoplasmic vesicle; GO:0031090 organelle membrane; GO:0071944 cell periphery; GO:0031982 vesicle; GO:0005737 cytoplasm; GO:0044433 cytoplasmic vesicle part; GO:0031224 intrinsic component of membrane; GO:0044424 intracellular part; GO:0005623 cell; GO…	GO:0008238 exopeptidase activity; GO:0008233 peptidase activity; GO:0043167 ion binding; GO:0070006 metalloaminopeptidase activity; GO:0008235 metalloexopeptidase activity; GO:0004177 aminopeptidase activity; GO:0008237 metallopeptidase activity; GO:0016787 hydrolase activity; GO:0033218 amide binding; GO:0008270 zinc ion binding; GO:0001618 virus receptor activity; GO:0060089 molecular transduce…	K11140	ANPEP, CD13; aminopeptidase N [EC:3.4.11.2]	hsa00480 Glutathione metabolism - Homo sapiens (human); hsa01100 Metabolic pathways - Homo sapiens (human); hsa04614 Renin-angiotensin system - Homo sapiens (human); hsa04640 Hematopoietic cell lineage - Homo sapiens (human);	IPR014782; IPR024571;	Peptidase M1, membrane alanine aminopeptidase, N-terminal; ERAP1-like C-terminal domain;
P00751	Complement factor B OS=Homo sapiens OX=9606 GN=CFB PE=1 SV=2	0.827	Down	0.00079774	CFB	85.532	1.241	1.22	1.305	1.04	1.045	1.028	extracellular	GO:0030449 regulation of complement activation; GO:2000257 regulation of protein activation cascade; GO:0002252 immune effector process; GO:0060255 regulation of macromolecule metabolic process; GO:0002920 regulation of humoral immune response; GO:0002673 regulation of acute inflammatory response; GO:0006959 humoral immune response; GO:0080134 regulation of response to stress; GO:0050896 response…	GO:0016020 membrane; GO:0005615 extracellular space; GO:0044421 extracellular region part; GO:0071944 cell periphery; GO:0031982 vesicle; GO:0005623 cell; GO:0005576 extracellular region; GO:0005886 plasma membrane; GO:0043226 organelle; GO:0070062 extracellular exosome; GO:0072562 blood microparticle; GO:0044464 cell part; GO:1903561 extracellular vesicle; GO:0043227 membrane-bounded organelle; …	GO:0004252 serine-type endopeptidase activity; GO:0004175 endopeptidase activity; GO:0008233 peptidase activity; GO:0017171 serine hydrolase activity; GO:0003824 catalytic activity; GO:0005488 binding; GO:0008236 serine-type peptidase activity; GO:0001848 complement binding; GO:0070011 peptidase activity, acting on L-amino acid peptides; GO:0005515 protein binding; GO:0016787 hydrolase activity;	K01335	CFB; component factor B [EC:3.4.21.47]	hsa04610 Complement and coagulation cascades - Homo sapiens (human); hsa05150 Staphylococcus aureus infection - Homo sapiens (human);	IPR009003; IPR000436; IPR001254; IPR002035;	Peptidase S1, PA clan; Sushi/SCR/CCP domain; Serine proteases, trypsin domain; von Willebrand factor, type A;
P0DOX8	Immunoglobulin lambda-1 light chain OS=Homo sapiens OX=9606 PE=1 SV=1	2.379	Up	1.5426e-06	---	22.83	0.658	0.7	0.654	1.59	1.621	1.576	nucleus			GO:0005515 protein binding; GO:0005488 binding;				IPR007110; IPR013783; IPR003599; IPR013106; IPR003597;	Immunoglobulin-like domain; Immunoglobulin-like fold; Immunoglobulin subtype; Immunoglobulin V-set domain; Immunoglobulin C1-set;
P36955	Pigment epithelium-derived factor OS=Homo sapiens OX=9606 GN=SERPINF1 PE=1 SV=4	0.825	Down	3.9406e-05	SERPINF1	46.312	1.355	1.381	1.347	1.124	1.11	1.134	plasma membrane	GO:0010941 regulation of cell death; GO:0065008 regulation of biological quality; GO:0022414 reproductive process; GO:0042593 glucose homeostasis; GO:0071384 cellular response to corticosteroid stimulus; GO:0009749 response to glucose; GO:0046685 response to arsenic-containing substance; GO:0031347 regulation of defense response; GO:0010594 regulation of endothelial cell migration; GO:0050877 neu…	GO:0005615 extracellular space; GO:0044421 extracellular region part; GO:0031410 cytoplasmic vesicle; GO:0005737 cytoplasm; GO:0031982 vesicle; GO:0043025 neuronal cell body; GO:0044424 intracellular part; GO:0005623 cell; GO:0044420 extracellular matrix component; GO:0048770 pigment granule; GO:0005604 basement membrane; GO:0070062 extracellular exosome; GO:0043203 axon hillock; GO:0005622 intra…	GO:0004867 serine-type endopeptidase inhibitor activity; GO:0030234 enzyme regulator activity; GO:0005488 binding; GO:0030414 peptidase inhibitor activity; GO:0061134 peptidase regulator activity; GO:0005515 protein binding; GO:0061135 endopeptidase regulator activity; GO:0004857 enzyme inhibitor activity; GO:0098772 molecular function regulator; GO:0004866 endopeptidase inhibitor activity;	K19614	SERPINF1, PEDF; pigment epithelium-derived factor	hsa04310 Wnt signaling pathway - Homo sapiens (human);	IPR033832; IPR023796;	Pigment epithelium derived factor; Serpin domain;
Q96N16	Janus kinase and microtubule-interacting protein 1 OS=Homo sapiens OX=9606 GN=JAKMIP1 PE=1 SV=1	1.576	Up	0.0039977	JAKMIP1	73.208	0.913	0.766	0.772	1.174	1.29	1.4	cytoplasm	GO:0045184 establishment of protein localization; GO:0006810 transport; GO:0003008 system process; GO:0050890 cognition; GO:0071702 organic substance transport; GO:0008104 protein localization; GO:0033036 macromolecule localization; GO:0051179 localization; GO:0032501 multicellular organismal process; GO:0015031 protein transport; GO:0050877 neurological system process; GO:0051234 establishment o…	GO:0043229 intracellular organelle; GO:0016020 membrane; GO:0099513 polymeric cytoskeletal fiber; GO:0005874 microtubule; GO:0019898 extrinsic component of membrane; GO:0043232 intracellular non-membrane-bounded organelle; GO:0044430 cytoskeletal part; GO:0005737 cytoplasm; GO:0044446 intracellular organelle part; GO:0032991 macromolecular complex; GO:0099512 supramolecular fiber; GO:0044424 intr…	GO:0097159 organic cyclic compound binding; GO:1901363 heterocyclic compound binding; GO:0003723 RNA binding; GO:0050811 GABA receptor binding; GO:0008092 cytoskeletal protein binding; GO:0019894 kinesin binding; GO:0005102 receptor binding; GO:0008017 microtubule binding; GO:0005488 binding; GO:0003676 nucleic acid binding; GO:0015631 tubulin binding; GO:0005515 protein binding; GO:0019900 kinas…				IPR031994;	Janus kinase and microtubule-interacting protein, C-terminal domain;
P02748	Complement component C9 OS=Homo sapiens OX=9606 GN=C9 PE=1 SV=2	1.251	Up	0.0020221	C9	63.173	0.724	0.801	0.77	0.936	0.965	0.969	extracellular	GO:0044085 cellular component biogenesis; GO:0065008 regulation of biological quality; GO:0016064 immunoglobulin mediated immune response; GO:0001907 killing by symbiont of host cells; GO:0044764 multi-organism cellular process; GO:0035821 modification of morphology or physiology of other organism; GO:0031347 regulation of defense response; GO:0044004 disruption by symbiont of host cell; GO:00069…	GO:0016020 membrane; GO:0005615 extracellular space; GO:0044421 extracellular region part; GO:0098796 membrane protein complex; GO:0044216 other organism cell; GO:0071944 cell periphery; GO:0031982 vesicle; GO:0005737 cytoplasm; GO:0032991 macromolecular complex; GO:0031224 intrinsic component of membrane; GO:0044424 intracellular part; GO:0005887 integral component of plasma membrane; GO:0005623…	GO:0005515 protein binding; GO:0005488 binding;	K04000	C9; complement component 9	hsa04610 Complement and coagulation cascades - Homo sapiens (human); hsa05020 Prion diseases - Homo sapiens (human); hsa05146 Amoebiasis - Homo sapiens (human); hsa05322 Systemic lupus erythematosus - Homo sapiens (human);	IPR020864; IPR009030;	Membrane attack complex component/perforin (MACPF) domain; Growth factor receptor cysteine-rich domain;
Q9BUN1	Protein MENT OS=Homo sapiens OX=9606 GN=MENT PE=2 SV=1	0.5	Down	0.045436	MENT	36.769	1.017	1.325	0.978	0.329	0.61	0.72	extracellular		GO:0005576 extracellular region;
P06727	Apolipoprotein A-IV OS=Homo sapiens OX=9606 GN=APOA4 PE=1 SV=3	0.8	Down	0.00061956	APOA4	45.398	1.422	1.44	1.366	1.165	1.109	1.109	extracellular	GO:0044085 cellular component biogenesis; GO:0006801 superoxide metabolic process; GO:0065008 regulation of biological quality; GO:0007586 digestion; GO:0032371 regulation of sterol transport; GO:0006066 alcohol metabolic process; GO:0009891 positive regulation of biosynthetic process; GO:0070328 triglyceride homeostasis; GO:0044255 cellular lipid metabolic process; GO:0019216 regulation of lipid…	GO:0005783 endoplasmic reticulum; GO:0005615 extracellular space; GO:0044421 extracellular region part; GO:0031410 cytoplasmic vesicle; GO:0005737 cytoplasm; GO:0031982 vesicle; GO:0034358 plasma lipoprotein particle; GO:0034385 triglyceride-rich plasma lipoprotein particle; GO:0032991 macromolecular complex; GO:0044424 intracellular part; GO:0005623 cell; GO:0034361 very-low-density lipoprotein …	GO:0015485 cholesterol binding; GO:0032934 sterol binding; GO:0070405 ammonium ion binding; GO:0046983 protein dimerization activity; GO:0043167 ion binding; GO:0016209 antioxidant activity; GO:0005319 lipid transporter activity; GO:0022892 substrate-specific transporter activity; GO:0005515 protein binding; GO:0005507 copper ion binding; GO:0098772 molecular function regulator; GO:0005496 steroi…	K08760	APOA4; apolipoprotein A-IV	hsa04975 Fat digestion and absorption - Homo sapiens (human); hsa04977 Vitamin digestion and absorption - Homo sapiens (human); hsa04979 Cholesterol metabolism - Homo sapiens (human);
P67936	Tropomyosin alpha-4 chain OS=Homo sapiens OX=9606 GN=TPM4 PE=1 SV=3	0.497	Down	0.027298	TPM4	28.521	0.892	0.951	0.919	0.568	0.382	0.424	cytoplasm	GO:0030048 actin filament-based movement; GO:0032502 developmental process; GO:0016043 cellular component organization; GO:0001649 osteoblast differentiation; GO:0044707 single-multicellular organism process; GO:0030049 muscle filament sliding; GO:0070252 actin-mediated cell contraction; GO:0003012 muscle system process; GO:0003008 system process; GO:0033275 actin-myosin filament sliding; GO:0001…	GO:0016020 membrane; GO:0044421 extracellular region part; GO:0005938 cell cortex; GO:0030054 cell junction; GO:0071944 cell periphery; GO:0030016 myofibril; GO:0031982 vesicle; GO:0099568 cytoplasmic region; GO:0005737 cytoplasm; GO:0030863 cortical cytoskeleton; GO:0032991 macromolecular complex; GO:0099512 supramolecular fiber; GO:0044424 intracellular part; GO:0099080 supramolecular complex; …	GO:0051015 actin filament binding; GO:0008092 cytoskeletal protein binding; GO:0005488 binding; GO:0043167 ion binding; GO:0044877 macromolecular complex binding; GO:0003779 actin binding; GO:0046872 metal ion binding; GO:0043169 cation binding; GO:0005515 protein binding; GO:0005509 calcium ion binding; GO:0008307 structural constituent of muscle; GO:0005198 structural molecule activity; GO:0032…	K10375	TPM4; tropomyosin 4	hsa04260 Cardiac muscle contraction - Homo sapiens (human); hsa04261 Adrenergic signaling in cardiomyocytes - Homo sapiens (human); hsa05410 Hypertrophic cardiomyopathy (HCM) - Homo sapiens (human); hsa05414 Dilated cardiomyopathy (DCM) - Homo sapiens (human);
A0A075B6H9	Immunoglobulin lambda variable 4-69 OS=Homo sapiens OX=9606 GN=IGLV4-69 PE=1 SV=1	0.759	Down	0.0236	IGLV4-69	12.773	1.224	0.996	1.191	0.824	0.828	0.936	extracellular	GO:0002376 immune system process; GO:0006955 immune response; GO:0050896 response to stimulus; GO:0002377 immunoglobulin production; GO:0002440 production of molecular mediator of immune response; GO:0002250 adaptive immune response;	GO:0016020 membrane; GO:0005615 extracellular space; GO:0044421 extracellular region part; GO:0044464 cell part; GO:0071944 cell periphery; GO:0005623 cell; GO:0005576 extracellular region; GO:0005886 plasma membrane;	GO:0005515 protein binding; GO:0003823 antigen binding; GO:0005488 binding;	K06553	VPREB, CD179a; pre-B lymphocyte gene		IPR007110; IPR013783; IPR013106; IPR003599;	Immunoglobulin-like domain; Immunoglobulin-like fold; Immunoglobulin V-set domain; Immunoglobulin subtype;
P02765	Alpha-2-HS-glycoprotein OS=Homo sapiens OX=9606 GN=AHSG PE=1 SV=1	1.46	Up	0.0090952	AHSG	39.324	1.02	1.099	1.202	1.811	1.581	1.455	extracellular	GO:0060627 regulation of vesicle-mediated transport; GO:0051093 negative regulation of developmental process; GO:0045321 leukocyte activation; GO:0009968 negative regulation of signal transduction; GO:0023051 regulation of signaling; GO:0044699 single-organism process; GO:0051241 negative regulation of multicellular organismal process; GO:0030500 regulation of bone mineralization; GO:0031347 regu…	GO:0034774 secretory granule lumen; GO:0005615 extracellular space; GO:0044421 extracellular region part; GO:0031410 cytoplasmic vesicle; GO:0031982 vesicle; GO:0005737 cytoplasm; GO:0044433 cytoplasmic vesicle part; GO:0044424 intracellular part; GO:0005623 cell; GO:0044422 organelle part; GO:0070062 extracellular exosome; GO:0031974 membrane-enclosed lumen; GO:0031983 vesicle lumen; GO:0070013 …	GO:0030234 enzyme regulator activity; GO:0019210 kinase inhibitor activity; GO:0030414 peptidase inhibitor activity; GO:0061134 peptidase regulator activity; GO:0061135 endopeptidase regulator activity; GO:0019207 kinase regulator activity; GO:0004857 enzyme inhibitor activity; GO:0098772 molecular function regulator; GO:0004866 endopeptidase inhibitor activity; GO:0004869 cysteine-type endopepti…				IPR000010; IPR025760;	Cystatin domain; Fetuin-A-type cystatin domain;
P01024	Complement C3 OS=Homo sapiens OX=9606 GN=C3 PE=1 SV=2	1.299	Up	0.000138742	C3	187.15	0.93	0.878	0.907	1.17	1.193	1.164	endoplasmic reticulum	GO:0044700 single organism signaling; GO:0060627 regulation of vesicle-mediated transport; GO:0065008 regulation of biological quality; GO:0016064 immunoglobulin mediated immune response; GO:0045321 leukocyte activation; GO:0032270 positive regulation of cellular protein metabolic process; GO:0002824 positive regulation of adaptive immune response based on somatic recombination of immune receptor…	GO:0016020 membrane; GO:0034774 secretory granule lumen; GO:0005615 extracellular space; GO:0044421 extracellular region part; GO:0031410 cytoplasmic vesicle; GO:0071944 cell periphery; GO:0031982 vesicle; GO:0005737 cytoplasm; GO:0044433 cytoplasmic vesicle part; GO:0044424 intracellular part; GO:0035578 azurophil granule lumen; GO:0005623 cell; GO:0044422 organelle part; GO:0005775 vacuolar lum…	GO:0008233 peptidase activity; GO:0005102 receptor binding; GO:0008236 serine-type peptidase activity; GO:0061134 peptidase regulator activity; GO:0016787 hydrolase activity; GO:0005515 protein binding; GO:0004857 enzyme inhibitor activity; GO:0098772 molecular function regulator; GO:0004866 endopeptidase inhibitor activity; GO:0031715 C5L2 anaphylatoxin chemotactic receptor binding; GO:0031714 C…	K03990	C3; complement component 3	hsa04145 Phagosome - Homo sapiens (human); hsa04610 Complement and coagulation cascades - Homo sapiens (human); hsa05133 Pertussis - Homo sapiens (human); hsa05134 Legionellosis - Homo sapiens (human); hsa05140 Leishmaniasis - Homo sapiens (human); hsa05142 Chagas disease (American trypanosomiasis) - Homo sapiens (human); hsa05150 Staphylococcus aureus infection - Homo sapiens (human); hsa05152 T…	IPR008993; IPR001599; IPR011626; IPR000020; IPR002890; IPR011625; IPR009048; IPR001134; IPR001840; IPR008930; IPR018933; IPR019565; IPR018081;	Tissue inhibitor of metalloproteinases-like, OB-fold; Alpha-2-macroglobulin; Alpha-macroglobulin complement component; Anaphylatoxin/fibulin; Alpha-2-macroglobulin, N-terminal; Alpha-2-macroglobulin, N-terminal 2; Alpha-macroglobulin, receptor-binding; Netrin domain; Anaphylatoxin, complement system domain; Terpenoid cyclases/protein prenyltransferase alpha-alpha toroid; Netrin module, non-TIMP t…
P35443	Thrombospondin-4 OS=Homo sapiens OX=9606 GN=THBS4 PE=1 SV=2	0.704	Down	0.00023623	THBS4	105.87	1.384	1.331	1.387	0.918	0.997	0.974	extracellular	GO:0051093 negative regulation of developmental process; GO:0030335 positive regulation of cell migration; GO:0032270 positive regulation of cellular protein metabolic process; GO:0051674 localization of cell; GO:0040017 positive regulation of locomotion; GO:0071603 endothelial cell-cell adhesion; GO:0051241 negative regulation of multicellular organismal process; GO:0044699 single-organism proce…	GO:0043229 intracellular organelle; GO:0005615 extracellular space; GO:0044421 extracellular region part; GO:0005783 endoplasmic reticulum; GO:0031982 vesicle; GO:0005737 cytoplasm; GO:0016529 sarcoplasmic reticulum; GO:0012505 endomembrane system; GO:0044424 intracellular part; GO:0016528 sarcoplasm; GO:0005623 cell; GO:0044420 extracellular matrix component; GO:0005576 extracellular region; GO:…	GO:0008083 growth factor activity; GO:0005102 receptor binding; GO:0043167 ion binding; GO:0044877 macromolecular complex binding; GO:0005515 protein binding; GO:0005178 integrin binding; GO:0008201 heparin binding; GO:1901681 sulfur compound binding; GO:0050839 cell adhesion molecule binding; GO:0097367 carbohydrate derivative binding; GO:0005488 binding; GO:0046872 metal ion binding; GO:0043169…	K04659	THBS2S; thrombospondin 2/3/4/5	hsa04145 Phagosome - Homo sapiens (human); hsa04151 PI3K-Akt signaling pathway - Homo sapiens (human); hsa04510 Focal adhesion - Homo sapiens (human); hsa04512 ECM-receptor interaction - Homo sapiens (human); hsa05144 Malaria - Homo sapiens (human); hsa05165 Human papillomavirus infection - Homo sapiens (human);	IPR024665; IPR008859; IPR001881; IPR000742; IPR001791; IPR013320;	Thrombospondin/cartilage oligomeric matrix protein, coiled-coil domain; Thrombospondin, C-terminal; EGF-like calcium-binding domain; EGF-like domain; Laminin G domain; Concanavalin A-like lectin/glucanase domain;
P0DP08	Immunoglobulin heavy variable 4-38-2 OS=Homo sapiens OX=9606 GN=IGHV4-38-2 PE=3 SV=1	2.177	Up	0.00148483	IGHV4-38-2	13.016	0.78	0.796		1.764	1.667		extracellular			GO:0005515 protein binding; GO:0005488 binding;	K06856	IGH; immunoglobulin heavy chain	hsa04020 Calcium signaling pathway - Homo sapiens (human); hsa04064 NF-kappa B signaling pathway - Homo sapiens (human); hsa04072 Phospholipase D signaling pathway - Homo sapiens (human); hsa04145 Phagosome - Homo sapiens (human); hsa04151 PI3K-Akt signaling pathway - Homo sapiens (human); hsa04640 Hematopoietic cell lineage - Homo sapiens (human); hsa04650 Natural killer cell mediated cytotoxici…	IPR007110; IPR013783; IPR013106;	Immunoglobulin-like domain; Immunoglobulin-like fold; Immunoglobulin V-set domain;
P13645	"Keratin, type I cytoskeletal 10 OS=Homo sapiens OX=9606 GN=KRT10 PE=1 SV=6"	1.623	Up	0.0126201	KRT10	58.826	0.642	0.688	0.567	1.198	0.86	1.021	nucleus	GO:0032502 developmental process; GO:0060429 epithelium development; GO:0044707 single-multicellular organism process; GO:0043588 skin development; GO:0030216 keratinocyte differentiation; GO:0009888 tissue development; GO:0031424 keratinization; GO:0048731 system development; GO:0070268 cornification; GO:0048869 cellular developmental process; GO:0044763 single-organism cellular process; GO:0044…	GO:0016020 membrane; GO:0005615 extracellular space; GO:0044421 extracellular region part; GO:0005737 cytoplasm; GO:0031982 vesicle; GO:0099512 supramolecular fiber; GO:0044424 intracellular part; GO:0099080 supramolecular complex; GO:0005623 cell; GO:0044422 organelle part; GO:0043228 non-membrane-bounded organelle; GO:0005856 cytoskeleton; GO:0070062 extracellular exosome; GO:0005622 intracellu…	GO:0030280 structural constituent of epidermis; GO:0005198 structural molecule activity;	K07604	KRT1; type I keratin, acidic	hsa04915 Estrogen signaling pathway - Homo sapiens (human);
A0A0C4DH34	Immunoglobulin heavy variable 4-28 OS=Homo sapiens OX=9606 GN=IGHV4-28 PE=3 SV=1	2.04	Up	9.5752e-07	IGHV4-28	13.124	0.771	0.791	0.764	1.565	1.624	1.556	extracellular	GO:0044700 single organism signaling; GO:0002694 regulation of leukocyte activation; GO:0016064 immunoglobulin mediated immune response; GO:0007166 cell surface receptor signaling pathway; GO:0098542 defense response to other organism; GO:0044699 single-organism process; GO:0051249 regulation of lymphocyte activation; GO:0009607 response to biotic stimulus; GO:0051234 establishment of localizatio…	GO:0016020 membrane; GO:0044421 extracellular region part; GO:0005615 extracellular space; GO:0009897 external side of plasma membrane; GO:0071944 cell periphery; GO:0042571 immunoglobulin complex, circulating; GO:0019814 immunoglobulin complex; GO:0032991 macromolecular complex; GO:0005623 cell; GO:0005576 extracellular region; GO:0005886 plasma membrane; GO:0072562 blood microparticle; GO:00444…	GO:0034987 immunoglobulin receptor binding; GO:0005515 protein binding; GO:0005102 receptor binding; GO:0003823 antigen binding; GO:0005488 binding;	K06856	IGH; immunoglobulin heavy chain	hsa04020 Calcium signaling pathway - Homo sapiens (human); hsa04064 NF-kappa B signaling pathway - Homo sapiens (human); hsa04072 Phospholipase D signaling pathway - Homo sapiens (human); hsa04145 Phagosome - Homo sapiens (human); hsa04151 PI3K-Akt signaling pathway - Homo sapiens (human); hsa04640 Hematopoietic cell lineage - Homo sapiens (human); hsa04650 Natural killer cell mediated cytotoxici…	IPR007110; IPR013783; IPR013106;	Immunoglobulin-like domain; Immunoglobulin-like fold; Immunoglobulin V-set domain;
P98160	Basement membrane-specific heparan sulfate proteoglycan core protein OS=Homo sapiens OX=9606 GN=HSPG2 PE=1 SV=4	0.712	Down	0.0053807	HSPG2	468.83	1.084	1.273	1.279	0.849	0.829	0.912	extracellular	GO:0072359 circulatory system development; GO:0016043 cellular component organization; GO:0044707 single-multicellular organism process; GO:0001568 blood vessel development; GO:0006024 glycosaminoglycan biosynthetic process; GO:0006026 aminoglycan catabolic process; GO:0044267 cellular protein metabolic process; GO:0044699 single-organism process; GO:0044255 cellular lipid metabolic process; GO:0…	GO:0016020 membrane; GO:0005615 extracellular space; GO:0044421 extracellular region part; GO:0030054 cell junction; GO:0071944 cell periphery; GO:0031982 vesicle; GO:0005737 cytoplasm; GO:0044424 intracellular part; GO:0005623 cell; GO:0044420 extracellular matrix component; GO:0044422 organelle part; GO:0005604 basement membrane; GO:0005775 vacuolar lumen; GO:0070062 extracellular exosome; GO:0…	GO:0046872 metal ion binding; GO:0043169 cation binding; GO:0008022 protein C-terminus binding; GO:0005515 protein binding; GO:0005509 calcium ion binding; GO:0005488 binding; GO:0043167 ion binding;	K06255	HSPG2; heparan sulfate proteoglycan 2 (perlecan)	hsa04512 ECM-receptor interaction - Homo sapiens (human); hsa05161 Hepatitis B - Homo sapiens (human); hsa05205 Proteoglycans in cancer - Homo sapiens (human);	IPR003598; IPR007110; IPR000034; IPR000082; IPR001881; IPR003599; IPR000742; IPR001791; IPR013098; IPR013320; IPR013783; IPR013106; IPR002049;	Immunoglobulin subtype 2; Immunoglobulin-like domain; Laminin IV; SEA domain; EGF-like calcium-binding domain; Immunoglobulin subtype; EGF-like domain; Laminin G domain; Immunoglobulin I-set; Concanavalin A-like lectin/glucanase domain; Immunoglobulin-like fold; Immunoglobulin V-set domain; Laminin EGF domain;
P20851	C4b-binding protein beta chain OS=Homo sapiens OX=9606 GN=C4BPB PE=1 SV=1	1.307	Up	0.0048798	C4BPB	28.357	0.761	0.707	0.812	0.947	0.998	1.036	extracellular	GO:0060627 regulation of vesicle-mediated transport; GO:0030450 regulation of complement activation, classical pathway; GO:0016064 immunoglobulin mediated immune response; GO:0007596 blood coagulation; GO:0065008 regulation of biological quality; GO:0002698 negative regulation of immune effector process; GO:1903318 negative regulation of protein maturation; GO:0045916 negative regulation of compl…	GO:0016020 membrane; GO:0044217 other organism part; GO:0005615 extracellular space; GO:0044421 extracellular region part; GO:0044464 cell part; GO:0071944 cell periphery; GO:0044216 other organism cell; GO:0044215 other organism; GO:0005623 cell; GO:0005576 extracellular region; GO:0005886 plasma membrane;	GO:0005515 protein binding; GO:0005488 binding;	K04003	C4BPB; complement component 4 binding protein, beta	hsa04610 Complement and coagulation cascades - Homo sapiens (human); hsa05133 Pertussis - Homo sapiens (human);	IPR000436;	Sushi/SCR/CCP domain;
P61981	14-3-3 protein gamma OS=Homo sapiens OX=9606 GN=YWHAG PE=1 SV=2	0.327	Down	3.4277e-06	YWHAG	28.302	1.754	1.743	1.718	0.542	0.555	0.61	cytoplasm	GO:0044085 cellular component biogenesis; GO:0065008 regulation of biological quality; GO:0010941 regulation of cell death; GO:0060271 cilium assembly; GO:0010821 regulation of mitochondrion organization; GO:0015031 protein transport; GO:0044782 cilium organization; GO:0071900 regulation of protein serine/threonine kinase activity; GO:1901028 regulation of mitochondrial outer membrane permeabiliz…	GO:0016020 membrane; GO:0044421 extracellular region part; GO:0031090 organelle membrane; GO:0031410 cytoplasmic vesicle; GO:0030054 cell junction; GO:0005737 cytoplasm; GO:0031982 vesicle; GO:0044433 cytoplasmic vesicle part; GO:0044424 intracellular part; GO:0005623 cell; GO:0044422 organelle part; GO:0070062 extracellular exosome; GO:0005925 focal adhesion; GO:0043209 myelin sheath; GO:0005622…	GO:0030291 protein serine/threonine kinase inhibitor activity; GO:0003723 RNA binding; GO:1990782 protein tyrosine kinase binding; GO:0005102 receptor binding; GO:0019901 protein kinase binding; GO:0005515 protein binding; GO:0008426 protein kinase C inhibitor activity; GO:0004860 protein kinase inhibitor activity; GO:0019207 kinase regulator activity; GO:0019887 protein kinase regulator activity…	K16198	YWHAG_H; 14-3-3 protein gamma/eta	hsa04110 Cell cycle - Homo sapiens (human); hsa04114 Oocyte meiosis - Homo sapiens (human); hsa04151 PI3K-Akt signaling pathway - Homo sapiens (human); hsa04390 Hippo signaling pathway - Homo sapiens (human); hsa05203 Viral carcinogenesis - Homo sapiens (human);	IPR023410;	14-3-3 domain;
Q15431	Synaptonemal complex protein 1 OS=Homo sapiens OX=9606 GN=SYCP1 PE=1 SV=2	0.701	Down	0.00037541	SYCP1	114.19	0.942	0.968	1.043	0.692	0.7	0.678	nucleus	GO:0044085 cellular component biogenesis; GO:0022414 reproductive process; GO:0048869 cellular developmental process; GO:0044699 single-organism process; GO:0009058 biosynthetic process; GO:0007131 reciprocal meiotic recombination; GO:0051026 chiasma assembly; GO:0044237 cellular metabolic process; GO:0007129 synapsis; GO:0008152 metabolic process; GO:0022607 cellular component assembly; GO:00072…	GO:0044424 intracellular part; GO:0005623 cell; GO:0044422 organelle part; GO:0044427 chromosomal part; GO:0043228 non-membrane-bounded organelle; GO:0000793 condensed chromosome; GO:0031974 membrane-enclosed lumen; GO:0070013 intracellular organelle lumen; GO:0005622 intracellular; GO:0044464 cell part; GO:0044454 nuclear chromosome part; GO:0005694 chromosome; GO:0000801 central element; GO:000…	GO:0097159 organic cyclic compound binding; GO:1901363 heterocyclic compound binding; GO:0003677 DNA binding; GO:0005488 binding; GO:0003676 nucleic acid binding;	K19533	SYCP1; synaptonemal complex protein 1
Q9BXW9	Fanconi anemia group D2 protein OS=Homo sapiens OX=9606 GN=FANCD2 PE=1 SV=2	0.812	Down	0.0124645	FANCD2	164.13	1.426	1.39		1.166	1.121		nucleus	GO:0050863 regulation of T cell activation; GO:0002694 regulation of leukocyte activation; GO:0022414 reproductive process; GO:0007420 brain development; GO:0023051 regulation of signaling; GO:0044699 single-organism process; GO:0051249 regulation of lymphocyte activation; GO:0031347 regulation of defense response; GO:0044237 cellular metabolic process; GO:0007129 synapsis; GO:2001141 regulation …	GO:0043229 intracellular organelle; GO:0043232 intracellular non-membrane-bounded organelle; GO:0005737 cytoplasm; GO:0044446 intracellular organelle part; GO:0031981 nuclear lumen; GO:0044424 intracellular part; GO:0005730 nucleolus; GO:0005829 cytosol; GO:0016604 nuclear body; GO:0005623 cell; GO:0044422 organelle part; GO:0043228 non-membrane-bounded organelle; GO:0000793 condensed chromosome;…	GO:0005515 protein binding; GO:0070182 DNA polymerase binding; GO:0005488 binding; GO:0019899 enzyme binding;	K10891	FANCD2; fanconi anemia group D2 protein	hsa03460 Fanconi anemia pathway - Homo sapiens (human);
P04217	Alpha-1B-glycoprotein OS=Homo sapiens OX=9606 GN=A1BG PE=1 SV=4	1.254	Up	0.000198366	A1BG	54.253	1.073	1.028	1.046	1.346	1.294	1.305	extracellular	GO:0045321 leukocyte activation; GO:0002283 neutrophil activation involved in immune response; GO:0002252 immune effector process; GO:0044699 single-organism process; GO:0002576 platelet degranulation; GO:0050896 response to stimulus; GO:0051234 establishment of localization; GO:0002275 myeloid cell activation involved in immune response; GO:1902578 single-organism localization; GO:0036230 granul…	GO:0034774 secretory granule lumen; GO:0005615 extracellular space; GO:0044421 extracellular region part; GO:0031410 cytoplasmic vesicle; GO:0005737 cytoplasm; GO:0031982 vesicle; GO:0044433 cytoplasmic vesicle part; GO:0044424 intracellular part; GO:0005623 cell; GO:1904813 ficolin-1-rich granule lumen; GO:0044422 organelle part; GO:0101002 ficolin-1-rich granule; GO:0031974 membrane-enclosed lu…	GO:0005515 protein binding; GO:0005488 binding;				IPR003598; IPR007110; IPR013783; IPR003599;	Immunoglobulin subtype 2; Immunoglobulin-like domain; Immunoglobulin-like fold; Immunoglobulin subtype;
P13611	Versican core protein OS=Homo sapiens OX=9606 GN=VCAN PE=1 SV=3	0.813	Down	0.0105818	VCAN	372.82	0.794	0.847	0.899	0.724	0.684	0.657	mitochondria	GO:0001649 osteoblast differentiation; GO:0016053 organic acid biosynthetic process; GO:0051674 localization of cell; GO:0030206 chondroitin sulfate biosynthetic process; GO:0006024 glycosaminoglycan biosynthetic process; GO:0006026 aminoglycan catabolic process; GO:0048869 cellular developmental process; GO:0022008 neurogenesis; GO:0044699 single-organism process; GO:0009058 biosynthetic process…	GO:0016020 membrane; GO:0005615 extracellular space; GO:0044421 extracellular region part; GO:0005737 cytoplasm; GO:0044424 intracellular part; GO:0005623 cell; GO:0044422 organelle part; GO:0005775 vacuolar lumen; GO:0031974 membrane-enclosed lumen; GO:0070013 intracellular organelle lumen; GO:0005622 intracellular; GO:0044464 cell part; GO:0005764 lysosome; GO:0044431 Golgi apparatus part; GO:0…	GO:0005201 extracellular matrix structural constituent; GO:0097367 carbohydrate derivative binding; GO:0005488 binding; GO:0043167 ion binding; GO:0005540 hyaluronic acid binding; GO:0043169 cation binding; GO:0046872 metal ion binding; GO:0030246 carbohydrate binding; GO:0005515 protein binding; GO:0005509 calcium ion binding; GO:0005539 glycosaminoglycan binding; GO:0005198 structural molecule …	K06793	VCAN, CSPG2; versican core protein	hsa04514 Cell adhesion molecules (CAMs) - Homo sapiens (human);	IPR007110; IPR016187; IPR001881; IPR003599; IPR000742; IPR016186; IPR001304; IPR033987; IPR000436; IPR013783; IPR000538; IPR013106;	Immunoglobulin-like domain; C-type lectin fold; EGF-like calcium-binding domain; Immunoglobulin subtype; EGF-like domain; C-type lectin-like/link domain; C-type lectin-like; Aggrecan/versican, C-type lectin-like domain; Sushi/SCR/CCP domain; Immunoglobulin-like fold; Link domain; Immunoglobulin V-set domain;
Q14697	Neutral alpha-glucosidase AB OS=Homo sapiens OX=9606 GN=GANAB PE=1 SV=3	0.646	Down	0.0082595	GANAB	106.87	1.099	1.268	1.009	0.807	0.656	0.718	endoplasmic reticulum	GO:0006457 protein folding; GO:0008152 metabolic process; GO:0005975 carbohydrate metabolic process; GO:0044238 primary metabolic process; GO:0009987 cellular process; GO:0071704 organic substance metabolic process;	GO:0016020 membrane; GO:0044421 extracellular region part; GO:0005783 endoplasmic reticulum; GO:0031410 cytoplasmic vesicle; GO:0031982 vesicle; GO:0005737 cytoplasm; GO:0032991 macromolecular complex; GO:0044424 intracellular part; GO:0005623 cell; GO:0044422 organelle part; GO:0048770 pigment granule; GO:0070062 extracellular exosome; GO:0031974 membrane-enclosed lumen; GO:0070013 intracellular…	GO:0097159 organic cyclic compound binding; GO:1901363 heterocyclic compound binding; GO:0003723 RNA binding; GO:0090599 alpha-glucosidase activity; GO:0003824 catalytic activity; GO:0005488 binding; GO:0016798 hydrolase activity, acting on glycosyl bonds; GO:0003676 nucleic acid binding; GO:0015926 glucosidase activity; GO:0030246 carbohydrate binding; GO:0004553 hydrolase activity, hydrolyzing …	K05546	GANAB; alpha 1,3-glucosidase [EC:3.2.1.84]	hsa00510 N-Glycan biosynthesis - Homo sapiens (human); hsa01100 Metabolic pathways - Homo sapiens (human); hsa04141 Protein processing in endoplasmic reticulum - Homo sapiens (human);	IPR011013; IPR025887; IPR017853;	Galactose mutarotase-like domain; Glycoside hydrolase family 31, N-terminal domain; Glycoside hydrolase superfamily;
P0DOX7	Immunoglobulin kappa light chain OS=Homo sapiens OX=9606 PE=1 SV=1	1.365	Up	0.0086991	---	23.379	0.92	0.868	1.046	1.201	1.326	1.341	nucleus			GO:0005515 protein binding; GO:0005488 binding;				IPR007110; IPR013783; IPR013106; IPR003599; IPR003597;	Immunoglobulin-like domain; Immunoglobulin-like fold; Immunoglobulin V-set domain; Immunoglobulin subtype; Immunoglobulin C1-set;
P04004	Vitronectin OS=Homo sapiens OX=9606 GN=VTN PE=1 SV=1	0.816	Down	0.00023831	VTN	54.305	1.089	1.096	1.139	0.89	0.916	0.905	extracellular	GO:0060627 regulation of vesicle-mediated transport; GO:0044085 cellular component biogenesis; GO:0065008 regulation of biological quality; GO:0030335 positive regulation of cell migration; GO:0048732 gland development; GO:0032270 positive regulation of cellular protein metabolic process; GO:0031347 regulation of defense response; GO:0007492 endoderm development; GO:0022610 biological adhesion; G…	GO:0016020 membrane; GO:0005615 extracellular space; GO:0044421 extracellular region part; GO:0005783 endoplasmic reticulum; GO:0071944 cell periphery; GO:0098796 membrane protein complex; GO:0031982 vesicle; GO:0005737 cytoplasm; GO:0032991 macromolecular complex; GO:0044424 intracellular part; GO:0005623 cell; GO:0044420 extracellular matrix component; GO:0044422 organelle part; GO:0005604 base…	GO:0005102 receptor binding; GO:0043167 ion binding; GO:0044877 macromolecular complex binding; GO:0038024 cargo receptor activity; GO:0005044 scavenger receptor activity; GO:0005515 protein binding; GO:0005178 integrin binding; GO:0008201 heparin binding; GO:1901681 sulfur compound binding; GO:0050840 extracellular matrix binding; GO:0050839 cell adhesion molecule binding; GO:0060089 molecular t…	K06251	VTN; vitronectin	hsa04151 PI3K-Akt signaling pathway - Homo sapiens (human); hsa04510 Focal adhesion - Homo sapiens (human); hsa04512 ECM-receptor interaction - Homo sapiens (human); hsa04610 Complement and coagulation cascades - Homo sapiens (human); hsa05165 Human papillomavirus infection - Homo sapiens (human); hsa05205 Proteoglycans in cancer - Homo sapiens (human);	IPR000585; IPR020436; IPR001212;	Hemopexin-like domain; Somatomedin B, chordata; Somatomedin B domain;
Q76KP1	N-acetyl-beta-glucosaminyl-glycoprotein 4-beta-N-acetylgalactosaminyltransferase 1 OS=Homo sapiens OX=9606 GN=B4GALNT4 PE=1 SV=1	1.488	Up	0.024678	B4GALNT4	116.51	0.986		0.897	1.341		1.46	Golgi apparatus		GO:0043229 intracellular organelle; GO:0016020 membrane; GO:0032580 Golgi cisterna membrane; GO:0098588 bounding membrane of organelle; GO:0031090 organelle membrane; GO:0005737 cytoplasm; GO:0044446 intracellular organelle part; GO:0000139 Golgi membrane; GO:0031224 intrinsic component of membrane; GO:0012505 endomembrane system; GO:0005795 Golgi stack; GO:0044424 intracellular part; GO:0005623 …	GO:0016758 transferase activity, transferring hexosyl groups; GO:0033842 N-acetyl-beta-glucosaminyl-glycoprotein 4-beta-N-acetylgalactosaminyltransferase activity; GO:0003824 catalytic activity; GO:0008194 UDP-glycosyltransferase activity; GO:0016757 transferase activity, transferring glycosyl groups; GO:0008376 acetylgalactosaminyltransferase activity; GO:0016740 transferase activity;	K09657	B4GALNT4; beta-1,4-N-acetylgalactosaminyltransferase 4 [EC:2.4.1.244]	hsa01100 Metabolic pathways - Homo sapiens (human);	IPR011658; IPR029044;	PA14 domain; Nucleotide-diphospho-sugar transferases;
O94985	Calsyntenin-1 OS=Homo sapiens OX=9606 GN=CLSTN1 PE=1 SV=1	0.796	Down	0.049378	CLSTN1	109.79	0.798	0.746	0.897	0.688	0.685	0.57	plasma membrane	GO:0050794 regulation of cellular process; GO:0065008 regulation of biological quality; GO:0040008 regulation of growth; GO:0051965 positive regulation of synapse assembly; GO:0023051 regulation of signaling; GO:0044087 regulation of cellular component biogenesis; GO:0051239 regulation of multicellular organismal process; GO:0050807 regulation of synapse organization; GO:0001558 regulation of cel…	GO:0016020 membrane; GO:0042175 nuclear outer membrane-endoplasmic reticulum membrane network; GO:0005615 extracellular space; GO:0044421 extracellular region part; GO:0005783 endoplasmic reticulum; GO:0031090 organelle membrane; GO:0071944 cell periphery; GO:0030054 cell junction; GO:0031982 vesicle; GO:0005737 cytoplasm; GO:0031224 intrinsic component of membrane; GO:0044424 intracellular part;…	GO:0001540 beta-amyloid binding; GO:0008092 cytoskeletal protein binding; GO:0019894 kinesin binding; GO:0042277 peptide binding; GO:0005488 binding; GO:0043167 ion binding; GO:0043169 cation binding; GO:0046872 metal ion binding; GO:0005515 protein binding; GO:0005509 calcium ion binding; GO:0033218 amide binding; GO:0042988 X11-like protein binding;	K22659			IPR015919; IPR013320; IPR002126;	Cadherin-like; Concanavalin A-like lectin/glucanase domain; Cadherin;
Q16610	Extracellular matrix protein 1 OS=Homo sapiens OX=9606 GN=ECM1 PE=1 SV=2	1.275	Up	0.02966	ECM1	60.673	1.003	1.067	1.131	1.508	1.362	1.21	extracellular	GO:0044700 single organism signaling; GO:0030500 regulation of bone mineralization; GO:0070167 regulation of biomineral tissue development; GO:0010466 negative regulation of peptidase activity; GO:0001525 angiogenesis; GO:0051240 positive regulation of multicellular organismal process; GO:0032879 regulation of localization; GO:0050678 regulation of epithelial cell proliferation; GO:0043122 regula…	GO:0034774 secretory granule lumen; GO:0042827 platelet dense granule; GO:0005615 extracellular space; GO:0044421 extracellular region part; GO:0031410 cytoplasmic vesicle; GO:0005737 cytoplasm; GO:0031982 vesicle; GO:0044433 cytoplasmic vesicle part; GO:0044424 intracellular part; GO:0005623 cell; GO:0044422 organelle part; GO:0031974 membrane-enclosed lumen; GO:0070062 extracellular exosome; GO…	GO:0002020 protease binding; GO:0043236 laminin binding; GO:0005102 receptor binding; GO:0005488 binding; GO:0005126 cytokine receptor binding; GO:0070851 growth factor receptor binding; GO:0008022 protein C-terminus binding; GO:0005515 protein binding; GO:0005134 interleukin-2 receptor binding; GO:0004871 signal transducer activity; GO:0050840 extracellular matrix binding; GO:0019899 enzyme bind…				IPR020858;	Serum albumin-like;
P06312	Immunoglobulin kappa variable 4-1 OS=Homo sapiens OX=9606 GN=IGKV4-1 PE=1 SV=1	1.966	Up	0.0002384	IGKV4-1	13.38	0.694	0.794	0.781	1.577	1.403	1.481	extracellular	GO:0044700 single organism signaling; GO:0016064 immunoglobulin mediated immune response; GO:0051674 localization of cell; GO:0007166 cell surface receptor signaling pathway; GO:0038094 Fc-gamma receptor signaling pathway; GO:0044699 single-organism process; GO:0006909 phagocytosis; GO:0051234 establishment of localization; GO:0006956 complement activation; GO:0007165 signal transduction; GO:0008…	GO:0016020 membrane; GO:0072562 blood microparticle; GO:0044421 extracellular region part; GO:0005615 extracellular space; GO:0044464 cell part; GO:0071944 cell periphery; GO:0005623 cell; GO:0005576 extracellular region; GO:0005886 plasma membrane;	GO:0004252 serine-type endopeptidase activity; GO:0004175 endopeptidase activity; GO:0008233 peptidase activity; GO:0003824 catalytic activity; GO:0017171 serine hydrolase activity; GO:0005488 binding; GO:0008236 serine-type peptidase activity; GO:0070011 peptidase activity, acting on L-amino acid peptides; GO:0016787 hydrolase activity; GO:0005515 protein binding; GO:0003823 antigen binding;				IPR007110; IPR013783; IPR003599; IPR013106;	Immunoglobulin-like domain; Immunoglobulin-like fold; Immunoglobulin subtype; Immunoglobulin V-set domain;
Q9UQ35	Serine/arginine repetitive matrix protein 2 OS=Homo sapiens OX=9606 GN=SRRM2 PE=1 SV=2	0.425	Down	0.0071014	SRRM2	299.61		1.266	1.127		0.486	0.53	nucleus	GO:0006396 RNA processing; GO:0006725 cellular aromatic compound metabolic process; GO:1901360 organic cyclic compound metabolic process; GO:0006807 nitrogen compound metabolic process; GO:0044238 primary metabolic process; GO:0044237 cellular metabolic process; GO:0071704 organic substance metabolic process; GO:0006397 mRNA processing; GO:0016070 RNA metabolic process; GO:0000398 mRNA splicing, …	GO:0043229 intracellular organelle; GO:0044446 intracellular organelle part; GO:0032991 macromolecular complex; GO:0031981 nuclear lumen; GO:0044424 intracellular part; GO:0005681 spliceosomal complex; GO:0016604 nuclear body; GO:0005623 cell; GO:0015030 Cajal body; GO:0044422 organelle part; GO:0043226 organelle; GO:0043231 intracellular membrane-bounded organelle; GO:0031974 membrane-enclosed l…	GO:0097159 organic cyclic compound binding; GO:1901363 heterocyclic compound binding; GO:0003723 RNA binding; GO:0047485 protein N-terminus binding; GO:0005488 binding; GO:0003676 nucleic acid binding; GO:0070742 C2H2 zinc finger domain binding; GO:0005515 protein binding; GO:0019904 protein domain specific binding;	K13172	SRRM2, SRM300; serine/arginine repetitive matrix protein 2		IPR024945; IPR013170;	Spt5 C-terminal domain; mRNA splicing factor Cwf21 domain;
P02743	Serum amyloid P-component OS=Homo sapiens OX=9606 GN=APCS PE=1 SV=2	1.267	Up	0.00147628	APCS	25.387	0.82	0.775	0.757	0.956	1.011	1.014	extracellular	GO:0044085 cellular component biogenesis; GO:0051093 negative regulation of developmental process; GO:0065008 regulation of biological quality; GO:0002762 negative regulation of myeloid leukocyte differentiation; GO:0045637 regulation of myeloid cell differentiation; GO:0044359 modulation of molecular function in other organism; GO:1903016 negative regulation of exo-alpha-sialidase activity; GO:0…	GO:0043229 intracellular organelle; GO:0005615 extracellular space; GO:0044421 extracellular region part; GO:0031982 vesicle; GO:0044424 intracellular part; GO:0005623 cell; GO:0005576 extracellular region; GO:0043226 organelle; GO:0070062 extracellular exosome; GO:0043231 intracellular membrane-bounded organelle; GO:0072562 blood microparticle; GO:0005634 nucleus; GO:0005622 intracellular; GO:00…	GO:0001849 complement component C1q binding; GO:0001846 opsonin binding; GO:0005488 binding; GO:0043167 ion binding; GO:0001848 complement binding; GO:0030246 carbohydrate binding; GO:0043169 cation binding; GO:0046872 metal ion binding; GO:0005515 protein binding; GO:0005509 calcium ion binding; GO:0051082 unfolded protein binding; GO:0046790 virion binding;				IPR013320;	Concanavalin A-like lectin/glucanase domain;
P0DP25	Calmodulin-3 OS=Homo sapiens OX=9606 GN=CALM3 PE=1 SV=1	0.197	Down	0.00049654	CALM3	16.837	1.77	2.195	2.097	0.44	0.462	0.293	cytoplasm,nucleus			GO:0043169 cation binding; GO:0046872 metal ion binding; GO:0005509 calcium ion binding; GO:0005488 binding; GO:0043167 ion binding;	K02183	CALM; calmodulin	hsa04014 Ras signaling pathway - Homo sapiens (human); hsa04015 Rap1 signaling pathway - Homo sapiens (human); hsa04020 Calcium signaling pathway - Homo sapiens (human); hsa04022 cGMP-PKG signaling pathway - Homo sapiens (human); hsa04024 cAMP signaling pathway - Homo sapiens (human); hsa04070 Phosphatidylinositol signaling system - Homo sapiens (human); hsa04114 Oocyte meiosis - Homo sapiens (hu…	IPR002048; IPR011992;	EF-hand domain; EF-hand domain pair;
P01700	Immunoglobulin lambda variable 1-47 OS=Homo sapiens OX=9606 GN=IGLV1-47 PE=1 SV=2	1.24	Up	0.0074777	IGLV1-47	12.283	0.97	1.005	0.908	1.232	1.119	1.224	extracellular	GO:0044700 single organism signaling; GO:0016064 immunoglobulin mediated immune response; GO:0051674 localization of cell; GO:0007166 cell surface receptor signaling pathway; GO:0038094 Fc-gamma receptor signaling pathway; GO:0044699 single-organism process; GO:0006909 phagocytosis; GO:0051234 establishment of localization; GO:0006956 complement activation; GO:0007165 signal transduction; GO:0008…	GO:0016020 membrane; GO:0005615 extracellular space; GO:0044421 extracellular region part; GO:0071944 cell periphery; GO:0031982 vesicle; GO:0005623 cell; GO:0005576 extracellular region; GO:0005886 plasma membrane; GO:0043226 organelle; GO:0070062 extracellular exosome; GO:0072562 blood microparticle; GO:0044464 cell part; GO:1903561 extracellular vesicle; GO:0043227 membrane-bounded organelle; …	GO:0004252 serine-type endopeptidase activity; GO:0004175 endopeptidase activity; GO:0008233 peptidase activity; GO:0003824 catalytic activity; GO:0017171 serine hydrolase activity; GO:0005488 binding; GO:0008236 serine-type peptidase activity; GO:0070011 peptidase activity, acting on L-amino acid peptides; GO:0016787 hydrolase activity; GO:0005515 protein binding; GO:0003823 antigen binding;				IPR007110; IPR013783; IPR003599; IPR013106;	Immunoglobulin-like domain; Immunoglobulin-like fold; Immunoglobulin subtype; Immunoglobulin V-set domain;
P98095	Fibulin-2 OS=Homo sapiens OX=9606 GN=FBLN2 PE=1 SV=2	0.492	Down	0.00116157	FBLN2	126.57	1.218	1.257	1.421	0.651	0.555	0.71	extracellular	GO:0050789 regulation of biological process; GO:0010810 regulation of cell-substrate adhesion; GO:0045785 positive regulation of cell adhesion; GO:0048518 positive regulation of biological process; GO:0010811 positive regulation of cell-substrate adhesion; GO:0030155 regulation of cell adhesion; GO:0065007 biological regulation;	GO:0031012 extracellular matrix; GO:0070062 extracellular exosome; GO:0043226 organelle; GO:0005615 extracellular space; GO:0044421 extracellular region part; GO:0031982 vesicle; GO:1903561 extracellular vesicle; GO:0005578 proteinaceous extracellular matrix; GO:0043227 membrane-bounded organelle; GO:0005576 extracellular region; GO:0043230 extracellular organelle;	GO:0005201 extracellular matrix structural constituent; GO:0005488 binding; GO:0043167 ion binding; GO:0046872 metal ion binding; GO:0043169 cation binding; GO:0005515 protein binding; GO:0005509 calcium ion binding; GO:0005198 structural molecule activity; GO:0050840 extracellular matrix binding;	K17307	FBLN1_2; fibulin 1/2		IPR026823; IPR001881; IPR000742; IPR009030; IPR000020;	Complement Clr-like EGF domain; EGF-like calcium-binding domain; EGF-like domain; Growth factor receptor cysteine-rich domain; Anaphylatoxin/fibulin;
P02654	Apolipoprotein C-I OS=Homo sapiens OX=9606 GN=APOC1 PE=1 SV=1	0.65	Down	0.0041209	APOC1	9.3318	1.384	1.327	1.361	0.989	0.769	0.888	extracellular	GO:0060627 regulation of vesicle-mediated transport; GO:0044085 cellular component biogenesis; GO:0032371 regulation of sterol transport; GO:0006066 alcohol metabolic process; GO:0034379 very-low-density lipoprotein particle assembly; GO:0044255 cellular lipid metabolic process; GO:0019216 regulation of lipid metabolic process; GO:0044237 cellular metabolic process; GO:0042157 lipoprotein metabol…	GO:0043229 intracellular organelle; GO:0044421 extracellular region part; GO:0005615 extracellular space; GO:0005783 endoplasmic reticulum; GO:0031982 vesicle; GO:0034358 plasma lipoprotein particle; GO:0005737 cytoplasm; GO:0034385 triglyceride-rich plasma lipoprotein particle; GO:0032991 macromolecular complex; GO:0012505 endomembrane system; GO:0044424 intracellular part; GO:0042627 chylomicro…	GO:0070405 ammonium ion binding; GO:0055102 lipase inhibitor activity; GO:0043167 ion binding; GO:0043177 organic acid binding; GO:0004859 phospholipase inhibitor activity; GO:0033293 monocarboxylic acid binding; GO:0004857 enzyme inhibitor activity; GO:0098772 molecular function regulator; GO:0031210 phosphatidylcholine binding; GO:0050997 quaternary ammonium group binding; GO:0031406 carboxylic…	K22286	APOC1; apolipoprotein C-I	hsa04979 Cholesterol metabolism - Homo sapiens (human);
Q9H4G4	Golgi-associated plant pathogenesis-related protein 1 OS=Homo sapiens OX=9606 GN=GLIPR2 PE=1 SV=3	0.49	Down	0.030263	GLIPR2	17.218		1.194	1.261		0.527	0.677	cytoplasm	GO:0050794 regulation of cellular process; GO:0030335 positive regulation of cell migration; GO:0032270 positive regulation of cellular protein metabolic process; GO:0010717 regulation of epithelial to mesenchymal transition; GO:0060255 regulation of macromolecule metabolic process; GO:0040017 positive regulation of locomotion; GO:0031399 regulation of protein modification process; GO:0023051 reg…	GO:0043229 intracellular organelle; GO:0016020 membrane; GO:0044421 extracellular region part; GO:0098588 bounding membrane of organelle; GO:0031090 organelle membrane; GO:0005737 cytoplasm; GO:0044446 intracellular organelle part; GO:0031982 vesicle; GO:0000139 Golgi membrane; GO:0012505 endomembrane system; GO:0044424 intracellular part; GO:0005623 cell; GO:0005576 extracellular region; GO:0044…	GO:0005515 protein binding; GO:0042802 identical protein binding; GO:0042803 protein homodimerization activity; GO:0005488 binding; GO:0046983 protein dimerization activity;				IPR034113; IPR014044;	Golgi-associated plant pathogenesis-related protein 1, SCP domain; CAP domain;
O43866	CD5 antigen-like OS=Homo sapiens OX=9606 GN=CD5L PE=1 SV=1	0.644	Down	0.00028099	CD5L	38.087	1.166	1.209	1.073	0.725	0.749	0.746	extracellular	GO:0006950 response to stress; GO:0016192 vesicle-mediated transport; GO:0044763 single-organism cellular process; GO:0044699 single-organism process; GO:0002376 immune system process; GO:0006897 endocytosis; GO:0050896 response to stimulus; GO:0051234 establishment of localization; GO:0006810 transport; GO:0008219 cell death; GO:0006968 cellular defense response; GO:0006954 inflammatory response…	GO:0016020 membrane; GO:0005615 extracellular space; GO:0044421 extracellular region part; GO:0005737 cytoplasm; GO:0031982 vesicle; GO:0044424 intracellular part; GO:0005623 cell; GO:0005576 extracellular region; GO:0043226 organelle; GO:0070062 extracellular exosome; GO:0072562 blood microparticle; GO:0005622 intracellular; GO:0044464 cell part; GO:1903561 extracellular vesicle; GO:0043227 memb…	GO:0038024 cargo receptor activity; GO:0005044 scavenger receptor activity; GO:0060089 molecular transducer activity; GO:0004872 receptor activity;				IPR017448; IPR001190;	SRCR-like domain; SRCR domain;
P02655	Apolipoprotein C-II OS=Homo sapiens OX=9606 GN=APOC2 PE=1 SV=1	0.698	Down	7.5555e-05	APOC2	11.284	1.639	1.588	1.602	1.088	1.121	1.162	extracellular	GO:0060627 regulation of vesicle-mediated transport; GO:0065008 regulation of biological quality; GO:0032371 regulation of sterol transport; GO:0009891 positive regulation of biosynthetic process; GO:0044255 cellular lipid metabolic process; GO:0070328 triglyceride homeostasis; GO:0019216 regulation of lipid metabolic process; GO:0044237 cellular metabolic process; GO:0015031 protein transport; G…	GO:0005615 extracellular space; GO:0044421 extracellular region part; GO:0031410 cytoplasmic vesicle; GO:0034362 low-density lipoprotein particle; GO:0005737 cytoplasm; GO:0031982 vesicle; GO:0034358 plasma lipoprotein particle; GO:0034385 triglyceride-rich plasma lipoprotein particle; GO:0032991 macromolecular complex; GO:0044424 intracellular part; GO:0005623 cell; GO:0034361 very-low-density l…	GO:0055102 lipase inhibitor activity; GO:0043274 phospholipase binding; GO:0046983 protein dimerization activity; GO:0005515 protein binding; GO:0004857 enzyme inhibitor activity; GO:0016004 phospholipase activator activity; GO:0098772 molecular function regulator; GO:0042802 identical protein binding; GO:0030234 enzyme regulator activity; GO:0005488 binding; GO:0042803 protein homodimerization a…	K22287	APOC2; apolipoprotein C-II	hsa04979 Cholesterol metabolism - Homo sapiens (human);	IPR023121;	ApoC-II domain;
P25311	Zinc-alpha-2-glycoprotein OS=Homo sapiens OX=9606 GN=AZGP1 PE=1 SV=2	0.702	Down	0.0184752	AZGP1	34.258	0.733	0.805	0.858	0.605	0.473	0.603	extracellular	GO:0050794 regulation of cellular process; GO:0009593 detection of chemical stimulus; GO:0044707 single-multicellular organism process; GO:0065008 regulation of biological quality; GO:0042127 regulation of cell proliferation; GO:0006725 cellular aromatic compound metabolic process; GO:0044699 single-organism process; GO:0048523 negative regulation of cellular process; GO:0048519 negative regulati…	GO:0016020 membrane; GO:0043229 intracellular organelle; GO:0005615 extracellular space; GO:0044421 extracellular region part; GO:0071944 cell periphery; GO:0031982 vesicle; GO:0044424 intracellular part; GO:0005623 cell; GO:0005576 extracellular region; GO:0005886 plasma membrane; GO:0043226 organelle; GO:0070062 extracellular exosome; GO:0043231 intracellular membrane-bounded organelle; GO:0005…	GO:0008565 protein transporter activity; GO:0022884 macromolecule transmembrane transporter activity; GO:0022892 substrate-specific transporter activity; GO:0008320 protein transmembrane transporter activity; GO:0016787 hydrolase activity; GO:0005515 protein binding; GO:0003823 antigen binding; GO:0022891 substrate-specific transmembrane transporter activity; GO:0097367 carbohydrate derivative bi…				IPR007110; IPR013783; IPR011161; IPR011162; IPR001039; IPR003597;	Immunoglobulin-like domain; Immunoglobulin-like fold; MHC class I-like antigen recognition-like; MHC classes I/II-like antigen recognition protein; MHC class I alpha chain, alpha1 alpha2 domains; Immunoglobulin C1-set;
P14317	Hematopoietic lineage cell-specific protein OS=Homo sapiens OX=9606 GN=HCLS1 PE=1 SV=3	0.053	Down	0.000183003	HCLS1	54.013	4.211	3.992	3.355	0.197	0.279	0.133	cytoplasm	GO:0044700 single organism signaling; GO:0044085 cellular component biogenesis; GO:0010941 regulation of cell death; GO:0065008 regulation of biological quality; GO:0032270 positive regulation of cellular protein metabolic process; GO:0051896 regulation of protein kinase B signaling; GO:0002262 myeloid cell homeostasis; GO:1903533 regulation of protein targeting; GO:0009891 positive regulation of…	GO:0043229 intracellular organelle; GO:0016020 membrane; GO:0071944 cell periphery; GO:0005737 cytoplasm; GO:0032991 macromolecular complex; GO:0044424 intracellular part; GO:0005667 transcription factor complex; GO:0005623 cell; GO:0005829 cytosol; GO:0005739 mitochondrion; GO:0005886 plasma membrane; GO:0043231 intracellular membrane-bounded organelle; GO:0043226 organelle; GO:0005634 nucleus; …	GO:0008092 cytoskeletal protein binding; GO:0001085 RNA polymerase II transcription factor binding; GO:0005488 binding; GO:0044877 macromolecular complex binding; GO:0019901 protein kinase binding; GO:0003779 actin binding; GO:0019904 protein domain specific binding; GO:0005515 protein binding; GO:0019900 kinase binding; GO:0017124 SH3 domain binding; GO:0019899 enzyme binding; GO:0008134 transcr…	K06106	CTTN, EMS1; cortactin	hsa04530 Tight junction - Homo sapiens (human); hsa05100 Bacterial invasion of epithelial cells - Homo sapiens (human); hsa05130 Pathogenic Escherichia coli infection - Homo sapiens (human); hsa05131 Shigellosis - Homo sapiens (human); hsa05205 Proteoglycans in cancer - Homo sapiens (human);	IPR001452;	SH3 domain;
P23083	Immunoglobulin heavy variable 1-2 OS=Homo sapiens OX=9606 GN=IGHV1-2 PE=1 SV=2	0.48	Down	0.036875	IGHV1-2	13.085	0.543	0.715		0.29	0.314		extracellular	GO:0044700 single organism signaling; GO:0016064 immunoglobulin mediated immune response; GO:0051674 localization of cell; GO:0007166 cell surface receptor signaling pathway; GO:0038094 Fc-gamma receptor signaling pathway; GO:0044699 single-organism process; GO:0006909 phagocytosis; GO:0051234 establishment of localization; GO:0006956 complement activation; GO:0007165 signal transduction; GO:0008…	GO:0016020 membrane; GO:0005623 cell; GO:0044464 cell part; GO:0071944 cell periphery; GO:0005576 extracellular region; GO:0005886 plasma membrane;	GO:0004252 serine-type endopeptidase activity; GO:0004175 endopeptidase activity; GO:0008233 peptidase activity; GO:0003824 catalytic activity; GO:0017171 serine hydrolase activity; GO:0005488 binding; GO:0008236 serine-type peptidase activity; GO:0070011 peptidase activity, acting on L-amino acid peptides; GO:0016787 hydrolase activity; GO:0005515 protein binding; GO:0003823 antigen binding;				IPR007110; IPR013783; IPR013106;	Immunoglobulin-like domain; Immunoglobulin-like fold; Immunoglobulin V-set domain;
P22891	Vitamin K-dependent protein Z OS=Homo sapiens OX=9606 GN=PROZ PE=1 SV=2	0.644	Down	0.0109033	PROZ	44.743	0.686	0.683	0.685	0.401	0.455	0.466	extracellular	GO:0007596 blood coagulation; GO:0065008 regulation of biological quality; GO:0006518 peptide metabolic process; GO:0006465 signal peptide processing; GO:0044699 single-organism process; GO:0051241 negative regulation of multicellular organismal process; GO:0016485 protein processing; GO:0044237 cellular metabolic process; GO:0051234 establishment of localization; GO:0009611 response to wounding;…	GO:0005788 endoplasmic reticulum lumen; GO:0043229 intracellular organelle; GO:0005615 extracellular space; GO:0005783 endoplasmic reticulum; GO:0044421 extracellular region part; GO:0005737 cytoplasm; GO:0044446 intracellular organelle part; GO:0031982 vesicle; GO:0005796 Golgi lumen; GO:0012505 endomembrane system; GO:0044424 intracellular part; GO:0005623 cell; GO:0005576 extracellular region;…	GO:0004252 serine-type endopeptidase activity; GO:0004175 endopeptidase activity; GO:0008233 peptidase activity; GO:0003824 catalytic activity; GO:0017171 serine hydrolase activity; GO:0005488 binding; GO:0043167 ion binding; GO:0008236 serine-type peptidase activity; GO:0043169 cation binding; GO:0046872 metal ion binding; GO:0070011 peptidase activity, acting on L-amino acid peptides; GO:000551…				IPR009003; IPR017857; IPR000294; IPR001254; IPR001881; IPR000742;	Peptidase S1, PA clan; Coagulation factor, subgroup, Gla domain; Gamma-carboxyglutamic acid-rich (GLA) domain; Serine proteases, trypsin domain; EGF-like calcium-binding domain; EGF-like domain;
P13667	Protein disulfide-isomerase A4 OS=Homo sapiens OX=9606 GN=PDIA4 PE=1 SV=2	0.583	Down	3.5605e-05	PDIA4	72.932	1.03	1.072	1.049	0.641	0.599	0.597	extracellular	GO:0050794 regulation of cellular process; GO:0033554 cellular response to stress; GO:0051716 cellular response to stimulus; GO:0065008 regulation of biological quality; GO:0034976 response to endoplasmic reticulum stress; GO:0006950 response to stress; GO:0045454 cell redox homeostasis; GO:0061077 chaperone-mediated protein folding; GO:0044763 single-organism cellular process; GO:0044699 single-…	GO:0097708 intracellular vesicle; GO:0005788 endoplasmic reticulum lumen; GO:0043229 intracellular organelle; GO:0005783 endoplasmic reticulum; GO:0031410 cytoplasmic vesicle; GO:0042470 melanosome; GO:0031982 vesicle; GO:0005737 cytoplasm; GO:0044446 intracellular organelle part; GO:0012505 endomembrane system; GO:0044424 intracellular part; GO:0005623 cell; GO:0044422 organelle part; GO:0048770…	GO:0097159 organic cyclic compound binding; GO:1901363 heterocyclic compound binding; GO:0016864 intramolecular oxidoreductase activity, transposing S-S bonds; GO:0003723 RNA binding; GO:0016853 isomerase activity; GO:0003824 catalytic activity; GO:0005488 binding; GO:0003676 nucleic acid binding; GO:0005515 protein binding; GO:0016860 intramolecular oxidoreductase activity; GO:0003756 protein di…	K09582	PDIA4, ERP72; protein disulfide-isomerase A4 [EC:5.3.4.1]	hsa04141 Protein processing in endoplasmic reticulum - Homo sapiens (human); hsa04918 Thyroid hormone synthesis - Homo sapiens (human); hsa05110 Vibrio cholerae infection - Homo sapiens (human);	IPR005788; IPR012336; IPR013766;	Disulphide isomerase; Thioredoxin-like fold; Thioredoxin domain;
O60279	Sushi domain-containing protein 5 OS=Homo sapiens OX=9606 GN=SUSD5 PE=1 SV=3	0.673	Down	0.0039603	SUSD5	68.02	1.166	1.137	1.002	0.78	0.674	0.771	plasma membrane	GO:0050794 regulation of cellular process; GO:0044700 single organism signaling; GO:0051716 cellular response to stimulus; GO:0022610 biological adhesion; GO:0007165 signal transduction; GO:0050789 regulation of biological process; GO:0007154 cell communication; GO:0007166 cell surface receptor signaling pathway; GO:0007155 cell adhesion; GO:0044699 single-organism process; GO:0023052 signaling; …	GO:0031224 intrinsic component of membrane; GO:0016020 membrane; GO:0016021 integral component of membrane; GO:0044425 membrane part;	GO:0097367 carbohydrate derivative binding; GO:0005539 glycosaminoglycan binding; GO:0005488 binding; GO:0005540 hyaluronic acid binding;				IPR000436; IPR016187; IPR000538; IPR016186;	Sushi/SCR/CCP domain; C-type lectin fold; Link domain; C-type lectin-like/link domain;
P26022	Pentraxin-related protein PTX3 OS=Homo sapiens OX=9606 GN=PTX3 PE=1 SV=3	0.165	Down	4.3316e-06	PTX3	41.975	2.445	2.448	2.299	0.351	0.421	0.417	extracellular	GO:0060627 regulation of vesicle-mediated transport; GO:0065008 regulation of biological quality; GO:0045321 leukocyte activation; GO:0045428 regulation of nitric oxide biosynthetic process; GO:0009891 positive regulation of biosynthetic process; GO:0044359 modulation of molecular function in other organism; GO:1903016 negative regulation of exo-alpha-sialidase activity; GO:0001878 response to ye…	GO:0034774 secretory granule lumen; GO:1904724 tertiary granule lumen; GO:0005615 extracellular space; GO:0044421 extracellular region part; GO:0031410 cytoplasmic vesicle; GO:0005737 cytoplasm; GO:0031982 vesicle; GO:0044433 cytoplasmic vesicle part; GO:0044424 intracellular part; GO:0005623 cell; GO:0044422 organelle part; GO:0031974 membrane-enclosed lumen; GO:0031983 vesicle lumen; GO:0070013…	GO:0001872 (1->3)-beta-D-glucan binding; GO:0042802 identical protein binding; GO:0030247 polysaccharide binding; GO:0001849 complement component C1q binding; GO:0001846 opsonin binding; GO:0005488 binding; GO:0001848 complement binding; GO:0030246 carbohydrate binding; GO:0005515 protein binding; GO:0001871 pattern binding; GO:0046790 virion binding;				IPR013320; IPR006558;	Concanavalin A-like lectin/glucanase domain; LamG-like jellyroll fold;
A0A0B4J1X8	Immunoglobulin heavy variable 3-43 OS=Homo sapiens OX=9606 GN=IGHV3-43 PE=3 SV=1	2.273	Up	0.000175835	IGHV3-43	13.077	0.787	0.759	0.801	1.945	1.592	1.797	extracellular	GO:0044700 single organism signaling; GO:0002694 regulation of leukocyte activation; GO:0016064 immunoglobulin mediated immune response; GO:0007166 cell surface receptor signaling pathway; GO:0098542 defense response to other organism; GO:0044699 single-organism process; GO:0051249 regulation of lymphocyte activation; GO:0009607 response to biotic stimulus; GO:0051234 establishment of localizatio…	GO:0016020 membrane; GO:0044421 extracellular region part; GO:0005615 extracellular space; GO:0009897 external side of plasma membrane; GO:0071944 cell periphery; GO:0042571 immunoglobulin complex, circulating; GO:0019814 immunoglobulin complex; GO:0032991 macromolecular complex; GO:0005623 cell; GO:0005576 extracellular region; GO:0005886 plasma membrane; GO:0072562 blood microparticle; GO:00444…	GO:0034987 immunoglobulin receptor binding; GO:0005515 protein binding; GO:0005102 receptor binding; GO:0003823 antigen binding; GO:0005488 binding;				IPR007110; IPR013783; IPR013106;	Immunoglobulin-like domain; Immunoglobulin-like fold; Immunoglobulin V-set domain;
P02768	Serum albumin OS=Homo sapiens OX=9606 GN=ALB PE=1 SV=2	0.805	Down	2.0173e-05	ALB	69.366	1.405	1.383	1.371	1.125	1.103	1.12	extracellular	GO:0065008 regulation of biological quality; GO:0015850 organic hydroxy compound transport; GO:0010941 regulation of cell death; GO:0001907 killing by symbiont of host cells; GO:0044699 single-organism process; GO:0044764 multi-organism cellular process; GO:0035821 modification of morphology or physiology of other organism; GO:0048871 multicellular organismal homeostasis; GO:0044004 disruption by…	GO:0034774 secretory granule lumen; GO:0005615 extracellular space; GO:0044421 extracellular region part; GO:0005783 endoplasmic reticulum; GO:0031410 cytoplasmic vesicle; GO:0031982 vesicle; GO:0005737 cytoplasm; GO:0044433 cytoplasmic vesicle part; GO:0032991 macromolecular complex; GO:0044424 intracellular part; GO:0005623 cell; GO:0044422 organelle part; GO:0031974 membrane-enclosed lumen; GO…	GO:0003677 DNA binding; GO:0015643 toxic substance binding; GO:0051087 chaperone binding; GO:0043167 ion binding; GO:0016209 antioxidant activity; GO:0043177 organic acid binding; GO:0005515 protein binding; GO:0008144 drug binding; GO:0005507 copper ion binding; GO:0033293 monocarboxylic acid binding; GO:0048037 cofactor binding; GO:0030170 pyridoxal phosphate binding; GO:1901363 heterocyclic co…	K16141	ALB; serum albumin	hsa04918 Thyroid hormone synthesis - Homo sapiens (human);	IPR014760; IPR020858;	Serum albumin, N-terminal; Serum albumin-like;
P08519	Apolipoprotein(a) OS=Homo sapiens OX=9606 GN=LPA PE=1 SV=1	0.415	Down	0.0029574	LPA	501.31	1.115	1.25	1.192	0.535	0.37	0.57	extracellular	GO:0050794 regulation of cellular process; GO:0010951 negative regulation of endopeptidase activity; GO:0060255 regulation of macromolecule metabolic process; GO:0044699 single-organism process; GO:0031324 negative regulation of cellular metabolic process; GO:0048519 negative regulation of biological process; GO:0048523 negative regulation of cellular process; GO:0042157 lipoprotein metabolic pro…	GO:0032991 macromolecular complex; GO:0044421 extracellular region part; GO:0005615 extracellular space; GO:0032994 protein-lipid complex; GO:0005576 extracellular region; GO:1990777 lipoprotein particle; GO:0034358 plasma lipoprotein particle;	GO:0008233 peptidase activity; GO:0001968 fibronectin binding; GO:0034185 apolipoprotein binding; GO:0061134 peptidase regulator activity; GO:0043167 ion binding; GO:0008236 serine-type peptidase activity; GO:0005515 protein binding; GO:0016787 hydrolase activity; GO:0098772 molecular function regulator; GO:0004857 enzyme inhibitor activity; GO:0008201 heparin binding; GO:0004866 endopeptidase in…	K09644	LPA; apolipoprotein(a) [EC:3.4.21.-]	hsa04979 Cholesterol metabolism - Homo sapiens (human);	IPR009003; IPR000001; IPR001254; IPR013806;	Peptidase S1, PA clan; Kringle; Serine proteases, trypsin domain; Kringle-like fold;
Q8N912	Nutritionally-regulated adipose and cardiac enriched protein homolog OS=Homo sapiens OX=9606 GN=NRAC PE=2 SV=1	0.115	Down	0.00022241	NRAC	18.051		3.542	3.436		0.39	0.413	plasma membrane		GO:0016020 membrane; GO:0044464 cell part; GO:0071944 cell periphery; GO:0044425 membrane part; GO:0031224 intrinsic component of membrane; GO:0005623 cell; GO:0016021 integral component of membrane; GO:0005886 plasma membrane;
P07237	Protein disulfide-isomerase OS=Homo sapiens OX=9606 GN=P4HB PE=1 SV=3	0.645	Down	0.000143146	P4HB	57.116	0.671	0.698	0.65	0.452	0.417	0.433	extracellular	GO:0065008 regulation of biological quality; GO:0010941 regulation of cell death; GO:0023051 regulation of signaling; GO:0044699 single-organism process; GO:0009058 biosynthetic process; GO:0044237 cellular metabolic process; GO:0042157 lipoprotein metabolic process; GO:0006457 protein folding; GO:2001233 regulation of apoptotic signaling pathway; GO:0008152 metabolic process; GO:0006520 cellular…	GO:0016020 membrane; GO:0044421 extracellular region part; GO:0005783 endoplasmic reticulum; GO:0009897 external side of plasma membrane; GO:0031410 cytoplasmic vesicle; GO:0030054 cell junction; GO:0071944 cell periphery; GO:0031982 vesicle; GO:0005737 cytoplasm; GO:0032991 macromolecular complex; GO:0044424 intracellular part; GO:0005623 cell; GO:0044422 organelle part; GO:0048770 pigment granu…	GO:0003723 RNA binding; GO:0046982 protein heterodimerization activity; GO:0005102 receptor binding; GO:0031543 peptidyl-proline dioxygenase activity; GO:0044877 macromolecular complex binding; GO:0046983 protein dimerization activity; GO:0016705 oxidoreductase activity, acting on paired donors, with incorporation or reduction of molecular oxygen; GO:0005178 integrin binding; GO:0005515 protein b…	K09580	PDIA1, P4HB; protein disulfide-isomerase A1 [EC:5.3.4.1]	hsa04141 Protein processing in endoplasmic reticulum - Homo sapiens (human);	IPR005788; IPR012336; IPR013766;	Disulphide isomerase; Thioredoxin-like fold; Thioredoxin domain;
A0A0C4DH68	Immunoglobulin kappa variable 2-24 OS=Homo sapiens OX=9606 GN=IGKV2-24 PE=3 SV=1	1.5	Up	0.0068829	IGKV2-24	13.079	0.823	0.758	0.849	1.213	1.221	1.211	extracellular	GO:0002376 immune system process; GO:0006955 immune response; GO:0050896 response to stimulus; GO:0002377 immunoglobulin production; GO:0002440 production of molecular mediator of immune response; GO:0002250 adaptive immune response;	GO:0016020 membrane; GO:0005615 extracellular space; GO:0044421 extracellular region part; GO:0044464 cell part; GO:0071944 cell periphery; GO:0005623 cell; GO:0005576 extracellular region; GO:0005886 plasma membrane;	GO:0005515 protein binding; GO:0003823 antigen binding; GO:0005488 binding;				IPR007110; IPR013783; IPR013106;	Immunoglobulin-like domain; Immunoglobulin-like fold; Immunoglobulin V-set domain;
P02753	Retinol-binding protein 4 OS=Homo sapiens OX=9606 GN=RBP4 PE=1 SV=3	0.688	Down	0.000177314	RBP4	23.01	1.44	1.396	1.385	1.016	0.936	0.951	extracellular	GO:0065008 regulation of biological quality; GO:0007586 digestion; GO:0060042 retina morphogenesis in camera-type eye; GO:0007601 visual perception; GO:0022414 reproductive process; GO:0006066 alcohol metabolic process; GO:0030323 respiratory tube development; GO:0043009 chordate embryonic development; GO:0050796 regulation of insulin secretion; GO:0042593 glucose homeostasis; GO:1901862 negative…	GO:0005615 extracellular space; GO:0044421 extracellular region part; GO:0005737 cytoplasm; GO:0031982 vesicle; GO:0032991 macromolecular complex; GO:0044424 intracellular part; GO:0005623 cell; GO:0005829 cytosol; GO:0005576 extracellular region; GO:0043226 organelle; GO:0070062 extracellular exosome; GO:0005622 intracellular; GO:0044464 cell part; GO:1903561 extracellular vesicle; GO:0043234 pr…	GO:0019842 vitamin binding; GO:0046982 protein heterodimerization activity; GO:0019841 retinol binding; GO:0046983 protein dimerization activity; GO:0005501 retinoid binding; GO:0005319 lipid transporter activity; GO:0022892 substrate-specific transporter activity; GO:0051183 vitamin transporter activity; GO:0005515 protein binding; GO:0019840 isoprenoid binding; GO:0034632 retinol transporter ac…	K18271	RBP4; retinol-binding protein 4		IPR000566; IPR012674; IPR011038;	Lipocalin/cytosolic fatty-acid binding domain; Calycin; Calycin-like;
P02746	Complement C1q subcomponent subunit B OS=Homo sapiens OX=9606 GN=C1QB PE=1 SV=3	1.986	Up	0.00048476	C1QB	26.721	0.797	0.723	0.778	1.348	1.588	1.627	extracellular	GO:0044707 single-multicellular organism process; GO:0016064 immunoglobulin mediated immune response; GO:0002252 immune effector process; GO:0044699 single-organism process; GO:0006959 humoral immune response; GO:0050896 response to stimulus; GO:0045087 innate immune response; GO:0019724 B cell mediated immunity; GO:0071704 organic substance metabolic process; GO:0006956 complement activation; GO…	GO:0070062 extracellular exosome; GO:0043226 organelle; GO:0072562 blood microparticle; GO:0005615 extracellular space; GO:0044421 extracellular region part; GO:0031982 vesicle; GO:1903561 extracellular vesicle; GO:0032991 macromolecular complex; GO:0005602 complement component C1 complex; GO:0043234 protein complex; GO:0043227 membrane-bounded organelle; GO:0005576 extracellular region; GO:00055…	GO:0004252 serine-type endopeptidase activity; GO:0004175 endopeptidase activity; GO:0008233 peptidase activity; GO:0042802 identical protein binding; GO:0003824 catalytic activity; GO:0017171 serine hydrolase activity; GO:0042803 protein homodimerization activity; GO:0005488 binding; GO:0046983 protein dimerization activity; GO:0008236 serine-type peptidase activity; GO:0070011 peptidase activit…	K03987	C1QB; complement C1q subcomponent subunit B	hsa04610 Complement and coagulation cascades - Homo sapiens (human); hsa05020 Prion diseases - Homo sapiens (human); hsa05133 Pertussis - Homo sapiens (human); hsa05142 Chagas disease (American trypanosomiasis) - Homo sapiens (human); hsa05150 Staphylococcus aureus infection - Homo sapiens (human); hsa05322 Systemic lupus erythematosus - Homo sapiens (human);	IPR008983; IPR001073;	Tumour necrosis factor-like domain; C1q domain;
Q9NQ79	Cartilage acidic protein 1 OS=Homo sapiens OX=9606 GN=CRTAC1 PE=1 SV=2	0.587	Down	0.009358	CRTAC1	71.42	1.758	1.777	1.795	1.091	1.1	0.938	extracellular	GO:0044707 single-multicellular organism process; GO:0016043 cellular component organization; GO:0021772 olfactory bulb development; GO:0007420 brain development; GO:0048666 neuron development; GO:0048869 cellular developmental process; GO:0044699 single-organism process; GO:0022008 neurogenesis; GO:0008038 neuron recognition; GO:0032091 negative regulation of protein binding; GO:0008037 cell rec…	GO:0042995 cell projection; GO:0044421 extracellular region part; GO:0031982 vesicle; GO:0030426 growth cone; GO:0044463 cell projection part; GO:0005623 cell; GO:0030427 site of polarized growth; GO:0005576 extracellular region; GO:0043226 organelle; GO:0070062 extracellular exosome; GO:0031012 extracellular matrix; GO:0044464 cell part; GO:1903561 extracellular vesicle; GO:0005578 proteinaceous…	GO:0043169 cation binding; GO:0046872 metal ion binding; GO:0005515 protein binding; GO:0005509 calcium ion binding; GO:0005488 binding; GO:0043167 ion binding;				IPR001881; IPR011519;	EGF-like calcium-binding domain; ASPIC/UnbV;
P07195	L-lactate dehydrogenase B chain OS=Homo sapiens OX=9606 GN=LDHB PE=1 SV=2	0.65	Down	0.00111788	LDHB	36.638	1.53	1.512	1.587	1.103	0.937	0.97	cytoplasm	GO:0019362 pyridine nucleotide metabolic process; GO:0006725 cellular aromatic compound metabolic process; GO:1901615 organic hydroxy compound metabolic process; GO:0046496 nicotinamide nucleotide metabolic process; GO:0009117 nucleotide metabolic process; GO:0044699 single-organism process; GO:0072524 pyridine-containing compound metabolic process; GO:0044237 cellular metabolic process; GO:00067…	GO:0043229 intracellular organelle; GO:0016020 membrane; GO:0044421 extracellular region part; GO:0098857 membrane microdomain; GO:0031982 vesicle; GO:0005737 cytoplasm; GO:0044424 intracellular part; GO:0005623 cell; GO:0005829 cytosol; GO:0005576 extracellular region; GO:0005739 mitochondrion; GO:0043231 intracellular membrane-bounded organelle; GO:0043226 organelle; GO:0070062 extracellular ex…	GO:1901265 nucleoside phosphate binding; GO:0005515 protein binding; GO:0000166 nucleotide binding; GO:0019900 kinase binding; GO:0048037 cofactor binding; GO:0016491 oxidoreductase activity; GO:0016614 oxidoreductase activity, acting on CH-OH group of donors; GO:1901363 heterocyclic compound binding; GO:0097159 organic cyclic compound binding; GO:0016616 oxidoreductase activity, acting on the CH…	K00016	LDH, ldh; L-lactate dehydrogenase [EC:1.1.1.27]	hsa00010 Glycolysis / Gluconeogenesis - Homo sapiens (human); hsa00270 Cysteine and methionine metabolism - Homo sapiens (human); hsa00620 Pyruvate metabolism - Homo sapiens (human); hsa00640 Propanoate metabolism - Homo sapiens (human); hsa01100 Metabolic pathways - Homo sapiens (human); hsa04922 Glucagon signaling pathway - Homo sapiens (human);	IPR022383; IPR016040; IPR001236; IPR015955;	Lactate/malate dehydrogenase, C-terminal; NAD(P)-binding domain; Lactate/malate dehydrogenase, N-terminal; Lactate dehydrogenase/glycoside hydrolase, family 4, C-terminal;
A0A087WSY6	Immunoglobulin kappa variable 3D-15 OS=Homo sapiens OX=9606 GN=IGKV3D-15 PE=3 SV=6	2.513	Up	0.025258	IGKV3D-15	12.534		0.731	0.541		1.619	1.577	extracellular	GO:0002376 immune system process; GO:0006955 immune response; GO:0050896 response to stimulus; GO:0002377 immunoglobulin production; GO:0002440 production of molecular mediator of immune response; GO:0002250 adaptive immune response;	GO:0016020 membrane; GO:0005615 extracellular space; GO:0044421 extracellular region part; GO:0044464 cell part; GO:0071944 cell periphery; GO:0005623 cell; GO:0005576 extracellular region; GO:0005886 plasma membrane;	GO:0005515 protein binding; GO:0003823 antigen binding; GO:0005488 binding;				IPR007110; IPR013783; IPR003599; IPR013106;	Immunoglobulin-like domain; Immunoglobulin-like fold; Immunoglobulin subtype; Immunoglobulin V-set domain;
O60673	DNA polymerase zeta catalytic subunit OS=Homo sapiens OX=9606 GN=REV3L PE=1 SV=2	0.616	Down	0.0096159	REV3L	352.77		1.056	1.151		0.694	0.666	nucleus	GO:0033554 cellular response to stress; GO:0006260 DNA replication; GO:0006725 cellular aromatic compound metabolic process; GO:0006259 DNA metabolic process; GO:0000731 DNA synthesis involved in DNA repair; GO:0009058 biosynthetic process; GO:0050896 response to stimulus; GO:0044237 cellular metabolic process; GO:0006301 postreplication repair; GO:0071704 organic substance metabolic process; GO:…	GO:0043229 intracellular organelle; GO:0061695 transferase complex, transferring phosphorus-containing groups; GO:0043232 intracellular non-membrane-bounded organelle; GO:0044446 intracellular organelle part; GO:0042575 DNA polymerase complex; GO:0032991 macromolecular complex; GO:0031981 nuclear lumen; GO:0044424 intracellular part; GO:1990234 transferase complex; GO:0005730 nucleolus; GO:000562…	GO:0003677 DNA binding; GO:1901265 nucleoside phosphate binding; GO:0043167 ion binding; GO:0008408 3'-5' exonuclease activity; GO:0005515 protein binding; GO:0016787 hydrolase activity; GO:0000166 nucleotide binding; GO:0051539 4 iron, 4 sulfur cluster binding; GO:1901363 heterocyclic compound binding; GO:0097159 organic cyclic compound binding; GO:0016779 nucleotidyltransferase activity; GO:000…	K02350	POLZ1, rev3; DNA polymerase zeta [EC:2.7.7.7]	hsa01100 Metabolic pathways - Homo sapiens (human); hsa01524 Platinum drug resistance - Homo sapiens (human); hsa03460 Fanconi anemia pathway - Homo sapiens (human);	IPR023211; IPR006133; IPR012337; IPR025687; IPR006134; IPR032757;	DNA polymerase, palm domain; DNA-directed DNA polymerase, family B, exonuclease domain; Ribonuclease H-like domain; C4-type zinc-finger of DNA polymerase delta; DNA-directed DNA polymerase, family B, multifunctional domain; Domain of unknown function DUF4683;
P46059	Solute carrier family 15 member 1 OS=Homo sapiens OX=9606 GN=SLC15A1 PE=2 SV=1	3.133	Up	0.00035527	SLC15A1	78.805		0.333	0.32		1.031	1.015	plasma membrane	GO:0044707 single-multicellular organism process; GO:0007586 digestion; GO:0044699 single-organism process; GO:0071702 organic substance transport; GO:0032501 multicellular organismal process; GO:0015031 protein transport; GO:0006818 hydrogen transport; GO:0015992 proton transport; GO:0051234 establishment of localization; GO:0006810 transport; GO:0045184 establishment of protein localization; GO…	GO:0016020 membrane; GO:0031226 intrinsic component of plasma membrane; GO:0098862 cluster of actin-based cell projections; GO:0044459 plasma membrane part; GO:0005903 brush border; GO:0044425 membrane part; GO:0071944 cell periphery; GO:0044464 cell part; GO:0031224 intrinsic component of membrane; GO:0005887 integral component of plasma membrane; GO:0005623 cell; GO:0016021 integral component o…	GO:0015294 solute:cation symporter activity; GO:0022804 active transmembrane transporter activity; GO:0015291 secondary active transmembrane transporter activity; GO:0005427 proton-dependent oligopeptide secondary active transmembrane transporter activity; GO:0015075 ion transmembrane transporter activity; GO:0042936 dipeptide transporter activity; GO:0015322 secondary active oligopeptide transme…	K14206	SLC15A1, PEPT1; solute carrier family 15 (oligopeptide transporter), member 1	hsa04974 Protein digestion and absorption - Homo sapiens (human);	IPR020846;	Major facilitator superfamily domain;
Q14974	Importin subunit beta-1 OS=Homo sapiens OX=9606 GN=KPNB1 PE=1 SV=2	0.53	Down	0.0053631	KPNB1	97.169	1.377	1.364	1.51	0.597	0.873	0.784	cytoplasm	GO:0044085 cellular component biogenesis; GO:0044700 single organism signaling; GO:0065008 regulation of biological quality; GO:0045321 leukocyte activation; GO:0051169 nuclear transport; GO:0044237 cellular metabolic process; GO:0015031 protein transport; GO:1902583 multi-organism intracellular transport; GO:0008152 metabolic process; GO:0031291 Ran protein signal transduction; GO:0044003 modifi…	GO:0034774 secretory granule lumen; GO:0016020 membrane; GO:0005783 endoplasmic reticulum; GO:0044421 extracellular region part; GO:0031090 organelle membrane; GO:0031410 cytoplasmic vesicle; GO:0031982 vesicle; GO:0005737 cytoplasm; GO:0044433 cytoplasmic vesicle part; GO:0032991 macromolecular complex; GO:0044424 intracellular part; GO:0005623 cell; GO:1904813 ficolin-1-rich granule lumen; GO:0…	GO:0031267 small GTPase binding; GO:0003723 RNA binding; GO:0031072 heat shock protein binding; GO:0008565 protein transporter activity; GO:0043167 ion binding; GO:0051879 Hsp90 protein binding; GO:0022892 substrate-specific transporter activity; GO:0005515 protein binding; GO:0033218 amide binding; GO:0008270 zinc ion binding; GO:0005048 signal sequence binding; GO:1901363 heterocyclic compound …	K14293	KPNB1, IPO1; importin subunit beta-1	hsa03013 RNA transport - Homo sapiens (human);	IPR001494; IPR011989; IPR016024;	Importin-beta, N-terminal domain; Armadillo-like helical; Armadillo-type fold;
Q99983	Osteomodulin OS=Homo sapiens OX=9606 GN=OMD PE=1 SV=1	0.578	Down	3.866e-06	OMD	49.492	1.525	1.441	1.474	0.842	0.867	0.856	plasma membrane	GO:0006024 glycosaminoglycan biosynthetic process; GO:0006026 aminoglycan catabolic process; GO:0044699 single-organism process; GO:0030500 regulation of bone mineralization; GO:0009058 biosynthetic process; GO:0042340 keratan sulfate catabolic process; GO:1901566 organonitrogen compound biosynthetic process; GO:0070167 regulation of biomineral tissue development; GO:0044237 cellular metabolic pr…	GO:0005615 extracellular space; GO:0044421 extracellular region part; GO:0005737 cytoplasm; GO:0031982 vesicle; GO:0044424 intracellular part; GO:0005623 cell; GO:0044422 organelle part; GO:0005775 vacuolar lumen; GO:0031974 membrane-enclosed lumen; GO:0070062 extracellular exosome; GO:0070013 intracellular organelle lumen; GO:0005622 intracellular; GO:0044464 cell part; GO:0005764 lysosome; GO:1…	GO:0005515 protein binding; GO:0005488 binding;	K08124	OMD; osteomodulin		IPR000372; IPR032675;	Leucine-rich repeat N-terminal domain; Leucine-rich repeat domain, L domain-like;
P02760	Protein AMBP OS=Homo sapiens OX=9606 GN=AMBP PE=1 SV=1	0.716	Down	4.4736e-05	AMBP	38.999	0.987	0.954	0.953	0.697	0.703	0.672	extracellular	GO:0032872 regulation of stress-activated MAPK cascade; GO:0009968 negative regulation of signal transduction; GO:0022414 reproductive process; GO:0023051 regulation of signaling; GO:0044699 single-organism process; GO:0044764 multi-organism cellular process; GO:0044237 cellular metabolic process; GO:0031400 negative regulation of protein modification process; GO:0051234 establishment of localiza…	GO:0043229 intracellular organelle; GO:0016020 membrane; GO:0005615 extracellular space; GO:0044421 extracellular region part; GO:0071944 cell periphery; GO:0031982 vesicle; GO:0044424 intracellular part; GO:0005623 cell; GO:0005576 extracellular region; GO:0005886 plasma membrane; GO:0043231 intracellular membrane-bounded organelle; GO:0043226 organelle; GO:0070062 extracellular exosome; GO:0072…	GO:0008200 ion channel inhibitor activity; GO:0019865 immunoglobulin binding; GO:0046983 protein dimerization activity; GO:0044877 macromolecular complex binding; GO:0061134 peptidase regulator activity; GO:0046904 calcium oxalate binding; GO:0099106 ion channel regulator activity; GO:0005515 protein binding; GO:0005246 calcium channel regulator activity; GO:0004857 enzyme inhibitor activity; GO:…				IPR000566; IPR012674; IPR011038; IPR002223;	Lipocalin/cytosolic fatty-acid binding domain; Calycin; Calycin-like; Pancreatic trypsin inhibitor Kunitz domain;
P04114	Apolipoprotein B-100 OS=Homo sapiens OX=9606 GN=APOB PE=1 SV=2	1.466	Up	8.6931e-07	APOB	515.6	0.868	0.855	0.853	1.276	1.253	1.247	endoplasmic reticulum	GO:0044700 single organism signaling; GO:0044085 cellular component biogenesis; GO:0010744 positive regulation of macrophage derived foam cell differentiation; GO:0065008 regulation of biological quality; GO:0022414 reproductive process; GO:0006066 alcohol metabolic process; GO:0043009 chordate embryonic development; GO:0034379 very-low-density lipoprotein particle assembly; GO:0044255 cellular l…	GO:0016020 membrane; GO:0044421 extracellular region part; GO:0045334 clathrin-coated endocytic vesicle; GO:0031090 organelle membrane; GO:0034362 low-density lipoprotein particle; GO:0005737 cytoplasm; GO:0044433 cytoplasmic vesicle part; GO:0034385 triglyceride-rich plasma lipoprotein particle; GO:0043025 neuronal cell body; GO:0032991 macromolecular complex; GO:0005623 cell; GO:0034361 very-lo…	GO:0035473 lipase binding; GO:0005102 receptor binding; GO:0043167 ion binding; GO:0005319 lipid transporter activity; GO:0022892 substrate-specific transporter activity; GO:0005515 protein binding; GO:0008201 heparin binding; GO:1901681 sulfur compound binding; GO:0070325 lipoprotein particle receptor binding; GO:0097367 carbohydrate derivative binding; GO:0017127 cholesterol transporter activit…	K14462	APOB; apolipoprotein B	hsa04975 Fat digestion and absorption - Homo sapiens (human); hsa04977 Vitamin digestion and absorption - Homo sapiens (human); hsa04979 Cholesterol metabolism - Homo sapiens (human);	IPR011030; IPR015817; IPR015818; IPR001747; IPR022176; IPR015819; IPR015816; IPR016024; IPR015255; IPR009454;	Vitellinogen, superhelical; Vitellinogen, open beta-sheet, subdomain 1; Vitellinogen, open beta-sheet, subdomain 2; Lipid transport protein, N-terminal; Apolipoprotein B100 C-terminal; Lipid transport protein, beta-sheet shell; Vitellinogen, beta-sheet N-terminal; Armadillo-type fold; Vitellinogen, open beta-sheet; Lipid transport, open beta-sheet;
P35527	"Keratin, type I cytoskeletal 9 OS=Homo sapiens OX=9606 GN=KRT9 PE=1 SV=3"	0.804	Down	0.017282	KRT9	62.064	0.876	0.833	0.879	0.733	0.727	0.622	nucleus	GO:0000003 reproduction; GO:0044707 single-multicellular organism process; GO:0016043 cellular component organization; GO:0045109 intermediate filament organization; GO:0022414 reproductive process; GO:0031424 keratinization; GO:0048869 cellular developmental process; GO:0044699 single-organism process; GO:0009913 epidermal cell differentiation; GO:0030154 cell differentiation; GO:0044702 single …	GO:0016020 membrane; GO:0005615 extracellular space; GO:0044421 extracellular region part; GO:0005737 cytoplasm; GO:0031982 vesicle; GO:0099512 supramolecular fiber; GO:0044424 intracellular part; GO:0099080 supramolecular complex; GO:0005623 cell; GO:0044422 organelle part; GO:0043228 non-membrane-bounded organelle; GO:0005856 cytoskeleton; GO:0070062 extracellular exosome; GO:0005622 intracellu…	GO:0005200 structural constituent of cytoskeleton; GO:0005198 structural molecule activity;	K07604	KRT1; type I keratin, acidic	hsa04915 Estrogen signaling pathway - Homo sapiens (human);
Q9HDC9	Adipocyte plasma membrane-associated protein OS=Homo sapiens OX=9606 GN=APMAP PE=1 SV=2	0.74	Down	0.018759	APMAP	46.48	0.803	0.846	0.87	0.543	0.613	0.708	plasma membrane	GO:0009058 biosynthetic process; GO:0008152 metabolic process;	GO:0043229 intracellular organelle; GO:0016020 membrane; GO:0005783 endoplasmic reticulum; GO:0044421 extracellular region part; GO:0005737 cytoplasm; GO:0031982 vesicle; GO:0031224 intrinsic component of membrane; GO:0012505 endomembrane system; GO:0044424 intracellular part; GO:0005623 cell; GO:0016021 integral component of membrane; GO:0005576 extracellular region; GO:0043226 organelle; GO:007…	GO:0016840 carbon-nitrogen lyase activity; GO:0052689 carboxylic ester hydrolase activity; GO:0004064 arylesterase activity; GO:0003824 catalytic activity; GO:0016788 hydrolase activity, acting on ester bonds; GO:0016844 strictosidine synthase activity; GO:0016829 lyase activity; GO:0016787 hydrolase activity; GO:0016843 amine-lyase activity;	K21407	APMAP; adipocyte plasma membrane-associated protein		IPR018119; IPR011042;	Strictosidine synthase, conserved region; Six-bladed beta-propeller, TolB-like;
Q6UVK1	Chondroitin sulfate proteoglycan 4 OS=Homo sapiens OX=9606 GN=CSPG4 PE=1 SV=2	0.698	Down	0.0037806	CSPG4	250.53	1.126	1.309	1.164	0.789	0.898	0.825	extracellular	GO:0044700 single organism signaling; GO:0032270 positive regulation of cellular protein metabolic process; GO:0007166 cell surface receptor signaling pathway; GO:0044237 cellular metabolic process; GO:0044272 sulfur compound biosynthetic process; GO:0030203 glycosaminoglycan metabolic process; GO:0071900 regulation of protein serine/threonine kinase activity; GO:0001525 angiogenesis; GO:0008152 …	GO:0016020 membrane; GO:0044421 extracellular region part; GO:0016324 apical plasma membrane; GO:0030054 cell junction; GO:0071944 cell periphery; GO:0031982 vesicle; GO:0005737 cytoplasm; GO:0031224 intrinsic component of membrane; GO:0044424 intracellular part; GO:0005887 integral component of plasma membrane; GO:0005623 cell; GO:0044422 organelle part; GO:0005775 vacuolar lumen; GO:0070062 ext…	GO:0005515 protein binding; GO:0019900 kinase binding; GO:0004871 signal transducer activity; GO:0005488 binding; GO:0019899 enzyme binding; GO:0019901 protein kinase binding;	K08115	CSPG4; chondroitin sulfate proteoglycan 4		IPR013320; IPR001791;	Concanavalin A-like lectin/glucanase domain; Laminin G domain;
Q06033	Inter-alpha-trypsin inhibitor heavy chain H3 OS=Homo sapiens OX=9606 GN=ITIH3 PE=1 SV=2	0.666	Down	0.00077934	ITIH3	99.848	0.78	0.811	0.794	0.531	0.529	0.529	endoplasmic reticulum	GO:0050794 regulation of cellular process; GO:0010951 negative regulation of endopeptidase activity; GO:0060255 regulation of macromolecule metabolic process; GO:0002576 platelet degranulation; GO:0044699 single-organism process; GO:0048523 negative regulation of cellular process; GO:0048519 negative regulation of biological process; GO:0031324 negative regulation of cellular metabolic process; G…	GO:0034774 secretory granule lumen; GO:0042827 platelet dense granule; GO:0044421 extracellular region part; GO:0031410 cytoplasmic vesicle; GO:0005737 cytoplasm; GO:0031982 vesicle; GO:0044433 cytoplasmic vesicle part; GO:0044424 intracellular part; GO:0005623 cell; GO:0044422 organelle part; GO:0031974 membrane-enclosed lumen; GO:0070062 extracellular exosome; GO:0031983 vesicle lumen; GO:00700…	GO:0004867 serine-type endopeptidase inhibitor activity; GO:0030234 enzyme regulator activity; GO:0030414 peptidase inhibitor activity; GO:0061134 peptidase regulator activity; GO:0061135 endopeptidase regulator activity; GO:0098772 molecular function regulator; GO:0004857 enzyme inhibitor activity; GO:0004866 endopeptidase inhibitor activity;				IPR010600; IPR013694; IPR002035;	Inter-alpha-trypsin inhibitor heavy chain, C-terminal; VIT domain; von Willebrand factor, type A;
P20742	Pregnancy zone protein OS=Homo sapiens OX=9606 GN=PZP PE=1 SV=4	1.455	Up	0.0080248	PZP	163.86	0.84	1.016	1.058	1.386	1.499	1.356	extracellular	GO:0000003 reproduction; GO:0050794 regulation of cellular process; GO:0010951 negative regulation of endopeptidase activity; GO:0022414 reproductive process; GO:0060255 regulation of macromolecule metabolic process; GO:0048523 negative regulation of cellular process; GO:0048519 negative regulation of biological process; GO:0031324 negative regulation of cellular metabolic process; GO:0051346 neg…	GO:0070062 extracellular exosome; GO:0043226 organelle; GO:0072562 blood microparticle; GO:0005615 extracellular space; GO:0044421 extracellular region part; GO:0031982 vesicle; GO:1903561 extracellular vesicle; GO:0043227 membrane-bounded organelle; GO:0005576 extracellular region; GO:0043230 extracellular organelle;	GO:0004867 serine-type endopeptidase inhibitor activity; GO:0030234 enzyme regulator activity; GO:0030414 peptidase inhibitor activity; GO:0061134 peptidase regulator activity; GO:0061135 endopeptidase regulator activity; GO:0098772 molecular function regulator; GO:0004857 enzyme inhibitor activity; GO:0004866 endopeptidase inhibitor activity;				IPR002890; IPR011625; IPR009048; IPR014756; IPR001599; IPR008930; IPR019565; IPR011626;	Alpha-2-macroglobulin, N-terminal; Alpha-2-macroglobulin, N-terminal 2; Alpha-macroglobulin, receptor-binding; Immunoglobulin E-set; Alpha-2-macroglobulin; Terpenoid cyclases/protein prenyltransferase alpha-alpha toroid; Alpha-2-macroglobulin, thiol-ester bond-forming; Alpha-macroglobulin complement component;
P01042	Kininogen-1 OS=Homo sapiens OX=9606 GN=KNG1 PE=1 SV=2	0.827	Down	0.008556	KNG1	71.957	1.275	1.174	1.194	0.954	0.998	1.06	extracellular	GO:0010941 regulation of cell death; GO:0007596 blood coagulation; GO:0065008 regulation of biological quality; GO:0072503 cellular divalent inorganic cation homeostasis; GO:0051241 negative regulation of multicellular organismal process; GO:0044699 single-organism process; GO:0051234 establishment of localization; GO:0097746 regulation of blood vessel diameter; GO:0009611 response to wounding; G…	GO:0034774 secretory granule lumen; GO:0016020 membrane; GO:0005615 extracellular space; GO:0044421 extracellular region part; GO:0031410 cytoplasmic vesicle; GO:0071944 cell periphery; GO:0005737 cytoplasm; GO:0031982 vesicle; GO:0044433 cytoplasmic vesicle part; GO:0044424 intracellular part; GO:0005623 cell; GO:0044422 organelle part; GO:0031974 membrane-enclosed lumen; GO:0070062 extracellula…	GO:0005102 receptor binding; GO:0061134 peptidase regulator activity; GO:0043167 ion binding; GO:0005515 protein binding; GO:0004857 enzyme inhibitor activity; GO:0098772 molecular function regulator; GO:0008201 heparin binding; GO:0008270 zinc ion binding; GO:0004866 endopeptidase inhibitor activity; GO:1901681 sulfur compound binding; GO:0004869 cysteine-type endopeptidase inhibitor activity; G…	K03898	KNG; kininogen	hsa04610 Complement and coagulation cascades - Homo sapiens (human);	IPR000010; IPR027358;	Cystatin domain; Kininogen-type cystatin domain;
Q71DI3	Histone H3.2 OS=Homo sapiens OX=9606 GN=HIST2H3A PE=1 SV=3	0.03	Down	0.0030198	HIST2H3A	15.388	4.581		4.75	0.169		0.115	nucleus	GO:0044085 cellular component biogenesis; GO:0007596 blood coagulation; GO:0065008 regulation of biological quality; GO:0044699 single-organism process; GO:0051253 negative regulation of RNA metabolic process; GO:0044237 cellular metabolic process; GO:0009611 response to wounding; GO:2001141 regulation of RNA biosynthetic process; GO:0008152 metabolic process; GO:0006334 nucleosome assembly; GO:0…	GO:0043229 intracellular organelle; GO:0044421 extracellular region part; GO:0043232 intracellular non-membrane-bounded organelle; GO:0031982 vesicle; GO:0044446 intracellular organelle part; GO:0031981 nuclear lumen; GO:0032991 macromolecular complex; GO:0044424 intracellular part; GO:0005623 cell; GO:0005576 extracellular region; GO:0044422 organelle part; GO:0044427 chromosomal part; GO:000078…	GO:0097159 organic cyclic compound binding; GO:1901363 heterocyclic compound binding; GO:0042393 histone binding; GO:0003677 DNA binding; GO:0046982 protein heterodimerization activity; GO:0005488 binding; GO:0046983 protein dimerization activity; GO:0003676 nucleic acid binding; GO:0005515 protein binding; GO:0003682 chromatin binding;	K11253	H3; histone H3	hsa05034 Alcoholism - Homo sapiens (human); hsa05202 Transcriptional misregulation in cancer - Homo sapiens (human); hsa05322 Systemic lupus erythematosus - Homo sapiens (human);	IPR009072; IPR007125;	Histone-fold; Histone H2A/H2B/H3;
P01860	Immunoglobulin heavy constant gamma 3 OS=Homo sapiens OX=9606 GN=IGHG3 PE=1 SV=2	1.966	Up	1.89164e-05	IGHG3	41.287	0.91	0.833	0.891	1.71	1.758	1.711	extracellular	GO:0044700 single organism signaling; GO:0002694 regulation of leukocyte activation; GO:0016064 immunoglobulin mediated immune response; GO:0065008 regulation of biological quality; GO:0007166 cell surface receptor signaling pathway; GO:0038094 Fc-gamma receptor signaling pathway; GO:0098542 defense response to other organism; GO:0044699 single-organism process; GO:0051249 regulation of lymphocyt…	GO:0016020 membrane; GO:0005615 extracellular space; GO:0044421 extracellular region part; GO:0009897 external side of plasma membrane; GO:0071944 cell periphery; GO:0042571 immunoglobulin complex, circulating; GO:0031982 vesicle; GO:0019814 immunoglobulin complex; GO:0032991 macromolecular complex; GO:0005623 cell; GO:0005576 extracellular region; GO:0005886 plasma membrane; GO:0070062 extracell…	GO:0004252 serine-type endopeptidase activity; GO:0004175 endopeptidase activity; GO:0008233 peptidase activity; GO:0005102 receptor binding; GO:0003824 catalytic activity; GO:0017171 serine hydrolase activity; GO:0005488 binding; GO:0008236 serine-type peptidase activity; GO:0070011 peptidase activity, acting on L-amino acid peptides; GO:0034987 immunoglobulin receptor binding; GO:0016787 hydrol…				IPR007110; IPR013783; IPR003597;	Immunoglobulin-like domain; Immunoglobulin-like fold; Immunoglobulin C1-set;
P07996	Thrombospondin-1 OS=Homo sapiens OX=9606 GN=THBS1 PE=1 SV=2	1.277	Up	0.000104961	THBS1	129.38	0.608	0.62	0.589	0.782	0.772	0.766	extracellular	GO:0002694 regulation of leukocyte activation; GO:0010941 regulation of cell death; GO:0032680 regulation of tumor necrosis factor production; GO:0010608 posttranscriptional regulation of gene expression; GO:1903318 negative regulation of protein maturation; GO:0009891 positive regulation of biosynthetic process; GO:2001026 regulation of endothelial cell chemotaxis; GO:0010748 negative regulation…	GO:0034774 secretory granule lumen; GO:0016020 membrane; GO:0005783 endoplasmic reticulum; GO:0005615 extracellular space; GO:0044421 extracellular region part; GO:0009897 external side of plasma membrane; GO:0031410 cytoplasmic vesicle; GO:0071944 cell periphery; GO:0031982 vesicle; GO:0005737 cytoplasm; GO:0044433 cytoplasmic vesicle part; GO:0032991 macromolecular complex; GO:0044424 intracell…	GO:0019838 growth factor binding; GO:0005102 receptor binding; GO:0005515 protein binding; GO:0005178 integrin binding; GO:0008201 heparin binding; GO:0001786 phosphatidylserine binding; GO:0050840 extracellular matrix binding; GO:0070051 fibrinogen binding; GO:0070052 collagen V binding; GO:0042802 identical protein binding; GO:0005488 binding; GO:0008289 lipid binding; GO:0043169 cation binding…	K16857	THBS1; thrombospondin 1	hsa04015 Rap1 signaling pathway - Homo sapiens (human); hsa04115 p53 signaling pathway - Homo sapiens (human); hsa04145 Phagosome - Homo sapiens (human); hsa04151 PI3K-Akt signaling pathway - Homo sapiens (human); hsa04350 TGF-beta signaling pathway - Homo sapiens (human); hsa04510 Focal adhesion - Homo sapiens (human); hsa04512 ECM-receptor interaction - Homo sapiens (human); hsa05144 Malaria - …	IPR001007; IPR001881; IPR008859; IPR000742; IPR001791; IPR013320;	VWFC domain; EGF-like calcium-binding domain; Thrombospondin, C-terminal; EGF-like domain; Laminin G domain; Concanavalin A-like lectin/glucanase domain;
P13727	Bone marrow proteoglycan OS=Homo sapiens OX=9606 GN=PRG2 PE=1 SV=2	0.598	Down	0.0079406	PRG2	25.205	1.231	1.231	1.257	0.73	0.688	0.805	extracellular	GO:0045321 leukocyte activation; GO:0098542 defense response to other organism; GO:0044699 single-organism process; GO:0051241 negative regulation of multicellular organismal process; GO:0001818 negative regulation of cytokine production; GO:0032753 positive regulation of interleukin-4 production; GO:0051234 establishment of localization; GO:0009607 response to biotic stimulus; GO:0009605 respons…	GO:0097708 intracellular vesicle; GO:0043229 intracellular organelle; GO:0044421 extracellular region part; GO:0031410 cytoplasmic vesicle; GO:0044446 intracellular organelle part; GO:0005737 cytoplasm; GO:0031982 vesicle; GO:0044433 cytoplasmic vesicle part; GO:0012505 endomembrane system; GO:0044424 intracellular part; GO:0005623 cell; GO:1904813 ficolin-1-rich granule lumen; GO:0005576 extrace…	GO:0030246 carbohydrate binding; GO:0097367 carbohydrate derivative binding; GO:0043168 anion binding; GO:0008201 heparin binding; GO:0005539 glycosaminoglycan binding; GO:1901681 sulfur compound binding; GO:0005488 binding; GO:0043167 ion binding;	K10786	PRG2, MBP; bone marrow proteoglycan	hsa05310 Asthma - Homo sapiens (human);	IPR001304; IPR016187; IPR033816; IPR016186;	C-type lectin-like; C-type lectin fold; Eosinophil major basic protein, C-type lectin-like domain; C-type lectin-like/link domain;
Q92820	Gamma-glutamyl hydrolase OS=Homo sapiens OX=9606 GN=GGH PE=1 SV=2	1.53	Up	0.03852	GGH	35.964	1.003		0.964	1.38		1.629	extracellular	GO:0045321 leukocyte activation; GO:0044699 single-organism process; GO:0044237 cellular metabolic process; GO:0051234 establishment of localization; GO:0008152 metabolic process; GO:0006520 cellular amino acid metabolic process; GO:0009719 response to endogenous stimulus; GO:0043170 macromolecule metabolic process; GO:0019538 protein metabolic process; GO:0010035 response to inorganic substance;…	GO:0034774 secretory granule lumen; GO:1904724 tertiary granule lumen; GO:0005615 extracellular space; GO:0044421 extracellular region part; GO:0031410 cytoplasmic vesicle; GO:0005737 cytoplasm; GO:0031982 vesicle; GO:0044433 cytoplasmic vesicle part; GO:0044424 intracellular part; GO:0035578 azurophil granule lumen; GO:0005623 cell; GO:0044422 organelle part; GO:0048770 pigment granule; GO:00057…	GO:0070011 peptidase activity, acting on L-amino acid peptides; GO:0008238 exopeptidase activity; GO:0016787 hydrolase activity; GO:0008233 peptidase activity; GO:0034722 gamma-glutamyl-peptidase activity; GO:0003824 catalytic activity; GO:0008242 omega peptidase activity;	K01307	GGH; gamma-glutamyl hydrolase [EC:3.4.19.9]	hsa00790 Folate biosynthesis - Homo sapiens (human); hsa01523 Antifolate resistance - Homo sapiens (human);	IPR029062;	Class I glutamine amidotransferase-like;
Q14520	Hyaluronan-binding protein 2 OS=Homo sapiens OX=9606 GN=HABP2 PE=1 SV=1	0.611	Down	0.000180355	HABP2	62.671	1.071	1.039	1.035	0.683	0.635	0.605	extracellular	GO:0007155 cell adhesion; GO:0022610 biological adhesion; GO:0006508 proteolysis; GO:0008152 metabolic process; GO:0043170 macromolecule metabolic process; GO:0019538 protein metabolic process; GO:0044238 primary metabolic process; GO:0071704 organic substance metabolic process;	GO:0005615 extracellular space; GO:0044421 extracellular region part; GO:0005576 extracellular region;	GO:0008233 peptidase activity; GO:0043167 ion binding; GO:0008236 serine-type peptidase activity; GO:0005515 protein binding; GO:0016787 hydrolase activity; GO:0004175 endopeptidase activity; GO:0004252 serine-type endopeptidase activity; GO:0097367 carbohydrate derivative binding; GO:0017171 serine hydrolase activity; GO:0003824 catalytic activity; GO:0005488 binding; GO:0070011 peptidase activi…	K08648	HABP2; hyaluronan binding protein 2 [EC:3.4.21.-]		IPR009003; IPR000001; IPR001254; IPR001881; IPR013806; IPR000742;	Peptidase S1, PA clan; Kringle; Serine proteases, trypsin domain; EGF-like calcium-binding domain; Kringle-like fold; EGF-like domain;
P08238	Heat shock protein HSP 90-beta OS=Homo sapiens OX=9606 GN=HSP90AB1 PE=1 SV=4	0.484	Down	0.00178016	HSP90AB1	83.263	1.214	1.287	1.106	0.485	0.643	0.619	cytoplasm	GO:0044700 single organism signaling; GO:0044085 cellular component biogenesis; GO:0010941 regulation of cell death; GO:0022414 reproductive process; GO:0043523 regulation of neuron apoptotic process; GO:0009891 positive regulation of biosynthetic process; GO:0031347 regulation of defense response; GO:0044237 cellular metabolic process; GO:0010564 regulation of cell cycle process; GO:0071900 regu…	GO:0016020 membrane; GO:0098862 cluster of actin-based cell projections; GO:0044421 extracellular region part; GO:0031090 organelle membrane; GO:0005737 cytoplasm; GO:0044433 cytoplasmic vesicle part; GO:0032991 macromolecular complex; GO:0097524 sperm plasma membrane; GO:0005623 cell; GO:1904813 ficolin-1-rich granule lumen; GO:0044422 organelle part; GO:0005765 lysosomal membrane; GO:0070062 ex…	GO:0001884 pyrimidine nucleoside binding; GO:0097159 organic cyclic compound binding; GO:0042826 histone deacetylase binding; GO:0032553 ribonucleotide binding; GO:0005488 binding; GO:0032550 purine ribonucleoside binding; GO:0043168 anion binding; GO:0032559 adenyl ribonucleotide binding; GO:0030554 adenyl nucleotide binding; GO:0019103 pyrimidine nucleotide binding; GO:0035639 purine ribonucleo…	K04079	HSP90A, htpG; molecular chaperone HtpG	hsa04141 Protein processing in endoplasmic reticulum - Homo sapiens (human); hsa04151 PI3K-Akt signaling pathway - Homo sapiens (human); hsa04217 Necroptosis - Homo sapiens (human); hsa04612 Antigen processing and presentation - Homo sapiens (human); hsa04621 NOD-like receptor signaling pathway - Homo sapiens (human); hsa04657 IL-17 signaling pathway - Homo sapiens (human); hsa04659 Th17 cell dif…	IPR020568; IPR020575; IPR003594;	Ribosomal protein S5 domain 2-type fold; Heat shock protein Hsp90, N-terminal; Histidine kinase-like ATPase, C-terminal domain;
P0DP04	Immunoglobulin heavy variable 3-43D OS=Homo sapiens OX=9606 GN=IGHV3-43D PE=3 SV=1	1.705	Up	0.00040357	IGHV3-43D	13.017	0.979	0.829	0.908	1.549	1.512	1.569	extracellular			GO:0005515 protein binding; GO:0005488 binding;				IPR007110; IPR013783; IPR013106;	Immunoglobulin-like domain; Immunoglobulin-like fold; Immunoglobulin V-set domain;
P0DJI9	Serum amyloid A-2 protein OS=Homo sapiens OX=9606 GN=SAA2 PE=1 SV=1	0.123	Down	0.0150619	SAA2	13.527	2.458	2.785	2.666	0.498	0.271	0.201	extracellular	GO:0016477 cell migration; GO:0051716 cellular response to stimulus; GO:0006950 response to stress; GO:0051674 localization of cell; GO:0044763 single-organism cellular process; GO:0044699 single-organism process; GO:0048870 cell motility; GO:0060326 cell chemotaxis; GO:0050896 response to stimulus; GO:0006935 chemotaxis; GO:0009605 response to external stimulus; GO:0042221 response to chemical; …	GO:0070062 extracellular exosome; GO:0043226 organelle; GO:0005615 extracellular space; GO:0044421 extracellular region part; GO:0032994 protein-lipid complex; GO:1990777 lipoprotein particle; GO:0034358 plasma lipoprotein particle; GO:0031982 vesicle; GO:1903561 extracellular vesicle; GO:0032991 macromolecular complex; GO:0034364 high-density lipoprotein particle; GO:0043227 membrane-bounded org…	GO:0042056 chemoattractant activity;	K17310	SAA; serum amyloid A protein
P06310	Immunoglobulin kappa variable 2-30 OS=Homo sapiens OX=9606 GN=IGKV2-30 PE=3 SV=2	0.116	Down	0.00184389	IGKV2-30	13.185	1.676	1.991	1.852	0.111	0.222	0.308	extracellular	GO:0044700 single organism signaling; GO:0016064 immunoglobulin mediated immune response; GO:0051674 localization of cell; GO:0007166 cell surface receptor signaling pathway; GO:0038094 Fc-gamma receptor signaling pathway; GO:0044699 single-organism process; GO:0006909 phagocytosis; GO:0051234 establishment of localization; GO:0006956 complement activation; GO:0007165 signal transduction; GO:0008…	GO:0016020 membrane; GO:0005615 extracellular space; GO:0044421 extracellular region part; GO:0071944 cell periphery; GO:0031982 vesicle; GO:0005623 cell; GO:0005576 extracellular region; GO:0005886 plasma membrane; GO:0043226 organelle; GO:0070062 extracellular exosome; GO:0072562 blood microparticle; GO:0044464 cell part; GO:1903561 extracellular vesicle; GO:0043227 membrane-bounded organelle; …	GO:0004252 serine-type endopeptidase activity; GO:0004175 endopeptidase activity; GO:0008233 peptidase activity; GO:0003824 catalytic activity; GO:0017171 serine hydrolase activity; GO:0005488 binding; GO:0008236 serine-type peptidase activity; GO:0070011 peptidase activity, acting on L-amino acid peptides; GO:0016787 hydrolase activity; GO:0005515 protein binding; GO:0003823 antigen binding;				IPR007110; IPR013783; IPR013106;	Immunoglobulin-like domain; Immunoglobulin-like fold; Immunoglobulin V-set domain;
A0A087WSY4	Immunoglobulin heavy variable 4-30-2 OS=Homo sapiens OX=9606 GN=IGHV4-30-2 PE=3 SV=1	2.736	Up	6.2366e-05	IGHV4-30-2	13.025	0.793	0.741	0.834	2.055	2.366	2.058	extracellular	GO:0044700 single organism signaling; GO:0002694 regulation of leukocyte activation; GO:0016064 immunoglobulin mediated immune response; GO:0007166 cell surface receptor signaling pathway; GO:0098542 defense response to other organism; GO:0044699 single-organism process; GO:0051249 regulation of lymphocyte activation; GO:0009607 response to biotic stimulus; GO:0051234 establishment of localizatio…	GO:0016020 membrane; GO:0044421 extracellular region part; GO:0005615 extracellular space; GO:0009897 external side of plasma membrane; GO:0071944 cell periphery; GO:0042571 immunoglobulin complex, circulating; GO:0019814 immunoglobulin complex; GO:0032991 macromolecular complex; GO:0005623 cell; GO:0005576 extracellular region; GO:0005886 plasma membrane; GO:0072562 blood microparticle; GO:00444…	GO:0034987 immunoglobulin receptor binding; GO:0005515 protein binding; GO:0005102 receptor binding; GO:0003823 antigen binding; GO:0005488 binding;	K06856	IGH; immunoglobulin heavy chain	hsa04020 Calcium signaling pathway - Homo sapiens (human); hsa04064 NF-kappa B signaling pathway - Homo sapiens (human); hsa04072 Phospholipase D signaling pathway - Homo sapiens (human); hsa04145 Phagosome - Homo sapiens (human); hsa04151 PI3K-Akt signaling pathway - Homo sapiens (human); hsa04640 Hematopoietic cell lineage - Homo sapiens (human); hsa04650 Natural killer cell mediated cytotoxici…	IPR007110; IPR013783; IPR013106;	Immunoglobulin-like domain; Immunoglobulin-like fold; Immunoglobulin V-set domain;
P63267	"Actin, gamma-enteric smooth muscle OS=Homo sapiens OX=9606 GN=ACTG2 PE=1 SV=1"	4.221	Up	0.0134958	ACTG2	41.876	0.335	0.261		1.401	1.115		cytoskeleton	GO:0032502 developmental process; GO:0044707 single-multicellular organism process; GO:0010468 regulation of gene expression; GO:0090130 tissue migration; GO:0003012 muscle system process; GO:0009888 tissue development; GO:0003008 system process; GO:0060485 mesenchyme development; GO:0048731 system development; GO:0060255 regulation of macromolecule metabolic process; GO:0044699 single-organism p…	GO:0005615 extracellular space; GO:0044421 extracellular region part; GO:0071944 cell periphery; GO:0031982 vesicle; GO:0005737 cytoplasm; GO:0032991 macromolecular complex; GO:0044424 intracellular part; GO:0098858 actin-based cell projection; GO:0005623 cell; GO:0044422 organelle part; GO:0043228 non-membrane-bounded organelle; GO:0005856 cytoskeleton; GO:0070062 extracellular exosome; GO:00444…	GO:0005524 ATP binding; GO:1901265 nucleoside phosphate binding; GO:0001882 nucleoside binding; GO:0043167 ion binding; GO:0000166 nucleotide binding; GO:0097159 organic cyclic compound binding; GO:1901363 heterocyclic compound binding; GO:0032549 ribonucleoside binding; GO:0097367 carbohydrate derivative binding; GO:0032553 ribonucleotide binding; GO:0005488 binding; GO:0032550 purine ribonucleo…	K12315	ACTG2; actin, gamma-enteric smooth muscle	hsa04270 Vascular smooth muscle contraction - Homo sapiens (human);
P07358	Complement component C8 beta chain OS=Homo sapiens OX=9606 GN=C8B PE=1 SV=3	1.557	Up	0.000155384	C8B	67.046	0.876	0.857	0.85	1.42	1.284	1.317	extracellular	GO:0030449 regulation of complement activation; GO:0016064 immunoglobulin mediated immune response; GO:0019835 cytolysis; GO:2000257 regulation of protein activation cascade; GO:0002252 immune effector process; GO:0060255 regulation of macromolecule metabolic process; GO:0002920 regulation of humoral immune response; GO:0002673 regulation of acute inflammatory response; GO:0006959 humoral immune …	GO:0016020 membrane; GO:0031226 intrinsic component of plasma membrane; GO:0005615 extracellular space; GO:0044421 extracellular region part; GO:0098796 membrane protein complex; GO:0071944 cell periphery; GO:0046930 pore complex; GO:0098797 plasma membrane protein complex; GO:0031982 vesicle; GO:0032991 macromolecular complex; GO:0031224 intrinsic component of membrane; GO:0005887 integral compo…	GO:0005515 protein binding; GO:0005488 binding; GO:0032403 protein complex binding; GO:0044877 macromolecular complex binding;	K03998	C8B; complement component 8 subunit beta	hsa04610 Complement and coagulation cascades - Homo sapiens (human); hsa05020 Prion diseases - Homo sapiens (human); hsa05146 Amoebiasis - Homo sapiens (human); hsa05322 Systemic lupus erythematosus - Homo sapiens (human);	IPR020864;	Membrane attack complex component/perforin (MACPF) domain;
P32119	Peroxiredoxin-2 OS=Homo sapiens OX=9606 GN=PRDX2 PE=1 SV=5	1.38	Up	0.00096437	PRDX2	21.892	1.099	1.169	1.12	1.54	1.481	1.653	cytoplasm	GO:0006801 superoxide metabolic process; GO:0050794 regulation of cellular process; GO:0033554 cellular response to stress; GO:0010941 regulation of cell death; GO:0000303 response to superoxide; GO:0065008 regulation of biological quality; GO:0043069 negative regulation of programmed cell death; GO:0045454 cell redox homeostasis; GO:0043067 regulation of programmed cell death; GO:1901700 respons…	GO:0044421 extracellular region part; GO:0031982 vesicle; GO:0005737 cytoplasm; GO:0044424 intracellular part; GO:0005623 cell; GO:0005829 cytosol; GO:0005576 extracellular region; GO:0043226 organelle; GO:0070062 extracellular exosome; GO:0005622 intracellular; GO:0044464 cell part; GO:1903561 extracellular vesicle; GO:0043227 membrane-bounded organelle; GO:0043230 extracellular organelle; GO:00…	GO:0003824 catalytic activity; GO:0008379 thioredoxin peroxidase activity; GO:0051920 peroxiredoxin activity; GO:0016209 antioxidant activity; GO:0004601 peroxidase activity; GO:0016491 oxidoreductase activity; GO:0016684 oxidoreductase activity, acting on peroxide as acceptor;	K03386	PRDX2_4, ahpC; peroxiredoxin (alkyl hydroperoxide reductase subunit C) [EC:1.11.1.15]		IPR019479; IPR000866; IPR013766; IPR012336;	Peroxiredoxin, C-terminal; Alkyl hydroperoxide reductase subunit C/ Thiol specific antioxidant; Thioredoxin domain; Thioredoxin-like fold;
P63104	14-3-3 protein zeta/delta OS=Homo sapiens OX=9606 GN=YWHAZ PE=1 SV=1	0.248	Down	0.00026281	YWHAZ	27.745	1.866	1.973	2.044	0.598	0.411	0.45	cytoplasm	GO:0044700 single organism signaling; GO:0044085 cellular component biogenesis; GO:0010256 endomembrane system organization; GO:0065008 regulation of biological quality; GO:0007596 blood coagulation; GO:0010941 regulation of cell death; GO:0010608 posttranscriptional regulation of gene expression; GO:0006839 mitochondrial transport; GO:0023051 regulation of signaling; GO:0044699 single-organism p…	GO:0016020 membrane; GO:0005615 extracellular space; GO:0044421 extracellular region part; GO:0031090 organelle membrane; GO:0031410 cytoplasmic vesicle; GO:0030054 cell junction; GO:0005737 cytoplasm; GO:0031982 vesicle; GO:0044433 cytoplasmic vesicle part; GO:0044424 intracellular part; GO:0005623 cell; GO:0044422 organelle part; GO:0048770 pigment granule; GO:0031974 membrane-enclosed lumen; G…	GO:0003723 RNA binding; GO:0031625 ubiquitin protein ligase binding; GO:0019901 protein kinase binding; GO:0005515 protein binding; GO:0019900 kinase binding; GO:1901363 heterocyclic compound binding; GO:0097159 organic cyclic compound binding; GO:0050839 cell adhesion molecule binding; GO:0042802 identical protein binding; GO:0005488 binding; GO:0003676 nucleic acid binding; GO:0045296 cadherin …	K16197	YWHAB_Q_Z; 14-3-3 protein beta/theta/zeta	hsa04110 Cell cycle - Homo sapiens (human); hsa04114 Oocyte meiosis - Homo sapiens (human); hsa04151 PI3K-Akt signaling pathway - Homo sapiens (human); hsa04390 Hippo signaling pathway - Homo sapiens (human); hsa05130 Pathogenic Escherichia coli infection - Homo sapiens (human); hsa05161 Hepatitis B - Homo sapiens (human); hsa05203 Viral carcinogenesis - Homo sapiens (human);	IPR023410;	14-3-3 domain;
P0DPH8	Tubulin alpha-3D chain OS=Homo sapiens OX=9606 GN=TUBA3D PE=1 SV=1	0.362	Down	0.0020837	TUBA3D	49.959	1.654		1.593	0.563		0.613	cytoskeleton	GO:0007017 microtubule-based process; GO:0009987 cellular process;	GO:0043229 intracellular organelle; GO:0099513 polymeric cytoskeletal fiber; GO:0005874 microtubule; GO:0043232 intracellular non-membrane-bounded organelle; GO:0044430 cytoskeletal part; GO:0044446 intracellular organelle part; GO:0099512 supramolecular fiber; GO:0044424 intracellular part; GO:0005623 cell; GO:0099080 supramolecular complex; GO:0044422 organelle part; GO:0099081 supramolecular p…	GO:1901265 nucleoside phosphate binding; GO:0001882 nucleoside binding; GO:0043167 ion binding; GO:0016817 hydrolase activity, acting on acid anhydrides; GO:0016787 hydrolase activity; GO:0000166 nucleotide binding; GO:0017111 nucleoside-triphosphatase activity; GO:0097159 organic cyclic compound binding; GO:1901363 heterocyclic compound binding; GO:0032549 ribonucleoside binding; GO:0097367 carb…	K07374	TUBA; tubulin alpha	hsa04145 Phagosome - Homo sapiens (human); hsa04210 Apoptosis - Homo sapiens (human); hsa04530 Tight junction - Homo sapiens (human); hsa04540 Gap junction - Homo sapiens (human); hsa05130 Pathogenic Escherichia coli infection - Homo sapiens (human);	IPR003008; IPR023123; IPR008280; IPR018316;	Tubulin/FtsZ, GTPase domain; Tubulin, C-terminal; Tubulin/FtsZ, C-terminal; Tubulin/FtsZ, 2-layer sandwich domain;
P02649	Apolipoprotein E OS=Homo sapiens OX=9606 GN=APOE PE=1 SV=1	0.598	Down	1.72851e-05	APOE	36.154	1.185	1.139	1.162	0.698	0.713	0.673	extracellular	GO:0044700 single organism signaling; GO:1902430 negative regulation of beta-amyloid formation; GO:0006066 alcohol metabolic process; GO:0044255 cellular lipid metabolic process; GO:0044237 cellular metabolic process; GO:0001558 regulation of cell growth; GO:0046461 neutral lipid catabolic process; GO:0071900 regulation of protein serine/threonine kinase activity; GO:0055065 metal ion homeostasis…	GO:0016020 membrane; GO:0030425 dendrite; GO:0005783 endoplasmic reticulum; GO:0044421 extracellular region part; GO:0005615 extracellular space; GO:0031410 cytoplasmic vesicle; GO:0071944 cell periphery; GO:0034362 low-density lipoprotein particle; GO:0031982 vesicle; GO:0005737 cytoplasm; GO:0034358 plasma lipoprotein particle; GO:0044433 cytoplasmic vesicle part; GO:0043025 neuronal cell body;…	GO:0032934 sterol binding; GO:0070326 very-low-density lipoprotein particle receptor binding; GO:0005102 receptor binding; GO:0046983 protein dimerization activity; GO:0005319 lipid transporter activity; GO:0022892 substrate-specific transporter activity; GO:0005515 protein binding; GO:0008201 heparin binding; GO:0098772 molecular function regulator; GO:0005496 steroid binding; GO:0097159 organic…	K04524	APOE; apolipoprotein E	hsa04979 Cholesterol metabolism - Homo sapiens (human); hsa05010 Alzheimer disease - Homo sapiens (human);
P13987	CD59 glycoprotein OS=Homo sapiens OX=9606 GN=CD59 PE=1 SV=1	0.78	Down	0.0131795	CD59	14.177	1.387	1.218	1.421	1.08	1.082	0.979	extracellular	GO:0044700 single organism signaling; GO:0044085 cellular component biogenesis; GO:0002694 regulation of leukocyte activation; GO:0010941 regulation of cell death; GO:0007596 blood coagulation; GO:0065008 regulation of biological quality; GO:0045321 leukocyte activation; GO:0032944 regulation of mononuclear cell proliferation; GO:0048208 COPII vesicle coating; GO:0007166 cell surface receptor sig…	GO:0016020 membrane; GO:0044421 extracellular region part; GO:0009897 external side of plasma membrane; GO:0031090 organelle membrane; GO:0005737 cytoplasm; GO:0044433 cytoplasmic vesicle part; GO:0005623 cell; GO:0044422 organelle part; GO:0070062 extracellular exosome; GO:0005925 focal adhesion; GO:0005622 intracellular; GO:0043209 myelin sheath; GO:0099503 secretory vesicle; GO:0030055 cell-su…	GO:0001848 complement binding; GO:0005515 protein binding; GO:0005488 binding;	K04008	CD59; CD59 antigen	hsa04610 Complement and coagulation cascades - Homo sapiens (human); hsa04640 Hematopoietic cell lineage - Homo sapiens (human);	IPR016054;	Ly-6 antigen/uPA receptor-like;
Q9NUV7	Serine palmitoyltransferase 3 OS=Homo sapiens OX=9606 GN=SPTLC3 PE=1 SV=3	2.029	Up	0.0061558	SPTLC3	62.049	0.57		0.635	1.24		1.205	nucleus	GO:0046519 sphingoid metabolic process; GO:0044711 single-organism biosynthetic process; GO:0006643 membrane lipid metabolic process; GO:0044763 single-organism cellular process; GO:0044699 single-organism process; GO:0097164 ammonium ion metabolic process; GO:0006807 nitrogen compound metabolic process; GO:0044255 cellular lipid metabolic process; GO:0009058 biosynthetic process; GO:0044238 prim…	GO:0002178 palmitoyltransferase complex; GO:0043229 intracellular organelle; GO:0016020 membrane; GO:0042175 nuclear outer membrane-endoplasmic reticulum membrane network; GO:0005783 endoplasmic reticulum; GO:0044446 intracellular organelle part; GO:0005737 cytoplasm; GO:0032991 macromolecular complex; GO:0031224 intrinsic component of membrane; GO:0012505 endomembrane system; GO:0044424 intracel…	GO:0097159 organic cyclic compound binding; GO:1901363 heterocyclic compound binding; GO:0016746 transferase activity, transferring acyl groups; GO:0003824 catalytic activity; GO:0005488 binding; GO:0043167 ion binding; GO:0043168 anion binding; GO:0004758 serine C-palmitoyltransferase activity; GO:0016408 C-acyltransferase activity; GO:0016409 palmitoyltransferase activity; GO:0016454 C-palmitoy…	K00654	SPT; serine palmitoyltransferase [EC:2.3.1.50]	hsa00600 Sphingolipid metabolism - Homo sapiens (human); hsa01100 Metabolic pathways - Homo sapiens (human); hsa04071 Sphingolipid signaling pathway - Homo sapiens (human);	IPR015424; IPR004839; IPR015421; IPR015422;	Pyridoxal phosphate-dependent transferase; Aminotransferase, class I/classII; Pyridoxal phosphate-dependent transferase, major region, subdomain 1; Pyridoxal phosphate-dependent transferase, major region, subdomain 2;
P02745	Complement C1q subcomponent subunit A OS=Homo sapiens OX=9606 GN=C1QA PE=1 SV=2	1.663	Up	0.00189543	C1QA	26.016	0.895	0.793	0.884	1.339	1.596	1.343	extracellular	GO:0044700 single organism signaling; GO:0016064 immunoglobulin mediated immune response; GO:0002252 immune effector process; GO:0044699 single-organism process; GO:0006959 humoral immune response; GO:0050896 response to stimulus; GO:0045087 innate immune response; GO:0019724 B cell mediated immunity; GO:0071704 organic substance metabolic process; GO:0006956 complement activation; GO:0008152 met…	GO:0070062 extracellular exosome; GO:0043226 organelle; GO:0005615 extracellular space; GO:0044421 extracellular region part; GO:0031982 vesicle; GO:1903561 extracellular vesicle; GO:0032991 macromolecular complex; GO:0005602 complement component C1 complex; GO:0043234 protein complex; GO:0043227 membrane-bounded organelle; GO:0005576 extracellular region; GO:0005581 collagen trimer; GO:0043230 e…	GO:0004252 serine-type endopeptidase activity; GO:0004175 endopeptidase activity; GO:0008233 peptidase activity; GO:0003824 catalytic activity; GO:0017171 serine hydrolase activity; GO:0005488 binding; GO:0008236 serine-type peptidase activity; GO:0070011 peptidase activity, acting on L-amino acid peptides; GO:0005515 protein binding; GO:0016787 hydrolase activity;	K03986	C1QA; complement C1q subcomponent subunit A	hsa04610 Complement and coagulation cascades - Homo sapiens (human); hsa05020 Prion diseases - Homo sapiens (human); hsa05133 Pertussis - Homo sapiens (human); hsa05142 Chagas disease (American trypanosomiasis) - Homo sapiens (human); hsa05150 Staphylococcus aureus infection - Homo sapiens (human); hsa05322 Systemic lupus erythematosus - Homo sapiens (human);	IPR008983; IPR001073;	Tumour necrosis factor-like domain; C1q domain;
A0A0A0MS15	Immunoglobulin heavy variable 3-49 OS=Homo sapiens OX=9606 GN=IGHV3-49 PE=3 SV=1	1.565	Up	0.035243	IGHV3-49	13.056	0.824	0.634	0.496	1.073	1.02	0.965	extracellular	GO:0044700 single organism signaling; GO:0002694 regulation of leukocyte activation; GO:0016064 immunoglobulin mediated immune response; GO:0007166 cell surface receptor signaling pathway; GO:0098542 defense response to other organism; GO:0044699 single-organism process; GO:0051249 regulation of lymphocyte activation; GO:0009607 response to biotic stimulus; GO:0051234 establishment of localizatio…	GO:0016020 membrane; GO:0044421 extracellular region part; GO:0005615 extracellular space; GO:0009897 external side of plasma membrane; GO:0071944 cell periphery; GO:0042571 immunoglobulin complex, circulating; GO:0019814 immunoglobulin complex; GO:0032991 macromolecular complex; GO:0005623 cell; GO:0005576 extracellular region; GO:0005886 plasma membrane; GO:0072562 blood microparticle; GO:00444…	GO:0034987 immunoglobulin receptor binding; GO:0005515 protein binding; GO:0005102 receptor binding; GO:0003823 antigen binding; GO:0005488 binding;				IPR007110; IPR013783; IPR013106;	Immunoglobulin-like domain; Immunoglobulin-like fold; Immunoglobulin V-set domain;
P02671	Fibrinogen alpha chain OS=Homo sapiens OX=9606 GN=FGA PE=1 SV=2	1.41	Up	4.316e-06	FGA	94.972	0.777	0.777	0.767	1.112	1.07	1.091	extracellular	GO:0044085 cellular component biogenesis; GO:0044700 single organism signaling; GO:0010941 regulation of cell death; GO:0072377 blood coagulation, common pathway; GO:0098542 defense response to other organism; GO:0002793 positive regulation of peptide secretion; GO:0031347 regulation of defense response; GO:0043152 induction of bacterial agglutination; GO:0044237 cellular metabolic process; GO:00…	GO:0034774 secretory granule lumen; GO:0016020 membrane; GO:0005615 extracellular space; GO:0044421 extracellular region part; GO:0005938 cell cortex; GO:0009897 external side of plasma membrane; GO:0031410 cytoplasmic vesicle; GO:0071944 cell periphery; GO:0031982 vesicle; GO:0005737 cytoplasm; GO:0099568 cytoplasmic region; GO:0044433 cytoplasmic vesicle part; GO:0032991 macromolecular complex;…	GO:0030674 protein binding, bridging; GO:0005102 receptor binding; GO:0005488 binding; GO:0043167 ion binding; GO:0043169 cation binding; GO:0046872 metal ion binding; GO:0005515 protein binding; GO:0060090 binding, bridging; GO:0005198 structural molecule activity;	K03903	FGA; fibrinogen alpha chain	hsa04610 Complement and coagulation cascades - Homo sapiens (human); hsa04611 Platelet activation - Homo sapiens (human);	IPR002181; IPR021996; IPR012290; IPR014716; IPR014715;	Fibrinogen, alpha/beta/gamma chain, C-terminal globular domain; Fibrinogen alpha C domain; Fibrinogen, alpha/beta/gamma chain, coiled coil domain; Fibrinogen, alpha/beta/gamma chain, C-terminal globular, subdomain 1; Fibrinogen, alpha/beta/gamma chain, C-terminal globular, subdomain 2;
P60953	Cell division control protein 42 homolog OS=Homo sapiens OX=9606 GN=CDC42 PE=1 SV=2	0.567	Down	0.031317	CDC42	21.258	1.375	1.387	1.319	0.736	0.927	0.651	cytoplasm	GO:0044700 single organism signaling; GO:0044085 cellular component biogenesis; GO:0002694 regulation of leukocyte activation; GO:0010941 regulation of cell death; GO:0046847 filopodium assembly; GO:0032872 regulation of stress-activated MAPK cascade; GO:0048732 gland development; GO:0031424 keratinization; GO:1901185 negative regulation of ERBB signaling pathway; GO:0009891 positive regulation o…	GO:0030425 dendrite; GO:0016020 membrane; GO:0044421 extracellular region part; GO:0051233 spindle midzone; GO:0031090 organelle membrane; GO:0005737 cytoplasm; GO:0043025 neuronal cell body; GO:0032991 macromolecular complex; GO:0098858 actin-based cell projection; GO:0000322 storage vacuole; GO:0005623 cell; GO:0043197 dendritic spine; GO:0044422 organelle part; GO:0043228 non-membrane-bounded …	GO:1901265 nucleoside phosphate binding; GO:0005102 receptor binding; GO:0019901 protein kinase binding; GO:0034191 apolipoprotein A-I receptor binding; GO:0016817 hydrolase activity, acting on acid anhydrides; GO:0016787 hydrolase activity; GO:0005515 protein binding; GO:0031996 thioesterase binding; GO:1901363 heterocyclic compound binding; GO:0097159 organic cyclic compound binding; GO:0061630…	K04393	CDC42; cell division control protein 42	hsa04010 MAPK signaling pathway - Homo sapiens (human); hsa04014 Ras signaling pathway - Homo sapiens (human); hsa04015 Rap1 signaling pathway - Homo sapiens (human); hsa04062 Chemokine signaling pathway - Homo sapiens (human); hsa04144 Endocytosis - Homo sapiens (human); hsa04360 Axon guidance - Homo sapiens (human); hsa04370 VEGF signaling pathway - Homo sapiens (human); hsa04510 Focal adhesion…	IPR005225; IPR027417;	Small GTP-binding protein domain; P-loop containing nucleoside triphosphate hydrolase;
P01871	Immunoglobulin heavy constant mu OS=Homo sapiens OX=9606 GN=IGHM PE=1 SV=4	0.533	Down	0.00054458	IGHM	49.439	1.071	1.057	0.993	0.495	0.564	0.604	nucleus	GO:0044700 single organism signaling; GO:0002694 regulation of leukocyte activation; GO:0016064 immunoglobulin mediated immune response; GO:0051674 localization of cell; GO:0007166 cell surface receptor signaling pathway; GO:0098542 defense response to other organism; GO:0044699 single-organism process; GO:0051249 regulation of lymphocyte activation; GO:0009607 response to biotic stimulus; GO:005…	GO:0016020 membrane; GO:0071756 pentameric IgM immunoglobulin complex; GO:0044421 extracellular region part; GO:0005615 extracellular space; GO:0009897 external side of plasma membrane; GO:0071944 cell periphery; GO:0042571 immunoglobulin complex, circulating; GO:0031982 vesicle; GO:0019814 immunoglobulin complex; GO:0031224 intrinsic component of membrane; GO:0032991 macromolecular complex; GO:0…	GO:0005515 protein binding; GO:0003823 antigen binding; GO:0005488 binding;	K06752	MHC2; major histocompatibility complex, class II	hsa04145 Phagosome - Homo sapiens (human); hsa04514 Cell adhesion molecules (CAMs) - Homo sapiens (human); hsa04612 Antigen processing and presentation - Homo sapiens (human); hsa04640 Hematopoietic cell lineage - Homo sapiens (human); hsa04658 Th1 and Th2 cell differentiation - Homo sapiens (human); hsa04659 Th17 cell differentiation - Homo sapiens (human); hsa04672 Intestinal immune network for…	IPR007110; IPR013783; IPR003597;	Immunoglobulin-like domain; Immunoglobulin-like fold; Immunoglobulin C1-set;
O00592	Podocalyxin OS=Homo sapiens OX=9606 GN=PODXL PE=1 SV=2	0.796	Down	0.021899	PODXL	58.635	0.911	0.838	0.822	0.68	0.619	0.748	endoplasmic reticulum	GO:0030335 positive regulation of cell migration; GO:0051674 localization of cell; GO:0060491 regulation of cell projection assembly; GO:0035148 tube formation; GO:0040017 positive regulation of locomotion; GO:0048869 cellular developmental process; GO:0044699 single-organism process; GO:0022610 biological adhesion; GO:0048729 tissue morphogenesis; GO:0032879 regulation of localization; GO:000715…	GO:0016020 membrane; GO:0005615 extracellular space; GO:0044421 extracellular region part; GO:0016324 apical plasma membrane; GO:0098857 membrane microdomain; GO:0030054 cell junction; GO:0071944 cell periphery; GO:0036057 slit diaphragm; GO:0031982 vesicle; GO:0005737 cytoplasm; GO:0031224 intrinsic component of membrane; GO:0044424 intracellular part; GO:0005887 integral component of plasma mem…	GO:0005515 protein binding; GO:0005488 binding;	K06817	PODXL; podocalyxin-like
P43652	Afamin OS=Homo sapiens OX=9606 GN=AFM PE=1 SV=1	1.248	Up	0.0042232	AFM	69.068	1.138	1.274	1.143	1.483	1.454	1.5	extracellular	GO:0006810 transport; GO:1902578 single-organism localization; GO:0044699 single-organism process; GO:0051180 vitamin transport; GO:0051179 localization; GO:0051234 establishment of localization; GO:0044765 single-organism transport;	GO:0070062 extracellular exosome; GO:0043226 organelle; GO:0072562 blood microparticle; GO:0005615 extracellular space; GO:0044421 extracellular region part; GO:0031982 vesicle; GO:1903561 extracellular vesicle; GO:0043227 membrane-bounded organelle; GO:0005576 extracellular region; GO:0043230 extracellular organelle;	GO:0097159 organic cyclic compound binding; GO:1901363 heterocyclic compound binding; GO:0008431 vitamin E binding; GO:0019842 vitamin binding; GO:0005488 binding; GO:0036094 small molecule binding;				IPR020858; IPR014760;	Serum albumin-like; Serum albumin, N-terminal;
A0A0G2JS06	Immunoglobulin lambda variable 5-39 OS=Homo sapiens OX=9606 GN=IGLV5-39 PE=3 SV=1	0.527	Down	0.00084473	IGLV5-39	13.394	1.267	1.323	1.371	0.618	0.687	0.782	extracellular	GO:0002376 immune system process; GO:0006955 immune response; GO:0050896 response to stimulus; GO:0002377 immunoglobulin production; GO:0002440 production of molecular mediator of immune response; GO:0002250 adaptive immune response;	GO:0016020 membrane; GO:0005615 extracellular space; GO:0044421 extracellular region part; GO:0044464 cell part; GO:0071944 cell periphery; GO:0005623 cell; GO:0005576 extracellular region; GO:0005886 plasma membrane;	GO:0005515 protein binding; GO:0003823 antigen binding; GO:0005488 binding;	K06553	VPREB, CD179a; pre-B lymphocyte gene		IPR007110; IPR013783; IPR013106; IPR003599;	Immunoglobulin-like domain; Immunoglobulin-like fold; Immunoglobulin V-set domain; Immunoglobulin subtype;
P14625	Endoplasmin OS=Homo sapiens OX=9606 GN=HSP90B1 PE=1 SV=1	0.811	Down	0.005141	HSP90B1	92.468	0.758	0.755	0.692	0.606	0.613	0.569	endoplasmic reticulum	GO:0044700 single organism signaling; GO:0044085 cellular component biogenesis; GO:0065008 regulation of biological quality; GO:0010941 regulation of cell death; GO:0046683 response to organophosphorus; GO:0036503 ERAD pathway; GO:0031347 regulation of defense response; GO:0044237 cellular metabolic process; GO:0015031 protein transport; GO:0030036 actin cytoskeleton organization; GO:0008152 meta…	GO:0016020 membrane; GO:0042175 nuclear outer membrane-endoplasmic reticulum membrane network; GO:0044421 extracellular region part; GO:0005783 endoplasmic reticulum; GO:0031410 cytoplasmic vesicle; GO:0071944 cell periphery; GO:0030054 cell junction; GO:0031982 vesicle; GO:0005737 cytoplasm; GO:0044433 cytoplasmic vesicle part; GO:0032991 macromolecular complex; GO:0044424 intracellular part; GO…	GO:1901265 nucleoside phosphate binding; GO:0019903 protein phosphatase binding; GO:0005102 receptor binding; GO:0005515 protein binding; GO:1901363 heterocyclic compound binding; GO:0097159 organic cyclic compound binding; GO:0032553 ribonucleotide binding; GO:0005488 binding; GO:0032550 purine ribonucleoside binding; GO:0043169 cation binding; GO:0043168 anion binding; GO:0032559 adenyl ribonuc…	K09487	HSP90B, TRA1; heat shock protein 90kDa beta	hsa04141 Protein processing in endoplasmic reticulum - Homo sapiens (human); hsa04151 PI3K-Akt signaling pathway - Homo sapiens (human); hsa04657 IL-17 signaling pathway - Homo sapiens (human); hsa04915 Estrogen signaling pathway - Homo sapiens (human); hsa04918 Thyroid hormone synthesis - Homo sapiens (human); hsa05200 Pathways in cancer - Homo sapiens (human); hsa05215 Prostate cancer - Homo sa…	IPR020568; IPR020575; IPR003594;	Ribosomal protein S5 domain 2-type fold; Heat shock protein Hsp90, N-terminal; Histidine kinase-like ATPase, C-terminal domain;
P22087	rRNA 2'-O-methyltransferase fibrillarin OS=Homo sapiens OX=9606 GN=FBL PE=1 SV=2	0.749	Down	0.048763	FBL	33.784	1.42		1.604	1.104		1.161	nucleus	GO:0044085 cellular component biogenesis; GO:0001649 osteoblast differentiation; GO:0022613 ribonucleoprotein complex biogenesis; GO:0048869 cellular developmental process; GO:0044699 single-organism process; GO:0018364 peptidyl-glutamine methylation; GO:0009451 RNA modification; GO:0044237 cellular metabolic process; GO:0032259 methylation; GO:1990258 histone glutamine methylation; GO:0043628 nc…	GO:0016020 membrane; GO:0044421 extracellular region part; GO:0031982 vesicle; GO:0032991 macromolecular complex; GO:0044424 intracellular part; GO:0016604 nuclear body; GO:0005623 cell; GO:0015030 Cajal body; GO:0044422 organelle part; GO:0030684 preribosome; GO:0043228 non-membrane-bounded organelle; GO:0070062 extracellular exosome; GO:0031974 membrane-enclosed lumen; GO:0005654 nucleoplasm; G…	GO:1990259 histone-glutamine methyltransferase activity; GO:0003723 RNA binding; GO:0008757 S-adenosylmethionine-dependent methyltransferase activity; GO:0001099 basal RNA polymerase II transcription machinery binding; GO:0008168 methyltransferase activity; GO:0051117 ATPase binding; GO:0016741 transferase activity, transferring one-carbon groups; GO:0005515 protein binding; GO:0036009 protein-gl…	K14563	NOP1, FBL; rRNA 2'-O-methyltransferase fibrillarin [EC:2.1.1.-]	hsa03008 Ribosome biogenesis in eukaryotes - Homo sapiens (human);	IPR029063;	S-adenosyl-L-methionine-dependent methyltransferase;
P51884	Lumican OS=Homo sapiens OX=9606 GN=LUM PE=1 SV=2	0.593	Down	1.1076e-06	LUM	38.429	1.528	1.523	1.47	0.899	0.894	0.888	extracellular	GO:0030199 collagen fibril organization; GO:0007601 visual perception; GO:0051216 cartilage development; GO:0006024 glycosaminoglycan biosynthetic process; GO:0006026 aminoglycan catabolic process; GO:0009891 positive regulation of biosynthetic process; GO:0044699 single-organism process; GO:0009058 biosynthetic process; GO:0042340 keratan sulfate catabolic process; GO:0044237 cellular metabolic …	GO:0098643 banded collagen fibril; GO:0005615 extracellular space; GO:0044421 extracellular region part; GO:0031982 vesicle; GO:0005737 cytoplasm; GO:0032991 macromolecular complex; GO:0005583 fibrillar collagen trimer; GO:0099512 supramolecular fiber; GO:0044424 intracellular part; GO:0099080 supramolecular complex; GO:0005623 cell; GO:0044420 extracellular matrix component; GO:0005581 collagen …	GO:0005201 extracellular matrix structural constituent; GO:0005488 binding; GO:0044877 macromolecular complex binding; GO:0005515 protein binding; GO:0005518 collagen binding; GO:0005198 structural molecule activity; GO:0032403 protein complex binding;	K08122	LUM; lumican	hsa05205 Proteoglycans in cancer - Homo sapiens (human);	IPR000372; IPR032675;	Leucine-rich repeat N-terminal domain; Leucine-rich repeat domain, L domain-like;
Q9H4B7	Tubulin beta-1 chain OS=Homo sapiens OX=9606 GN=TUBB1 PE=1 SV=1	0.619	Down	0.0023155	TUBB1	50.326	1.245	1.131	1.138	0.813	0.704	0.657	cytoplasm	GO:0044085 cellular component biogenesis; GO:0016043 cellular component organization; GO:0044763 single-organism cellular process; GO:0044699 single-organism process; GO:0007051 spindle organization; GO:0007017 microtubule-based process; GO:0000226 microtubule cytoskeleton organization; GO:0051225 spindle assembly; GO:0070925 organelle assembly; GO:0022607 cellular component assembly; GO:0006996 …	GO:0043229 intracellular organelle; GO:0099513 polymeric cytoskeletal fiber; GO:0044421 extracellular region part; GO:0005874 microtubule; GO:0043232 intracellular non-membrane-bounded organelle; GO:0044430 cytoskeletal part; GO:0005737 cytoplasm; GO:0044446 intracellular organelle part; GO:0031982 vesicle; GO:0099512 supramolecular fiber; GO:0044424 intracellular part; GO:0099080 supramolecular …	GO:1901265 nucleoside phosphate binding; GO:0001882 nucleoside binding; GO:0043167 ion binding; GO:0016817 hydrolase activity, acting on acid anhydrides; GO:0016787 hydrolase activity; GO:0000166 nucleotide binding; GO:0017111 nucleoside-triphosphatase activity; GO:1901363 heterocyclic compound binding; GO:0097159 organic cyclic compound binding; GO:0032549 ribonucleoside binding; GO:0097367 carb…	K07375	TUBB; tubulin beta	hsa04145 Phagosome - Homo sapiens (human); hsa04540 Gap junction - Homo sapiens (human); hsa05130 Pathogenic Escherichia coli infection - Homo sapiens (human);	IPR003008; IPR023123; IPR008280; IPR018316;	Tubulin/FtsZ, GTPase domain; Tubulin, C-terminal; Tubulin/FtsZ, C-terminal; Tubulin/FtsZ, 2-layer sandwich domain;
O94769	Extracellular matrix protein 2 OS=Homo sapiens OX=9606 GN=ECM2 PE=2 SV=1	0.736	Down	0.0028595	ECM2	79.788	0.967	0.919	0.913	0.645	0.746	0.67	extracellular	GO:0016043 cellular component organization; GO:0045785 positive regulation of cell adhesion; GO:0044763 single-organism cellular process; GO:0044699 single-organism process; GO:0048518 positive regulation of biological process; GO:0010811 positive regulation of cell-substrate adhesion; GO:0030155 regulation of cell adhesion; GO:0022610 biological adhesion; GO:0050789 regulation of biological proc…	GO:0031012 extracellular matrix; GO:0005615 extracellular space; GO:0044421 extracellular region part; GO:0005614 interstitial matrix; GO:0005576 extracellular region; GO:0005578 proteinaceous extracellular matrix;	GO:0005102 receptor binding; GO:0043167 ion binding; GO:0044877 macromolecular complex binding; GO:0005515 protein binding; GO:0005178 integrin binding; GO:0008201 heparin binding; GO:1901681 sulfur compound binding; GO:0070052 collagen V binding; GO:0050839 cell adhesion molecule binding; GO:0097367 carbohydrate derivative binding; GO:0005488 binding; GO:0005518 collagen binding; GO:0043168 anio…	K08119	ECM2; extracellular matrix protein 2		IPR001007; IPR032675;	VWFC domain; Leucine-rich repeat domain, L domain-like;
P01709	Immunoglobulin lambda variable 2-8 OS=Homo sapiens OX=9606 GN=IGLV2-8 PE=1 SV=2	1.262	Up	0.00169888	IGLV2-8	12.382		1.023	1.042		1.299	1.306	extracellular	GO:0044700 single organism signaling; GO:0016064 immunoglobulin mediated immune response; GO:0051674 localization of cell; GO:0007166 cell surface receptor signaling pathway; GO:0038094 Fc-gamma receptor signaling pathway; GO:0044699 single-organism process; GO:0006909 phagocytosis; GO:0051234 establishment of localization; GO:0006956 complement activation; GO:0007165 signal transduction; GO:0008…	GO:0016020 membrane; GO:0005623 cell; GO:0044464 cell part; GO:0071944 cell periphery; GO:0005576 extracellular region; GO:0005886 plasma membrane;	GO:0004252 serine-type endopeptidase activity; GO:0004175 endopeptidase activity; GO:0008233 peptidase activity; GO:0003824 catalytic activity; GO:0017171 serine hydrolase activity; GO:0005488 binding; GO:0008236 serine-type peptidase activity; GO:0070011 peptidase activity, acting on L-amino acid peptides; GO:0016787 hydrolase activity; GO:0005515 protein binding; GO:0003823 antigen binding;				IPR007110; IPR013783; IPR013106; IPR003599;	Immunoglobulin-like domain; Immunoglobulin-like fold; Immunoglobulin V-set domain; Immunoglobulin subtype;
P0DJI8	Serum amyloid A-1 protein OS=Homo sapiens OX=9606 GN=SAA1 PE=1 SV=1	0.069	Down	7.746e-05	SAA1	13.532	3.73	2.631	2.645	0.204	0.17	0.249	extracellular	GO:0065008 regulation of biological quality; GO:0007596 blood coagulation; GO:0032270 positive regulation of cellular protein metabolic process; GO:0031347 regulation of defense response; GO:0044237 cellular metabolic process; GO:0048247 lymphocyte chemotaxis; GO:0071900 regulation of protein serine/threonine kinase activity; GO:0009605 response to external stimulus; GO:0032732 positive regulatio…	GO:0005615 extracellular space; GO:0044421 extracellular region part; GO:0005874 microtubule; GO:0031410 cytoplasmic vesicle; GO:0005881 cytoplasmic microtubule; GO:0031982 vesicle; GO:0034358 plasma lipoprotein particle; GO:0005737 cytoplasm; GO:0044433 cytoplasmic vesicle part; GO:0032991 macromolecular complex; GO:0044424 intracellular part; GO:0099512 supramolecular fiber; GO:0005623 cell; GO…	GO:0097367 carbohydrate derivative binding; GO:0005102 receptor binding; GO:0005488 binding; GO:0043167 ion binding; GO:0001664 G-protein coupled receptor binding; GO:0005515 protein binding; GO:0043168 anion binding; GO:0005539 glycosaminoglycan binding; GO:0008201 heparin binding; GO:1901681 sulfur compound binding; GO:0042056 chemoattractant activity;	K17310	SAA; serum amyloid A protein
P08603	Complement factor H OS=Homo sapiens OX=9606 GN=CFH PE=1 SV=4	1.223	Up	0.000122285	CFH	139.09	1.029	1.007	0.985	1.22	1.243	1.233	extracellular	GO:0030449 regulation of complement activation; GO:2000257 regulation of protein activation cascade; GO:0002252 immune effector process; GO:0060255 regulation of macromolecule metabolic process; GO:0002920 regulation of humoral immune response; GO:0002673 regulation of acute inflammatory response; GO:0006959 humoral immune response; GO:0080134 regulation of response to stress; GO:0050896 response…	GO:0070062 extracellular exosome; GO:0043226 organelle; GO:0072562 blood microparticle; GO:0005615 extracellular space; GO:0044421 extracellular region part; GO:0031982 vesicle; GO:1903561 extracellular vesicle; GO:0043227 membrane-bounded organelle; GO:0005576 extracellular region; GO:0043230 extracellular organelle;	GO:0097367 carbohydrate derivative binding; GO:0005488 binding; GO:0043167 ion binding; GO:0043394 proteoglycan binding; GO:0043395 heparan sulfate proteoglycan binding; GO:0043168 anion binding; GO:0005515 protein binding; GO:0008201 heparin binding; GO:0005539 glycosaminoglycan binding; GO:0001948 glycoprotein binding; GO:1901681 sulfur compound binding;	K04004	CFH, HF1; complement factor H	hsa04610 Complement and coagulation cascades - Homo sapiens (human); hsa05150 Staphylococcus aureus infection - Homo sapiens (human);	IPR000436;	Sushi/SCR/CCP domain;
P0DOX4	Immunoglobulin epsilon heavy chain OS=Homo sapiens OX=9606 PE=1 SV=1	0.746	Down	0.00032146	---	60.322	1.31	1.228	1.245	0.933	0.919	0.97	nucleus			GO:0005515 protein binding; GO:0005488 binding;				IPR007110; IPR013783; IPR003599; IPR013106; IPR003597;	Immunoglobulin-like domain; Immunoglobulin-like fold; Immunoglobulin subtype; Immunoglobulin V-set domain; Immunoglobulin C1-set;
P04278	Sex hormone-binding globulin OS=Homo sapiens OX=9606 GN=SHBG PE=1 SV=2	1.316	Up	0.043862	SHBG	43.779		1.334	1.309		1.638	1.841	extracellular		GO:0070062 extracellular exosome; GO:0043226 organelle; GO:0044421 extracellular region part; GO:0031982 vesicle; GO:1903561 extracellular vesicle; GO:0043227 membrane-bounded organelle; GO:0005576 extracellular region; GO:0043230 extracellular organelle;	GO:0097159 organic cyclic compound binding; GO:0008289 lipid binding; GO:0005497 androgen binding; GO:0042562 hormone binding; GO:0005496 steroid binding; GO:0005488 binding;				IPR013320; IPR001791;	Concanavalin A-like lectin/glucanase domain; Laminin G domain;
Q9UGM3	Deleted in malignant brain tumors 1 protein OS=Homo sapiens OX=9606 GN=DMBT1 PE=1 SV=2	0.49	Down	0.044781	DMBT1	260.73	1.402	1.661		0.849	0.651		extracellular	GO:0044700 single organism signaling; GO:0048869 cellular developmental process; GO:0098542 defense response to other organism; GO:0044699 single-organism process; GO:0044764 multi-organism cellular process; GO:0031347 regulation of defense response; GO:0043152 induction of bacterial agglutination; GO:0044237 cellular metabolic process; GO:0015031 protein transport; GO:0051234 establishment of lo…	GO:0016020 membrane; GO:0005615 extracellular space; GO:0044421 extracellular region part; GO:0031090 organelle membrane; GO:0031410 cytoplasmic vesicle; GO:0019898 extrinsic component of membrane; GO:0042588 zymogen granule; GO:0031982 vesicle; GO:0005737 cytoplasm; GO:0044433 cytoplasmic vesicle part; GO:0044424 intracellular part; GO:0005623 cell; GO:0044422 organelle part; GO:0070062 extracel…	GO:0038023 signaling receptor activity; GO:0060089 molecular transducer activity; GO:0004872 receptor activity; GO:0035375 zymogen binding; GO:0005488 binding; GO:0038024 cargo receptor activity; GO:0005515 protein binding; GO:0005044 scavenger receptor activity; GO:0038187 pattern recognition receptor activity; GO:0004871 signal transducer activity; GO:0048306 calcium-dependent protein binding; …	K13912	DMBT1; deleted in malignant brain tumors 1 protein	hsa04970 Salivary secretion - Homo sapiens (human);	IPR000859; IPR017448; IPR001190; IPR001507;	CUB domain; SRCR-like domain; SRCR domain; Zona pellucida domain;
O00391	Sulfhydryl oxidase 1 OS=Homo sapiens OX=9606 GN=QSOX1 PE=1 SV=3	0.523	Down	0.0089367	QSOX1	82.577		1.345	1.209		0.689	0.648	Golgi apparatus	GO:0050794 regulation of cellular process; GO:0065008 regulation of biological quality; GO:0045321 leukocyte activation; GO:0002283 neutrophil activation involved in immune response; GO:0002252 immune effector process; GO:0045454 cell redox homeostasis; GO:0002576 platelet degranulation; GO:0044699 single-organism process; GO:0048519 negative regulation of biological process; GO:0031324 negative …	GO:0034774 secretory granule lumen; GO:0016020 membrane; GO:1904724 tertiary granule lumen; GO:0005615 extracellular space; GO:0044421 extracellular region part; GO:0031090 organelle membrane; GO:0031410 cytoplasmic vesicle; GO:0005737 cytoplasm; GO:0031982 vesicle; GO:0044433 cytoplasmic vesicle part; GO:0031224 intrinsic component of membrane; GO:0044424 intracellular part; GO:0030173 integral …	GO:0016864 intramolecular oxidoreductase activity, transposing S-S bonds; GO:0016853 isomerase activity; GO:0003824 catalytic activity; GO:0016972 thiol oxidase activity; GO:0016670 oxidoreductase activity, acting on a sulfur group of donors, oxygen as acceptor; GO:0016667 oxidoreductase activity, acting on a sulfur group of donors; GO:0016860 intramolecular oxidoreductase activity; GO:0003756 pr…	K10758	QSOX; thiol oxidase [EC:1.8.3.2]		IPR017905; IPR013766; IPR012336;	ERV/ALR sulfhydryl oxidase domain; Thioredoxin domain; Thioredoxin-like fold;
P0C0L4	Complement C4-A OS=Homo sapiens OX=9606 GN=C4A PE=1 SV=2	2.1	Up	0.00035894	C4A	192.78	0.513	0.476	0.459	0.94	0.97	1.131	extracellular	GO:0060627 regulation of vesicle-mediated transport; GO:2000425 regulation of apoptotic cell clearance; GO:0016064 immunoglobulin mediated immune response; GO:0031347 regulation of defense response; GO:0051130 positive regulation of cellular component organization; GO:0006956 complement activation; GO:0010466 negative regulation of peptidase activity; GO:0008152 metabolic process; GO:0032879 regu…	GO:0016020 membrane; GO:0030425 dendrite; GO:0005615 extracellular space; GO:0044421 extracellular region part; GO:0042995 cell projection; GO:0071944 cell periphery; GO:0030054 cell junction; GO:0031982 vesicle; GO:0043025 neuronal cell body; GO:0005623 cell; GO:0005576 extracellular region; GO:0005886 plasma membrane; GO:0045202 synapse; GO:0030424 axon; GO:0070062 extracellular exosome; GO:004…	GO:0008233 peptidase activity; GO:0001849 complement component C1q binding; GO:0001846 opsonin binding; GO:0008236 serine-type peptidase activity; GO:0061134 peptidase regulator activity; GO:0016787 hydrolase activity; GO:0005515 protein binding; GO:0098772 molecular function regulator; GO:0004857 enzyme inhibitor activity; GO:0004866 endopeptidase inhibitor activity; GO:0004175 endopeptidase act…	K03989	C4; complement component 4	hsa04610 Complement and coagulation cascades - Homo sapiens (human); hsa05133 Pertussis - Homo sapiens (human); hsa05150 Staphylococcus aureus infection - Homo sapiens (human); hsa05322 Systemic lupus erythematosus - Homo sapiens (human);	IPR008993; IPR001599; IPR011626; IPR000020; IPR002890; IPR011625; IPR009048; IPR001134; IPR001840; IPR008930; IPR018933; IPR019565; IPR018081;	Tissue inhibitor of metalloproteinases-like, OB-fold; Alpha-2-macroglobulin; Alpha-macroglobulin complement component; Anaphylatoxin/fibulin; Alpha-2-macroglobulin, N-terminal; Alpha-2-macroglobulin, N-terminal 2; Alpha-macroglobulin, receptor-binding; Netrin domain; Anaphylatoxin, complement system domain; Terpenoid cyclases/protein prenyltransferase alpha-alpha toroid; Netrin module, non-TIMP t…
A0A075B6K4	Immunoglobulin lambda variable 3-10 OS=Homo sapiens OX=9606 GN=IGLV3-10 PE=3 SV=2	1.438	Up	0.038679	IGLV3-10	12.441	0.986	1.162	0.9	1.456	1.462	1.466	extracellular	GO:0002376 immune system process; GO:0006955 immune response; GO:0050896 response to stimulus; GO:0002377 immunoglobulin production; GO:0002440 production of molecular mediator of immune response; GO:0002250 adaptive immune response;	GO:0016020 membrane; GO:0005615 extracellular space; GO:0044421 extracellular region part; GO:0044464 cell part; GO:0071944 cell periphery; GO:0005623 cell; GO:0005576 extracellular region; GO:0005886 plasma membrane;	GO:0005515 protein binding; GO:0003823 antigen binding; GO:0005488 binding;				IPR007110; IPR013783; IPR003599; IPR013106;	Immunoglobulin-like domain; Immunoglobulin-like fold; Immunoglobulin subtype; Immunoglobulin V-set domain;
Q8N0Z3	Spindle and centriole-associated protein 1 OS=Homo sapiens OX=9606 GN=SPICE1 PE=1 SV=1	0.28	Down	2.0853e-05	SPICE1	96.263	2.035	1.853	2.009	0.504	0.594	0.551	nucleus	GO:0050794 regulation of cellular process; GO:0051640 organelle localization; GO:0044085 cellular component biogenesis; GO:0016043 cellular component organization; GO:0007067 mitotic nuclear division; GO:0048285 organelle fission; GO:0007051 spindle organization; GO:0044699 single-organism process; GO:0044087 regulation of cellular component biogenesis; GO:0051310 metaphase plate congression; GO:…	GO:0043229 intracellular organelle; GO:0044450 microtubule organizing center part; GO:0043232 intracellular non-membrane-bounded organelle; GO:0044430 cytoskeletal part; GO:0005737 cytoplasm; GO:0044446 intracellular organelle part; GO:0044424 intracellular part; GO:0005623 cell; GO:0005819 spindle; GO:0044422 organelle part; GO:0043228 non-membrane-bounded organelle; GO:0043226 organelle; GO:000…	GO:0005515 protein binding; GO:0005488 binding;	K16490	SPICE1; spindle and centriole-associated protein 1
P04003	C4b-binding protein alpha chain OS=Homo sapiens OX=9606 GN=C4BPA PE=1 SV=2	1.446	Up	1.69667e-05	C4BPA	67.033	0.707	0.738	0.724	1.061	1.04	1.036	plasma membrane	GO:0060627 regulation of vesicle-mediated transport; GO:0030450 regulation of complement activation, classical pathway; GO:0016064 immunoglobulin mediated immune response; GO:0002698 negative regulation of immune effector process; GO:1903318 negative regulation of protein maturation; GO:0045916 negative regulation of complement activation; GO:0031347 regulation of defense response; GO:0006956 com…	GO:0016020 membrane; GO:0044217 other organism part; GO:0072562 blood microparticle; GO:0044421 extracellular region part; GO:0005615 extracellular space; GO:0044464 cell part; GO:0071944 cell periphery; GO:0044216 other organism cell; GO:0044215 other organism; GO:0005623 cell; GO:0005576 extracellular region; GO:0005886 plasma membrane;	GO:0097159 organic cyclic compound binding; GO:1901363 heterocyclic compound binding; GO:0003723 RNA binding; GO:0005515 protein binding; GO:0005488 binding; GO:0003676 nucleic acid binding;	K04002	C4BPA; complement component 4 binding protein, alpha	hsa04610 Complement and coagulation cascades - Homo sapiens (human); hsa05133 Pertussis - Homo sapiens (human);	IPR000436;	Sushi/SCR/CCP domain;
A0A0B4J1U7	Immunoglobulin heavy variable 6-1 OS=Homo sapiens OX=9606 GN=IGHV6-1 PE=3 SV=1	1.681	Up	0.00144048	IGHV6-1	13.481	0.785	0.879	0.931	1.492	1.537	1.332	extracellular	GO:0044700 single organism signaling; GO:0002694 regulation of leukocyte activation; GO:0016064 immunoglobulin mediated immune response; GO:0007166 cell surface receptor signaling pathway; GO:0098542 defense response to other organism; GO:0044699 single-organism process; GO:0051249 regulation of lymphocyte activation; GO:0009607 response to biotic stimulus; GO:0051234 establishment of localizatio…	GO:0016020 membrane; GO:0044421 extracellular region part; GO:0005615 extracellular space; GO:0009897 external side of plasma membrane; GO:0071944 cell periphery; GO:0042571 immunoglobulin complex, circulating; GO:0019814 immunoglobulin complex; GO:0032991 macromolecular complex; GO:0005623 cell; GO:0005576 extracellular region; GO:0005886 plasma membrane; GO:0072562 blood microparticle; GO:00444…	GO:0034987 immunoglobulin receptor binding; GO:0005515 protein binding; GO:0005102 receptor binding; GO:0003823 antigen binding; GO:0005488 binding;	K06856	IGH; immunoglobulin heavy chain	hsa04020 Calcium signaling pathway - Homo sapiens (human); hsa04064 NF-kappa B signaling pathway - Homo sapiens (human); hsa04072 Phospholipase D signaling pathway - Homo sapiens (human); hsa04145 Phagosome - Homo sapiens (human); hsa04151 PI3K-Akt signaling pathway - Homo sapiens (human); hsa04640 Hematopoietic cell lineage - Homo sapiens (human); hsa04650 Natural killer cell mediated cytotoxici…	IPR007110; IPR013783; IPR013106;	Immunoglobulin-like domain; Immunoglobulin-like fold; Immunoglobulin V-set domain;
A0A0J9YXX1	Immunoglobulin heavy variable 5-10-1 OS=Homo sapiens OX=9606 GN=IGHV5-10-1 PE=3 SV=1	0.678	Down	0.029922	IGHV5-10-1	12.772	1.225	1.14	1.199	0.906	0.886	0.626	extracellular			GO:0005515 protein binding; GO:0005488 binding;				IPR007110; IPR013783; IPR013106;	Immunoglobulin-like domain; Immunoglobulin-like fold; Immunoglobulin V-set domain;
O14791	Apolipoprotein L1 OS=Homo sapiens OX=9606 GN=APOL1 PE=1 SV=5	1.345	Up	0.0030809	APOL1	43.974	0.968	0.915	0.935	1.264	1.259	1.267	endoplasmic reticulum	GO:0098661 inorganic anion transmembrane transport; GO:0065008 regulation of biological quality; GO:0019835 cytolysis; GO:0034220 ion transmembrane transport; GO:1901615 organic hydroxy compound metabolic process; GO:1902652 secondary alcohol metabolic process; GO:0006066 alcohol metabolic process; GO:0044699 single-organism process; GO:0006821 chloride transport; GO:0035821 modification of morph…	GO:0016020 membrane; GO:0072562 blood microparticle; GO:0005615 extracellular space; GO:0044421 extracellular region part; GO:0032994 protein-lipid complex; GO:0044425 membrane part; GO:1990777 lipoprotein particle; GO:0034358 plasma lipoprotein particle; GO:0034385 triglyceride-rich plasma lipoprotein particle; GO:0031224 intrinsic component of membrane; GO:0032991 macromolecular complex; GO:003…	GO:0015075 ion transmembrane transporter activity; GO:0022803 passive transmembrane transporter activity; GO:0005253 anion channel activity; GO:0022892 substrate-specific transporter activity; GO:0005515 protein binding; GO:0005254 chloride channel activity; GO:0015267 channel activity; GO:0015103 inorganic anion transmembrane transporter activity; GO:0022891 substrate-specific transmembrane tran…	K14480	APOL; apolipoprotein L
P0C0L5	Complement C4-B OS=Homo sapiens OX=9606 GN=C4B PE=1 SV=2	3.464	Up	4.0809e-05	C4B	192.75	0.554	0.464	0.456	1.684	1.756	1.666	extracellular	GO:0060627 regulation of vesicle-mediated transport; GO:0009593 detection of chemical stimulus; GO:2000425 regulation of apoptotic cell clearance; GO:0016064 immunoglobulin mediated immune response; GO:0044699 single-organism process; GO:0098581 detection of external biotic stimulus; GO:0031347 regulation of defense response; GO:0009607 response to biotic stimulus; GO:0051234 establishment of loc…	GO:0016020 membrane; GO:0030425 dendrite; GO:0044217 other organism part; GO:0005615 extracellular space; GO:0044421 extracellular region part; GO:0042995 cell projection; GO:0071944 cell periphery; GO:0030054 cell junction; GO:0044216 other organism cell; GO:0031982 vesicle; GO:0005623 cell; GO:0005576 extracellular region; GO:0005886 plasma membrane; GO:0045202 synapse; GO:0030424 axon; GO:0070…	GO:0008233 peptidase activity; GO:0008236 serine-type peptidase activity; GO:0061134 peptidase regulator activity; GO:0016787 hydrolase activity; GO:0005515 protein binding; GO:0004857 enzyme inhibitor activity; GO:0098772 molecular function regulator; GO:0004866 endopeptidase inhibitor activity; GO:0004175 endopeptidase activity; GO:0004252 serine-type endopeptidase activity; GO:0030234 enzyme r…	K03989	C4; complement component 4	hsa04610 Complement and coagulation cascades - Homo sapiens (human); hsa05133 Pertussis - Homo sapiens (human); hsa05150 Staphylococcus aureus infection - Homo sapiens (human); hsa05322 Systemic lupus erythematosus - Homo sapiens (human);	IPR008993; IPR001599; IPR011626; IPR000020; IPR002890; IPR011625; IPR009048; IPR001134; IPR001840; IPR018933; IPR008930; IPR019565; IPR018081;	Tissue inhibitor of metalloproteinases-like, OB-fold; Alpha-2-macroglobulin; Alpha-macroglobulin complement component; Anaphylatoxin/fibulin; Alpha-2-macroglobulin, N-terminal; Alpha-2-macroglobulin, N-terminal 2; Alpha-macroglobulin, receptor-binding; Netrin domain; Anaphylatoxin, complement system domain; Netrin module, non-TIMP type; Terpenoid cyclases/protein prenyltransferase alpha-alpha tor…
P07359	Platelet glycoprotein Ib alpha chain OS=Homo sapiens OX=9606 GN=GP1BA PE=1 SV=2	0.568	Down	7.7393e-05	GP1BA	71.539	1.157	1.054	1.113	0.631	0.606	0.65	extracellular	GO:0044700 single organism signaling; GO:0007596 blood coagulation; GO:0065008 regulation of biological quality; GO:0009968 negative regulation of signal transduction; GO:0007166 cell surface receptor signaling pathway; GO:0023051 regulation of signaling; GO:0048869 cellular developmental process; GO:0032989 cellular component morphogenesis; GO:0051241 negative regulation of multicellular organis…	GO:0016020 membrane; GO:0044421 extracellular region part; GO:0031226 intrinsic component of plasma membrane; GO:0009897 external side of plasma membrane; GO:0071944 cell periphery; GO:0031225 anchored component of membrane; GO:0031982 vesicle; GO:0005737 cytoplasm; GO:0031224 intrinsic component of membrane; GO:0044424 intracellular part; GO:0005887 integral component of plasma membrane; GO:0005…	GO:0038023 signaling receptor activity; GO:0004930 G-protein coupled receptor activity; GO:0005515 protein binding; GO:0004860 protein kinase inhibitor activity; GO:0015057 thrombin-activated receptor activity; GO:0019207 kinase regulator activity; GO:0019887 protein kinase regulator activity; GO:0001653 peptide receptor activity; GO:0004888 transmembrane signaling receptor activity; GO:0098772 m…	K06261	GP1BA, CD42b; platelet glycoprotein Ib alpha chain	hsa04512 ECM-receptor interaction - Homo sapiens (human); hsa04611 Platelet activation - Homo sapiens (human); hsa04640 Hematopoietic cell lineage - Homo sapiens (human);	IPR000483; IPR000372; IPR032675;	Cysteine-rich flanking region, C-terminal; Leucine-rich repeat N-terminal domain; Leucine-rich repeat domain, L domain-like;
P23470	Receptor-type tyrosine-protein phosphatase gamma OS=Homo sapiens OX=9606 GN=PTPRG PE=1 SV=4	0.624	Down	0.0011202	PTPRG	162		1.15	1.122		0.702	0.716	plasma membrane	GO:0044700 single organism signaling; GO:0051093 negative regulation of developmental process; GO:0007166 cell surface receptor signaling pathway; GO:0007420 brain development; GO:0010633 negative regulation of epithelial cell migration; GO:0048869 cellular developmental process; GO:0051129 negative regulation of cellular component organization; GO:0022008 neurogenesis; GO:0044699 single-organism…	GO:0016020 membrane; GO:0031226 intrinsic component of plasma membrane; GO:0005615 extracellular space; GO:0044421 extracellular region part; GO:0071944 cell periphery; GO:0031982 vesicle; GO:0031224 intrinsic component of membrane; GO:0005887 integral component of plasma membrane; GO:0005623 cell; GO:0016021 integral component of membrane; GO:0005576 extracellular region; GO:0005886 plasma membr…	GO:0038023 signaling receptor activity; GO:0016791 phosphatase activity; GO:0016787 hydrolase activity; GO:0005515 protein binding; GO:0004721 phosphoprotein phosphatase activity; GO:0004888 transmembrane signaling receptor activity; GO:0004871 signal transducer activity; GO:0060089 molecular transducer activity; GO:0042802 identical protein binding; GO:0004872 receptor activity; GO:0005001 trans…	K16667	PTPRG; receptor-type tyrosine-protein phosphatase gamma [EC:3.1.3.48]		IPR029021; IPR000387; IPR003595; IPR013783; IPR000242; IPR003961; IPR001148;	Protein-tyrosine phosphatase-like; Tyrosine specific protein phosphatases domain; Protein-tyrosine phosphatase, catalytic; Immunoglobulin-like fold; PTP type protein phosphatase; Fibronectin type III; Alpha carbonic anhydrase;
P02750	Leucine-rich alpha-2-glycoprotein OS=Homo sapiens OX=9606 GN=LRG1 PE=1 SV=2	0.553	Down	2.1681e-06	LRG1	38.177	1.921	1.843	1.937	1.061	1.034	1.056	extracellular	GO:0045321 leukocyte activation; GO:0023051 regulation of signaling; GO:0048869 cellular developmental process; GO:0044699 single-organism process; GO:0051234 establishment of localization; GO:0090100 positive regulation of transmembrane receptor protein serine/threonine kinase signaling pathway; GO:0010646 regulation of cell communication; GO:0051240 positive regulation of multicellular organism…	GO:0034774 secretory granule lumen; GO:0016020 membrane; GO:1904724 tertiary granule lumen; GO:0005615 extracellular space; GO:0044421 extracellular region part; GO:0031410 cytoplasmic vesicle; GO:0005737 cytoplasm; GO:0031982 vesicle; GO:0044433 cytoplasmic vesicle part; GO:0044424 intracellular part; GO:0005623 cell; GO:1904813 ficolin-1-rich granule lumen; GO:0044422 organelle part; GO:0070062…	GO:0005515 protein binding; GO:0005102 receptor binding; GO:0005160 transforming growth factor beta receptor binding; GO:0005488 binding; GO:0005126 cytokine receptor binding;				IPR000483; IPR032675;	Cysteine-rich flanking region, C-terminal; Leucine-rich repeat domain, L domain-like;
A0A0A0MS14	Immunoglobulin heavy variable 1-45 OS=Homo sapiens OX=9606 GN=IGHV1-45 PE=3 SV=1	2.923	Up	0.0171183	IGHV1-45	13.508		0.796	0.795		2.392	2.258	extracellular	GO:0044700 single organism signaling; GO:0002694 regulation of leukocyte activation; GO:0016064 immunoglobulin mediated immune response; GO:0007166 cell surface receptor signaling pathway; GO:0098542 defense response to other organism; GO:0044699 single-organism process; GO:0051249 regulation of lymphocyte activation; GO:0009607 response to biotic stimulus; GO:0051234 establishment of localizatio…	GO:0016020 membrane; GO:0044421 extracellular region part; GO:0005615 extracellular space; GO:0009897 external side of plasma membrane; GO:0071944 cell periphery; GO:0042571 immunoglobulin complex, circulating; GO:0019814 immunoglobulin complex; GO:0032991 macromolecular complex; GO:0005623 cell; GO:0005576 extracellular region; GO:0005886 plasma membrane; GO:0072562 blood microparticle; GO:00444…	GO:0034987 immunoglobulin receptor binding; GO:0005515 protein binding; GO:0005102 receptor binding; GO:0003823 antigen binding; GO:0005488 binding;				IPR007110; IPR013783; IPR013106;	Immunoglobulin-like domain; Immunoglobulin-like fold; Immunoglobulin V-set domain;
Q08380	Galectin-3-binding protein OS=Homo sapiens OX=9606 GN=LGALS3BP PE=1 SV=1	0.55	Down	0.0021212	LGALS3BP	65.33	1.194	1.103	1.097	0.618	0.624	0.624	extracellular	GO:0050794 regulation of cellular process; GO:0044700 single organism signaling; GO:0051716 cellular response to stimulus; GO:0006950 response to stress; GO:0016192 vesicle-mediated transport; GO:0044763 single-organism cellular process; GO:0002576 platelet degranulation; GO:0044699 single-organism process; GO:0006897 endocytosis; GO:0023052 signaling; GO:0050896 response to stimulus; GO:0051234 …	GO:0034774 secretory granule lumen; GO:0016020 membrane; GO:0042827 platelet dense granule; GO:0005615 extracellular space; GO:0044421 extracellular region part; GO:0031410 cytoplasmic vesicle; GO:0005737 cytoplasm; GO:0031982 vesicle; GO:0044433 cytoplasmic vesicle part; GO:0044424 intracellular part; GO:0005623 cell; GO:0044422 organelle part; GO:0031974 membrane-enclosed lumen; GO:0070062 extr…	GO:0038024 cargo receptor activity; GO:0005044 scavenger receptor activity; GO:0060089 molecular transducer activity; GO:0005515 protein binding; GO:0004872 receptor activity; GO:0005488 binding;	K17300	LGALS3BP; galectin-3-binding protein		IPR001190; IPR017448; IPR011705; IPR000210;	SRCR domain; SRCR-like domain; BTB/Kelch-associated; BTB/POZ domain;
P02652	Apolipoprotein A-II OS=Homo sapiens OX=9606 GN=APOA2 PE=1 SV=1	0.623	Down	0.00041621	APOA2	11.175	1.514	1.516	1.483	1.004	0.865	0.944	extracellular	GO:0044085 cellular component biogenesis; GO:0032371 regulation of sterol transport; GO:0006066 alcohol metabolic process; GO:0009891 positive regulation of biosynthetic process; GO:0002698 negative regulation of immune effector process; GO:0044255 cellular lipid metabolic process; GO:0044237 cellular metabolic process; GO:0008610 lipid biosynthetic process; GO:0046461 neutral lipid catabolic pro…	GO:0005783 endoplasmic reticulum; GO:0044421 extracellular region part; GO:0005615 extracellular space; GO:0031410 cytoplasmic vesicle; GO:0005737 cytoplasm; GO:0031982 vesicle; GO:0034358 plasma lipoprotein particle; GO:0034385 triglyceride-rich plasma lipoprotein particle; GO:0032991 macromolecular complex; GO:0044424 intracellular part; GO:0005623 cell; GO:0034361 very-low-density lipoprotein …	GO:0032934 sterol binding; GO:0070405 ammonium ion binding; GO:0005102 receptor binding; GO:0046983 protein dimerization activity; GO:0005319 lipid transporter activity; GO:0022892 substrate-specific transporter activity; GO:0005515 protein binding; GO:0004857 enzyme inhibitor activity; GO:0098772 molecular function regulator; GO:0005496 steroid binding; GO:0097159 organic cyclic compound binding…	K08758	APOA2; apolipoprotein A-II	hsa03320 PPAR signaling pathway - Homo sapiens (human); hsa04979 Cholesterol metabolism - Homo sapiens (human);
Q9UK55	Protein Z-dependent protease inhibitor OS=Homo sapiens OX=9606 GN=SERPINA10 PE=1 SV=1	0.753	Down	0.00198363	SERPINA10	50.706	0.885	0.818	0.857	0.65	0.604	0.674	extracellular	GO:0050794 regulation of cellular process; GO:0044707 single-multicellular organism process; GO:0007596 blood coagulation; GO:0065008 regulation of biological quality; GO:0010951 negative regulation of endopeptidase activity; GO:0060255 regulation of macromolecule metabolic process; GO:0044699 single-organism process; GO:0048523 negative regulation of cellular process; GO:0048519 negative regulat…	GO:0070062 extracellular exosome; GO:0043226 organelle; GO:0005615 extracellular space; GO:0044421 extracellular region part; GO:0031982 vesicle; GO:1903561 extracellular vesicle; GO:0043227 membrane-bounded organelle; GO:0005576 extracellular region; GO:0043230 extracellular organelle;	GO:0043167 ion binding; GO:0061134 peptidase regulator activity; GO:0008201 heparin binding; GO:0098772 molecular function regulator; GO:0004857 enzyme inhibitor activity; GO:1901681 sulfur compound binding; GO:0004866 endopeptidase inhibitor activity; GO:0004867 serine-type endopeptidase inhibitor activity; GO:0097367 carbohydrate derivative binding; GO:0030234 enzyme regulator activity; GO:0005…	K04525	SERPINA; serpin peptidase inhibitor, clade A		IPR023796; IPR033835;	Serpin domain; Protein Z-dependent peptidase inhibitor;
O95445	Apolipoprotein M OS=Homo sapiens OX=9606 GN=APOM PE=1 SV=2	0.74	Down	0.00026067	APOM	21.253	1.351	1.35	1.389	1.051	0.971	1.004	extracellular	GO:0034367 macromolecular complex remodeling; GO:0044085 cellular component biogenesis; GO:0065008 regulation of biological quality; GO:0015850 organic hydroxy compound transport; GO:0009746 response to hexose; GO:0033344 cholesterol efflux; GO:0030301 cholesterol transport; GO:0044699 single-organism process; GO:0044255 cellular lipid metabolic process; GO:0034442 regulation of lipoprotein oxida…	GO:0016020 membrane; GO:0031226 intrinsic component of plasma membrane; GO:0005615 extracellular space; GO:0044421 extracellular region part; GO:0071944 cell periphery; GO:0034362 low-density lipoprotein particle; GO:0031982 vesicle; GO:0034358 plasma lipoprotein particle; GO:0034385 triglyceride-rich plasma lipoprotein particle; GO:0031224 intrinsic component of membrane; GO:0032991 macromolecul…	GO:0005488 binding; GO:0005543 phospholipid binding; GO:0043167 ion binding; GO:0016209 antioxidant activity; GO:0005319 lipid transporter activity; GO:0008289 lipid binding; GO:0022892 substrate-specific transporter activity; GO:0043168 anion binding; GO:0005215 transporter activity;				IPR011038;	Calycin-like;
O14786	Neuropilin-1 OS=Homo sapiens OX=9606 GN=NRP1 PE=1 SV=3	0.744	Down	0.0145429	NRP1	103.13	1.054	1.013	0.928	0.679	0.714	0.834	endoplasmic reticulum	GO:0044700 single organism signaling; GO:0060839 endothelial cell fate commitment; GO:0010941 regulation of cell death; GO:0090130 tissue migration; GO:0048008 platelet-derived growth factor receptor signaling pathway; GO:0048732 gland development; GO:0035282 segmentation; GO:0043523 regulation of neuron apoptotic process; GO:0010594 regulation of endothelial cell migration; GO:0048754 branching …	GO:0016020 membrane; GO:0005615 extracellular space; GO:0044421 extracellular region part; GO:0031410 cytoplasmic vesicle; GO:0071944 cell periphery; GO:0030054 cell junction; GO:0005737 cytoplasm; GO:0031982 vesicle; GO:0043025 neuronal cell body; GO:0031224 intrinsic component of membrane; GO:0032991 macromolecular complex; GO:0099512 supramolecular fiber; GO:0030426 growth cone; GO:0044424 int…	GO:0016773 phosphotransferase activity, alcohol group as acceptor; GO:0019838 growth factor binding; GO:0015026 coreceptor activity; GO:0017154 semaphorin receptor activity; GO:0004713 protein tyrosine kinase activity; GO:0005515 protein binding; GO:0004672 protein kinase activity; GO:0004888 transmembrane signaling receptor activity; GO:0008201 heparin binding; GO:0004871 signal transducer activ…	K06724	NRP1, CD304; neuropilin 1	hsa04360 Axon guidance - Homo sapiens (human); hsa05166 Human T-cell leukemia virus 1 infection - Homo sapiens (human);	IPR000421; IPR000859; IPR000998; IPR013320; IPR022579; IPR008979;	Coagulation factor 5/8 C-terminal domain; CUB domain; MAM domain; Concanavalin A-like lectin/glucanase domain; Neuropilin, C-terminal; Galactose-binding domain-like;
P39060	Collagen alpha-1(XVIII) chain OS=Homo sapiens OX=9606 GN=COL18A1 PE=1 SV=5	0.484	Down	0.0060649	COL18A1	178.19	1.181	1.169	1.202	0.518	0.57	0.63	extracellular	GO:0010941 regulation of cell death; GO:0001101 response to acid chemical; GO:0030335 positive regulation of cell migration; GO:2000351 regulation of endothelial cell apoptotic process; GO:0001568 blood vessel development; GO:0007601 visual perception; GO:0040017 positive regulation of locomotion; GO:0048869 cellular developmental process; GO:0044236 multicellular organism metabolic process; GO:0…	GO:0005615 extracellular space; GO:0044421 extracellular region part; GO:0005783 endoplasmic reticulum; GO:0031982 vesicle; GO:0005737 cytoplasm; GO:0032991 macromolecular complex; GO:0044424 intracellular part; GO:0005623 cell; GO:0044420 extracellular matrix component; GO:0005581 collagen trimer; GO:0044422 organelle part; GO:0005604 basement membrane; GO:0070062 extracellular exosome; GO:00319…	GO:0046872 metal ion binding; GO:0043169 cation binding; GO:0005515 protein binding; GO:0042802 identical protein binding; GO:0005198 structural molecule activity; GO:0005488 binding; GO:0043167 ion binding;	K06823	COL18A; collagen, type XVIII, alpha	hsa04974 Protein digestion and absorption - Homo sapiens (human);	IPR020067; IPR016187; IPR010363; IPR010515; IPR001791; IPR013320; IPR016186;	Frizzled domain; C-type lectin fold; Domain of unknown function DUF959, collagen XVIII, N-terminal; Collagenase NC10/endostatin; Laminin G domain; Concanavalin A-like lectin/glucanase domain; C-type lectin-like/link domain;
Q13103	Secreted phosphoprotein 24 OS=Homo sapiens OX=9606 GN=SPP2 PE=1 SV=1	1.278	Up	0.0164646	SPP2	24.337	1.192	1.049	1.074	1.546	1.363	1.326	extracellular	GO:0050794 regulation of cellular process; GO:0044707 single-multicellular organism process; GO:0010951 negative regulation of endopeptidase activity; GO:0060255 regulation of macromolecule metabolic process; GO:0044699 single-organism process; GO:0002576 platelet degranulation; GO:0031324 negative regulation of cellular metabolic process; GO:0048519 negative regulation of biological process; GO:…	GO:0034774 secretory granule lumen; GO:0042827 platelet dense granule; GO:0044421 extracellular region part; GO:0031410 cytoplasmic vesicle; GO:0005737 cytoplasm; GO:0031982 vesicle; GO:0044433 cytoplasmic vesicle part; GO:0044424 intracellular part; GO:0005623 cell; GO:0044422 organelle part; GO:0031974 membrane-enclosed lumen; GO:0070062 extracellular exosome; GO:0031983 vesicle lumen; GO:00700…	GO:0030234 enzyme regulator activity; GO:0030414 peptidase inhibitor activity; GO:0061134 peptidase regulator activity; GO:0061135 endopeptidase regulator activity; GO:0004857 enzyme inhibitor activity; GO:0098772 molecular function regulator; GO:0004866 endopeptidase inhibitor activity;				IPR010892;	Secreted phosphoprotein 24;
Q04917	14-3-3 protein eta OS=Homo sapiens OX=9606 GN=YWHAH PE=1 SV=4	0.202	Down	0.0044356	YWHAH	28.218	2.282	2.34		0.516	0.417		cytoplasm	GO:0044700 single organism signaling; GO:0010941 regulation of cell death; GO:0065008 regulation of biological quality; GO:2000171 negative regulation of dendrite development; GO:0007420 brain development; GO:0009891 positive regulation of biosynthetic process; GO:0010821 regulation of mitochondrion organization; GO:0015031 protein transport; GO:0048857 neural nucleus development; GO:0021762 subs…	GO:0097708 intracellular vesicle; GO:0016020 membrane; GO:0043229 intracellular organelle; GO:0044421 extracellular region part; GO:0031090 organelle membrane; GO:0031410 cytoplasmic vesicle; GO:0071944 cell periphery; GO:0030054 cell junction; GO:0044291 cell-cell contact zone; GO:0031982 vesicle; GO:0044446 intracellular organelle part; GO:0005737 cytoplasm; GO:0044433 cytoplasmic vesicle part;…	GO:0046982 protein heterodimerization activity; GO:0035259 glucocorticoid receptor binding; GO:0005102 receptor binding; GO:0046983 protein dimerization activity; GO:0005515 protein binding; GO:0017080 sodium channel regulator activity; GO:0051427 hormone receptor binding; GO:0098772 molecular function regulator; GO:0005159 insulin-like growth factor receptor binding; GO:0008092 cytoskeletal prot…	K16198	YWHAG_H; 14-3-3 protein gamma/eta	hsa04110 Cell cycle - Homo sapiens (human); hsa04114 Oocyte meiosis - Homo sapiens (human); hsa04151 PI3K-Akt signaling pathway - Homo sapiens (human); hsa04390 Hippo signaling pathway - Homo sapiens (human); hsa05203 Viral carcinogenesis - Homo sapiens (human);	IPR023410;	14-3-3 domain;
P35916	Vascular endothelial growth factor receptor 3 OS=Homo sapiens OX=9606 GN=FLT4 PE=1 SV=3	1.341	Up	0.035402	FLT4	152.76		0.817	0.9		1.117	1.186	plasma membrane	GO:0044700 single organism signaling; GO:0010941 regulation of cell death; GO:0030335 positive regulation of cell migration; GO:0032872 regulation of stress-activated MAPK cascade; GO:0032270 positive regulation of cellular protein metabolic process; GO:0007166 cell surface receptor signaling pathway; GO:0030323 respiratory tube development; GO:0018212 peptidyl-tyrosine modification; GO:0044237 c…	GO:0043229 intracellular organelle; GO:0016020 membrane; GO:0031226 intrinsic component of plasma membrane; GO:0071944 cell periphery; GO:0005737 cytoplasm; GO:0043235 receptor complex; GO:0032991 macromolecular complex; GO:0031224 intrinsic component of membrane; GO:0044424 intracellular part; GO:0005887 integral component of plasma membrane; GO:0005623 cell; GO:0005576 extracellular region; GO:…	GO:1901265 nucleoside phosphate binding; GO:0016773 phosphotransferase activity, alcohol group as acceptor; GO:0019903 protein phosphatase binding; GO:0019838 growth factor binding; GO:0004713 protein tyrosine kinase activity; GO:0005515 protein binding; GO:0004672 protein kinase activity; GO:0004888 transmembrane signaling receptor activity; GO:0004871 signal transducer activity; GO:0004714 tran…	K05097	FLT4, VEGFR3; FMS-like tyrosine kinase 4 [EC:2.7.10.1]	hsa04010 MAPK signaling pathway - Homo sapiens (human); hsa04014 Ras signaling pathway - Homo sapiens (human); hsa04015 Rap1 signaling pathway - Homo sapiens (human); hsa04151 PI3K-Akt signaling pathway - Homo sapiens (human); hsa04510 Focal adhesion - Homo sapiens (human); hsa05200 Pathways in cancer - Homo sapiens (human); hsa05224 Breast cancer - Homo sapiens (human);	IPR003598; IPR007110; IPR013783; IPR000719; IPR003599; IPR001245; IPR020635; IPR013098; IPR011009;	Immunoglobulin subtype 2; Immunoglobulin-like domain; Immunoglobulin-like fold; Protein kinase domain; Immunoglobulin subtype; Serine-threonine/tyrosine-protein kinase catalytic domain; Tyrosine-protein kinase, catalytic domain; Immunoglobulin I-set; Protein kinase-like domain;
Q9HCU0	Endosialin OS=Homo sapiens OX=9606 GN=CD248 PE=1 SV=1	0.792	Down	0.00196191	CD248	80.858	1.093	1.169	1.191	0.886	0.905	0.945	peroxisome	GO:0050794 regulation of cellular process; GO:0044707 single-multicellular organism process; GO:0016477 cell migration; GO:0010941 regulation of cell death; GO:2000351 regulation of endothelial cell apoptotic process; GO:0042127 regulation of cell proliferation; GO:0051674 localization of cell; GO:0043067 regulation of programmed cell death; GO:0043065 positive regulation of apoptotic process; GO…	GO:0016020 membrane; GO:0044421 extracellular region part; GO:0005737 cytoplasm; GO:0031982 vesicle; GO:0031224 intrinsic component of membrane; GO:0044424 intracellular part; GO:0005623 cell; GO:0016021 integral component of membrane; GO:0005576 extracellular region; GO:0043226 organelle; GO:0070062 extracellular exosome; GO:0031012 extracellular matrix; GO:0044425 membrane part; GO:0005622 intr…	GO:0005488 binding; GO:0043167 ion binding; GO:0030246 carbohydrate binding; GO:0046872 metal ion binding; GO:0043169 cation binding; GO:0005515 protein binding; GO:0005509 calcium ion binding; GO:0050840 extracellular matrix binding;	K06706	CD248, CD164L1; CD248 antigen, endosialin		IPR001304; IPR016187; IPR001881; IPR000742; IPR009030; IPR016186;	C-type lectin-like; C-type lectin fold; EGF-like calcium-binding domain; EGF-like domain; Growth factor receptor cysteine-rich domain; C-type lectin-like/link domain;
Q13201	Multimerin-1 OS=Homo sapiens OX=9606 GN=MMRN1 PE=1 SV=3	1.325	Up	0.000117361	MMRN1	138.11	0.66	0.662	0.633	0.848	0.883	0.859	mitochondria	GO:0044707 single-multicellular organism process; GO:0007596 blood coagulation; GO:0065008 regulation of biological quality; GO:0050878 regulation of body fluid levels; GO:0006950 response to stress; GO:0016192 vesicle-mediated transport; GO:0044763 single-organism cellular process; GO:0002576 platelet degranulation; GO:0044699 single-organism process; GO:0050896 response to stimulus; GO:0032501 …	GO:0034774 secretory granule lumen; GO:0043229 intracellular organelle; GO:0097708 intracellular vesicle; GO:0044421 extracellular region part; GO:0031410 cytoplasmic vesicle; GO:0031982 vesicle; GO:0005737 cytoplasm; GO:0044446 intracellular organelle part; GO:0044433 cytoplasmic vesicle part; GO:0012505 endomembrane system; GO:0044424 intracellular part; GO:0005623 cell; GO:0005576 extracellula…	GO:0043169 cation binding; GO:0046872 metal ion binding; GO:0005515 protein binding; GO:0005509 calcium ion binding; GO:0005488 binding; GO:0043167 ion binding;				IPR008983; IPR001881; IPR000742; IPR001073; IPR011489;	Tumour necrosis factor-like domain; EGF-like calcium-binding domain; EGF-like domain; C1q domain; EMI domain;
P49747	Cartilage oligomeric matrix protein OS=Homo sapiens OX=9606 GN=COMP PE=1 SV=2	0.424	Down	1.75699e-05	COMP	82.86	1.641	1.597	1.541	0.683	0.638	0.704	extracellular	GO:0050794 regulation of cellular process; GO:0016043 cellular component organization; GO:0044707 single-multicellular organism process; GO:0010941 regulation of cell death; GO:0043069 negative regulation of programmed cell death; GO:0051216 cartilage development; GO:0043067 regulation of programmed cell death; GO:0044699 single-organism process; GO:0098868 bone growth; GO:0048523 negative regula…	GO:0031012 extracellular matrix; GO:0070062 extracellular exosome; GO:0043226 organelle; GO:0005615 extracellular space; GO:0044421 extracellular region part; GO:0031982 vesicle; GO:1903561 extracellular vesicle; GO:0005578 proteinaceous extracellular matrix; GO:0043227 membrane-bounded organelle; GO:0005576 extracellular region; GO:0043230 extracellular organelle;	GO:0044877 macromolecular complex binding; GO:0043167 ion binding; GO:0043394 proteoglycan binding; GO:0043395 heparan sulfate proteoglycan binding; GO:0005515 protein binding; GO:0008201 heparin binding; GO:1901681 sulfur compound binding; GO:0002020 protease binding; GO:0005201 extracellular matrix structural constituent; GO:0097367 carbohydrate derivative binding; GO:0005488 binding; GO:004316…	K04659	THBS2S; thrombospondin 2/3/4/5	hsa04145 Phagosome - Homo sapiens (human); hsa04151 PI3K-Akt signaling pathway - Homo sapiens (human); hsa04510 Focal adhesion - Homo sapiens (human); hsa04512 ECM-receptor interaction - Homo sapiens (human); hsa05144 Malaria - Homo sapiens (human); hsa05165 Human papillomavirus infection - Homo sapiens (human);	IPR024665; IPR008859; IPR001881; IPR000742; IPR009030; IPR013320;	Thrombospondin/cartilage oligomeric matrix protein, coiled-coil domain; Thrombospondin, C-terminal; EGF-like calcium-binding domain; EGF-like domain; Growth factor receptor cysteine-rich domain; Concanavalin A-like lectin/glucanase domain;
P01704	Immunoglobulin lambda variable 2-14 OS=Homo sapiens OX=9606 GN=IGLV2-14 PE=1 SV=2	7.03	Up	4.1294e-06	IGLV2-14	12.597	0.204	0.168	0.201	1.278	1.369	1.381	extracellular	GO:0044700 single organism signaling; GO:0016064 immunoglobulin mediated immune response; GO:0051674 localization of cell; GO:0007166 cell surface receptor signaling pathway; GO:0038094 Fc-gamma receptor signaling pathway; GO:0044699 single-organism process; GO:0006909 phagocytosis; GO:0051234 establishment of localization; GO:0006956 complement activation; GO:0007165 signal transduction; GO:0008…	GO:0070062 extracellular exosome; GO:0043226 organelle; GO:0016020 membrane; GO:0044421 extracellular region part; GO:0044464 cell part; GO:0071944 cell periphery; GO:0031982 vesicle; GO:1903561 extracellular vesicle; GO:0043227 membrane-bounded organelle; GO:0005623 cell; GO:0005576 extracellular region; GO:0043230 extracellular organelle; GO:0005886 plasma membrane;	GO:0004252 serine-type endopeptidase activity; GO:0004175 endopeptidase activity; GO:0008233 peptidase activity; GO:0003824 catalytic activity; GO:0017171 serine hydrolase activity; GO:0005488 binding; GO:0008236 serine-type peptidase activity; GO:0070011 peptidase activity, acting on L-amino acid peptides; GO:0016787 hydrolase activity; GO:0005515 protein binding; GO:0003823 antigen binding;				IPR007110; IPR013783; IPR003599; IPR013106;	Immunoglobulin-like domain; Immunoglobulin-like fold; Immunoglobulin subtype; Immunoglobulin V-set domain;
P27169	Serum paraoxonase/arylesterase 1 OS=Homo sapiens OX=9606 GN=PON1 PE=1 SV=3	0.616	Down	0.0001811	PON1	39.731	1.046	1.043	1.084	0.624	0.633	0.696	extracellular	GO:0046470 phosphatidylcholine metabolic process; GO:0001101 response to acid chemical; GO:0046486 glycerolipid metabolic process; GO:0032371 regulation of sterol transport; GO:0006066 alcohol metabolic process; GO:1901568 fatty acid derivative metabolic process; GO:0044699 single-organism process; GO:0044255 cellular lipid metabolic process; GO:0044237 cellular metabolic process; GO:0006796 phos…	GO:0043229 intracellular organelle; GO:0005615 extracellular space; GO:0044421 extracellular region part; GO:0031982 vesicle; GO:0034358 plasma lipoprotein particle; GO:0032991 macromolecular complex; GO:0044424 intracellular part; GO:0034364 high-density lipoprotein particle; GO:0005623 cell; GO:0005576 extracellular region; GO:0043231 intracellular membrane-bounded organelle; GO:0043226 organel…	GO:0004063 aryldialkylphosphatase activity; GO:0052689 carboxylic ester hydrolase activity; GO:0102007 acyl-L-homoserine-lactone lactonohydrolase activity; GO:0016791 phosphatase activity; GO:0043167 ion binding; GO:0046983 protein dimerization activity; GO:0005515 protein binding; GO:0016787 hydrolase activity; GO:0042802 identical protein binding; GO:0004064 arylesterase activity; GO:0042578 ph…	K01045	PON; arylesterase / paraoxonase [EC:3.1.1.2 3.1.8.1]		IPR011042;	Six-bladed beta-propeller, TolB-like;
P0DOX3	Immunoglobulin delta heavy chain OS=Homo sapiens OX=9606 PE=1 SV=1	1.277	Up	0.024836	---	56.224	1.341	1.173	1.125	1.534	1.68	1.434	nucleus			GO:0005515 protein binding; GO:0005488 binding;	K06856	IGH; immunoglobulin heavy chain	hsa04020 Calcium signaling pathway - Homo sapiens (human); hsa04064 NF-kappa B signaling pathway - Homo sapiens (human); hsa04072 Phospholipase D signaling pathway - Homo sapiens (human); hsa04145 Phagosome - Homo sapiens (human); hsa04151 PI3K-Akt signaling pathway - Homo sapiens (human); hsa04640 Hematopoietic cell lineage - Homo sapiens (human); hsa04650 Natural killer cell mediated cytotoxici…	IPR007110; IPR013783; IPR003599; IPR013106; IPR013151; IPR003597;	Immunoglobulin-like domain; Immunoglobulin-like fold; Immunoglobulin subtype; Immunoglobulin V-set domain; Immunoglobulin; Immunoglobulin C1-set;
P05154	Plasma serine protease inhibitor OS=Homo sapiens OX=9606 GN=SERPINA5 PE=1 SV=3	0.343	Down	0.000115758	SERPINA5	45.674	2.269	1.925	1.888	0.716	0.641	0.728	extracellular	GO:0007596 blood coagulation; GO:0065008 regulation of biological quality; GO:0048732 gland development; GO:0022414 reproductive process; GO:0061107 seminal vesicle development; GO:0044699 single-organism process; GO:0051234 establishment of localization; GO:0009611 response to wounding; GO:0010466 negative regulation of peptidase activity; GO:0007342 fusion of sperm to egg plasma membrane; GO:00…	GO:0016020 membrane; GO:0036029 protein C inhibitor-KLK3 complex; GO:0005615 extracellular space; GO:0044421 extracellular region part; GO:0097181 protein C inhibitor-coagulation factor V complex; GO:0009897 external side of plasma membrane; GO:0031090 organelle membrane; GO:0031410 cytoplasmic vesicle; GO:0071944 cell periphery; GO:0097182 protein C inhibitor-coagulation factor Xa complex; GO:00…	GO:0032190 acrosin binding; GO:0070405 ammonium ion binding; GO:0061134 peptidase regulator activity; GO:0005515 protein binding; GO:0098772 molecular function regulator; GO:0004857 enzyme inhibitor activity; GO:0008201 heparin binding; GO:0031210 phosphatidylcholine binding; GO:0050997 quaternary ammonium group binding; GO:0031406 carboxylic acid binding; GO:0005488 binding; GO:0030414 peptidase…	K03913	SERPINA5, PCI; protein C inhibitor	hsa04610 Complement and coagulation cascades - Homo sapiens (human);	IPR023796;	Serpin domain;
P35555	Fibrillin-1 OS=Homo sapiens OX=9606 GN=FBN1 PE=1 SV=3	0.66	Down	0.0027019	FBN1	312.24	1.244	1.013	1.115	0.719	0.767	0.741	nucleus	GO:0048569 post-embryonic animal organ development; GO:0044700 single organism signaling; GO:0065008 regulation of biological quality; GO:0032270 positive regulation of cellular protein metabolic process; GO:0002762 negative regulation of myeloid leukocyte differentiation; GO:0042593 glucose homeostasis; GO:0035582 sequestering of BMP in extracellular matrix; GO:1903845 negative regulation of cel…	GO:0005615 extracellular space; GO:0044421 extracellular region part; GO:0031982 vesicle; GO:0099512 supramolecular fiber; GO:0005623 cell; GO:0001527 microfibril; GO:0099080 supramolecular complex; GO:0044420 extracellular matrix component; GO:0005576 extracellular region; GO:0099081 supramolecular polymer; GO:0005604 basement membrane; GO:0031012 extracellular matrix; GO:0043226 organelle; GO:0…	GO:0005102 receptor binding; GO:0043167 ion binding; GO:0044877 macromolecular complex binding; GO:0005179 hormone activity; GO:0030023 extracellular matrix constituent conferring elasticity; GO:0005178 integrin binding; GO:0005515 protein binding; GO:0008201 heparin binding; GO:1901681 sulfur compound binding; GO:0097493 structural molecule activity conferring elasticity; GO:0005201 extracellula…	K06825	FBN1; fibrillin 1		IPR026823; IPR017878; IPR001881; IPR000742; IPR009030;	Complement Clr-like EGF domain; TB domain; EGF-like calcium-binding domain; EGF-like domain; Growth factor receptor cysteine-rich domain;
Q9HC84	Mucin-5B OS=Homo sapiens OX=9606 GN=MUC5B PE=1 SV=3	71.201	Up	0.000160205	MUC5B	596.33		0.073	0.066		4.852	5.045	extracellular	GO:0044700 single organism signaling; GO:0043413 macromolecule glycosylation; GO:0002694 regulation of leukocyte activation; GO:0002220 innate immune response activating cell surface receptor signaling pathway; GO:0043030 regulation of macrophage activation; GO:0007166 cell surface receptor signaling pathway; GO:0098542 defense response to other organism; GO:0044699 single-organism process; GO:00…	GO:0016020 membrane; GO:0043229 intracellular organelle; GO:0005615 extracellular space; GO:0044421 extracellular region part; GO:0071944 cell periphery; GO:0005737 cytoplasm; GO:0044446 intracellular organelle part; GO:0031982 vesicle; GO:0005796 Golgi lumen; GO:0012505 endomembrane system; GO:0044424 intracellular part; GO:0005623 cell; GO:0005576 extracellular region; GO:0044422 organelle part…	GO:0005515 protein binding; GO:0005488 binding;	K13908	MUC5B, MG1; mucin-5B	hsa04657 IL-17 signaling pathway - Homo sapiens (human); hsa04970 Salivary secretion - Homo sapiens (human);	IPR014853; IPR025155; IPR002919; IPR001007; IPR001846; IPR006207;	Uncharacterised domain, cysteine-rich; WxxW domain; Trypsin Inhibitor-like, cysteine rich domain; VWFC domain; von Willebrand factor, type D domain; Cystine knot, C-terminal;
P08493	Matrix Gla protein OS=Homo sapiens OX=9606 GN=MGP PE=1 SV=2	4.915	Up	0.00068025	MGP	12.353	0.588	0.353	0.362	1.984	2.171	2.249	extracellular	GO:0032502 developmental process; GO:0044707 single-multicellular organism process; GO:0009888 tissue development; GO:0051216 cartilage development; GO:0001503 ossification; GO:0048731 system development; GO:0048869 cellular developmental process; GO:0044763 single-organism cellular process; GO:0044699 single-organism process; GO:0030500 regulation of bone mineralization; GO:0098743 cell aggregat…	GO:0031012 extracellular matrix; GO:0070062 extracellular exosome; GO:0043226 organelle; GO:0044421 extracellular region part; GO:0031982 vesicle; GO:1903561 extracellular vesicle; GO:0005578 proteinaceous extracellular matrix; GO:0043227 membrane-bounded organelle; GO:0005576 extracellular region; GO:0043230 extracellular organelle;	GO:0005201 extracellular matrix structural constituent; GO:0005488 binding; GO:0043167 ion binding; GO:0046872 metal ion binding; GO:0043169 cation binding; GO:0005515 protein binding; GO:0005509 calcium ion binding; GO:0005198 structural molecule activity; GO:0008147 structural constituent of bone;	K19481	MGP; matrix Gla protein		IPR000294;	Gamma-carboxyglutamic acid-rich (GLA) domain;
P19827	Inter-alpha-trypsin inhibitor heavy chain H1 OS=Homo sapiens OX=9606 GN=ITIH1 PE=1 SV=3	0.82	Down	6.3788e-05	ITIH1	101.39	0.87	0.874	0.861	0.727	0.704	0.704	endoplasmic reticulum	GO:0050794 regulation of cellular process; GO:0010951 negative regulation of endopeptidase activity; GO:0060255 regulation of macromolecule metabolic process; GO:0048523 negative regulation of cellular process; GO:0048519 negative regulation of biological process; GO:0031324 negative regulation of cellular metabolic process; GO:0051346 negative regulation of hydrolase activity; GO:0030203 glycosa…	GO:0070062 extracellular exosome; GO:0043226 organelle; GO:0072562 blood microparticle; GO:0005615 extracellular space; GO:0044421 extracellular region part; GO:0031982 vesicle; GO:1903561 extracellular vesicle; GO:0043227 membrane-bounded organelle; GO:0005576 extracellular region; GO:0043230 extracellular organelle;	GO:0004867 serine-type endopeptidase inhibitor activity; GO:0030234 enzyme regulator activity; GO:0005488 binding; GO:0043167 ion binding; GO:0030414 peptidase inhibitor activity; GO:0061134 peptidase regulator activity; GO:0043169 cation binding; GO:0046872 metal ion binding; GO:0061135 endopeptidase regulator activity; GO:0005509 calcium ion binding; GO:0098772 molecular function regulator; GO:…	K19014	ITIH1, SHAP; inter-alpha-trypsin inhibitor heavy chain H1		IPR010600; IPR013694; IPR002035;	Inter-alpha-trypsin inhibitor heavy chain, C-terminal; VIT domain; von Willebrand factor, type A;
Q8NDA8	Maestro heat-like repeat-containing protein family member 1 OS=Homo sapiens OX=9606 GN=MROH1 PE=2 SV=3	0.642	Down	0.00182284	MROH1	181.25	1.275	1.134	1.145	0.694	0.815	0.773	plasma membrane			GO:0005515 protein binding; GO:0005488 binding;				IPR011989; IPR016024;	Armadillo-like helical; Armadillo-type fold;
A0A0C4DH72	Immunoglobulin kappa variable 1-6 OS=Homo sapiens OX=9606 GN=IGKV1-6 PE=3 SV=1	1.436	Up	0.0050602	IGKV1-6	12.697	1.196	1.032	0.967	1.476	1.541	1.57	extracellular	GO:0002376 immune system process; GO:0006955 immune response; GO:0050896 response to stimulus; GO:0002377 immunoglobulin production; GO:0002440 production of molecular mediator of immune response; GO:0002250 adaptive immune response;	GO:0016020 membrane; GO:0005615 extracellular space; GO:0044421 extracellular region part; GO:0044464 cell part; GO:0071944 cell periphery; GO:0005623 cell; GO:0005576 extracellular region; GO:0005886 plasma membrane;	GO:0005515 protein binding; GO:0003823 antigen binding; GO:0005488 binding;				IPR007110; IPR013783; IPR003599; IPR013106;	Immunoglobulin-like domain; Immunoglobulin-like fold; Immunoglobulin subtype; Immunoglobulin V-set domain;
P00740	Coagulation factor IX OS=Homo sapiens OX=9606 GN=F9 PE=1 SV=2	0.737	Down	0.0127631	F9	51.778	0.943	0.925	0.843	0.664	0.669	0.665	extracellular	GO:0046907 intracellular transport; GO:0044707 single-multicellular organism process; GO:0007596 blood coagulation; GO:0065008 regulation of biological quality; GO:0006518 peptide metabolic process; GO:0007598 blood coagulation, extrinsic pathway; GO:0006465 signal peptide processing; GO:0044267 cellular protein metabolic process; GO:0048193 Golgi vesicle transport; GO:0044699 single-organism pro…	GO:0016020 membrane; GO:0005615 extracellular space; GO:0044421 extracellular region part; GO:0005783 endoplasmic reticulum; GO:0071944 cell periphery; GO:0031982 vesicle; GO:0005737 cytoplasm; GO:0044424 intracellular part; GO:0005623 cell; GO:0044422 organelle part; GO:0070062 extracellular exosome; GO:0031974 membrane-enclosed lumen; GO:0070013 intracellular organelle lumen; GO:0044464 cell pa…	GO:0004252 serine-type endopeptidase activity; GO:0004175 endopeptidase activity; GO:0008233 peptidase activity; GO:0017171 serine hydrolase activity; GO:0003824 catalytic activity; GO:0005488 binding; GO:0043167 ion binding; GO:0008236 serine-type peptidase activity; GO:0046872 metal ion binding; GO:0043169 cation binding; GO:0070011 peptidase activity, acting on L-amino acid peptides; GO:001678…	K01321	F9; coagulation factor IX (Christmas factor) [EC:3.4.21.22]	hsa04610 Complement and coagulation cascades - Homo sapiens (human);	IPR009003; IPR017857; IPR000294; IPR001254; IPR001881; IPR000742;	Peptidase S1, PA clan; Coagulation factor, subgroup, Gla domain; Gamma-carboxyglutamic acid-rich (GLA) domain; Serine proteases, trypsin domain; EGF-like calcium-binding domain; EGF-like domain;
A0A0B4J1Y8	Immunoglobulin lambda variable 9-49 OS=Homo sapiens OX=9606 GN=IGLV9-49 PE=1 SV=1	1.65	Up	0.00028107	IGLV9-49	13.024	1.124	1.052	0.985	1.725	1.693	1.798	extracellular	GO:0002376 immune system process; GO:0006955 immune response; GO:0050896 response to stimulus; GO:0002377 immunoglobulin production; GO:0002440 production of molecular mediator of immune response; GO:0002250 adaptive immune response;	GO:0016020 membrane; GO:0005615 extracellular space; GO:0044421 extracellular region part; GO:0044464 cell part; GO:0071944 cell periphery; GO:0005623 cell; GO:0005576 extracellular region; GO:0005886 plasma membrane;	GO:0005515 protein binding; GO:0003823 antigen binding; GO:0005488 binding;	K06553	VPREB, CD179a; pre-B lymphocyte gene		IPR003598; IPR007110; IPR013783; IPR013106; IPR003599;	Immunoglobulin subtype 2; Immunoglobulin-like domain; Immunoglobulin-like fold; Immunoglobulin V-set domain; Immunoglobulin subtype;
P16070	CD44 antigen OS=Homo sapiens OX=9606 GN=CD44 PE=1 SV=3	0.574	Down	1.90807e-05	CD44	81.537	1.355	1.378	1.391	0.756	0.801	0.812	extracellular,plasma membrane	GO:0044700 single organism signaling; GO:0010941 regulation of cell death; GO:0045321 leukocyte activation; GO:0032270 positive regulation of cellular protein metabolic process; GO:0007166 cell surface receptor signaling pathway; GO:0070486 leukocyte aggregation; GO:0071345 cellular response to cytokine stimulus; GO:0030203 glycosaminoglycan metabolic process; GO:0022610 biological adhesion; GO:0…	GO:0016020 membrane; GO:0044421 extracellular region part; GO:0031090 organelle membrane; GO:0031410 cytoplasmic vesicle; GO:0030054 cell junction; GO:0071944 cell periphery; GO:0005737 cytoplasm; GO:0031982 vesicle; GO:0044433 cytoplasmic vesicle part; GO:0032991 macromolecular complex; GO:0031224 intrinsic component of membrane; GO:0044424 intracellular part; GO:0005887 integral component of pl…	GO:0097367 carbohydrate derivative binding; GO:0005488 binding; GO:0005540 hyaluronic acid binding; GO:0044877 macromolecular complex binding; GO:0005515 protein binding; GO:0005518 collagen binding; GO:0005539 glycosaminoglycan binding; GO:0032403 protein complex binding;	K06256	CD44; CD44 antigen	hsa04512 ECM-receptor interaction - Homo sapiens (human); hsa04640 Hematopoietic cell lineage - Homo sapiens (human); hsa05131 Shigellosis - Homo sapiens (human); hsa05169 Epstein-Barr virus infection - Homo sapiens (human); hsa05205 Proteoglycans in cancer - Homo sapiens (human); hsa05206 MicroRNAs in cancer - Homo sapiens (human);	IPR016187; IPR000538; IPR016186;	C-type lectin fold; Link domain; C-type lectin-like/link domain;
P02790	Hemopexin OS=Homo sapiens OX=9606 GN=HPX PE=1 SV=2	1.313	Up	2.3184e-05	HPX	51.676	0.938	0.939	0.919	1.229	1.2	1.243	extracellular	GO:0065008 regulation of biological quality; GO:0032270 positive regulation of cellular protein metabolic process; GO:0002824 positive regulation of adaptive immune response based on somatic recombination of immune receptors built from immunoglobulin superfamily domains; GO:0060330 regulation of response to interferon-gamma; GO:0031347 regulation of defense response; GO:0060332 positive regulatio…	GO:0043229 intracellular organelle; GO:0097708 intracellular vesicle; GO:0005615 extracellular space; GO:0044421 extracellular region part; GO:0031410 cytoplasmic vesicle; GO:0005737 cytoplasm; GO:0044446 intracellular organelle part; GO:0031982 vesicle; GO:0044433 cytoplasmic vesicle part; GO:0044424 intracellular part; GO:0005623 cell; GO:0005576 extracellular region; GO:0044422 organelle part;…	GO:0015232 heme transporter activity; GO:0005488 binding; GO:0043167 ion binding; GO:0043169 cation binding; GO:0046872 metal ion binding; GO:0005515 protein binding; GO:0051184 cofactor transporter activity; GO:0005215 transporter activity;	K18977	HPX; hemopexin		IPR000585;	Hemopexin-like domain;
P01718	Immunoglobulin lambda variable 3-27 OS=Homo sapiens OX=9606 GN=IGLV3-27 PE=1 SV=2	1.494	Up	0.0033962	IGLV3-27	12.165	1.019	0.902	1.082	1.408	1.596	1.482	extracellular	GO:0044700 single organism signaling; GO:0016064 immunoglobulin mediated immune response; GO:0051674 localization of cell; GO:0007166 cell surface receptor signaling pathway; GO:0038094 Fc-gamma receptor signaling pathway; GO:0044699 single-organism process; GO:0006909 phagocytosis; GO:0051234 establishment of localization; GO:0006956 complement activation; GO:0007165 signal transduction; GO:0008…	GO:0016020 membrane; GO:0005623 cell; GO:0044464 cell part; GO:0071944 cell periphery; GO:0005576 extracellular region; GO:0005886 plasma membrane;	GO:0004252 serine-type endopeptidase activity; GO:0004175 endopeptidase activity; GO:0008233 peptidase activity; GO:0003824 catalytic activity; GO:0017171 serine hydrolase activity; GO:0005488 binding; GO:0008236 serine-type peptidase activity; GO:0070011 peptidase activity, acting on L-amino acid peptides; GO:0016787 hydrolase activity; GO:0005515 protein binding; GO:0003823 antigen binding;				IPR007110; IPR013783; IPR013106; IPR003599;	Immunoglobulin-like domain; Immunoglobulin-like fold; Immunoglobulin V-set domain; Immunoglobulin subtype;
P31947	14-3-3 protein sigma OS=Homo sapiens OX=9606 GN=SFN PE=1 SV=1	0.24	Down	6.4854e-05	SFN	27.774	2.077	2.313	2.181	0.594	0.454	0.532	cytoplasm,nucleus	GO:0044700 single organism signaling; GO:1902807 negative regulation of cell cycle G1/S phase transition; GO:0065008 regulation of biological quality; GO:0010941 regulation of cell death; GO:0010837 regulation of keratinocyte proliferation; GO:0031424 keratinization; GO:0030858 positive regulation of epithelial cell differentiation; GO:0010564 regulation of cell cycle process; GO:0010821 regulati…	GO:0016020 membrane; GO:0097708 intracellular vesicle; GO:0043229 intracellular organelle; GO:0005615 extracellular space; GO:0044421 extracellular region part; GO:0031090 organelle membrane; GO:0031410 cytoplasmic vesicle; GO:0044446 intracellular organelle part; GO:0031982 vesicle; GO:0005737 cytoplasm; GO:0044433 cytoplasmic vesicle part; GO:0012506 vesicle membrane; GO:0044424 intracellular p…	GO:0030291 protein serine/threonine kinase inhibitor activity; GO:0019901 protein kinase binding; GO:0004860 protein kinase inhibitor activity; GO:0008426 protein kinase C inhibitor activity; GO:0005515 protein binding; GO:0019207 kinase regulator activity; GO:0019887 protein kinase regulator activity; GO:0004857 enzyme inhibitor activity; GO:0098772 molecular function regulator; GO:0019900 kinas…	K06644	SFN; stratifin	hsa04110 Cell cycle - Homo sapiens (human); hsa04115 p53 signaling pathway - Homo sapiens (human); hsa04960 Aldosterone-regulated sodium reabsorption - Homo sapiens (human);	IPR023410;	14-3-3 domain;
P04350	Tubulin beta-4A chain OS=Homo sapiens OX=9606 GN=TUBB4A PE=1 SV=2	0.244	Down	0.043762	TUBB4A	49.585		1.866	1.606		0.298	0.549	cytoplasm,nucleus	GO:0044085 cellular component biogenesis; GO:0000278 mitotic cell cycle; GO:0016043 cellular component organization; GO:0044763 single-organism cellular process; GO:0060271 cilium assembly; GO:0044699 single-organism process; GO:0097711 ciliary basal body docking; GO:1903047 mitotic cell cycle process; GO:0007017 microtubule-based process; GO:0022406 membrane docking; GO:0044782 cilium organizati…	GO:0044421 extracellular region part; GO:0005874 microtubule; GO:0031982 vesicle; GO:0005737 cytoplasm; GO:0043025 neuronal cell body; GO:0044424 intracellular part; GO:0099512 supramolecular fiber; GO:0099080 supramolecular complex; GO:0005623 cell; GO:0044422 organelle part; GO:0043228 non-membrane-bounded organelle; GO:0070062 extracellular exosome; GO:0005856 cytoskeleton; GO:0015630 microtub…	GO:1901265 nucleoside phosphate binding; GO:0001882 nucleoside binding; GO:0043167 ion binding; GO:0016817 hydrolase activity, acting on acid anhydrides; GO:0016787 hydrolase activity; GO:0005515 protein binding; GO:0000166 nucleotide binding; GO:0017111 nucleoside-triphosphatase activity; GO:1901363 heterocyclic compound binding; GO:0097159 organic cyclic compound binding; GO:0032549 ribonucleos…	K07375	TUBB; tubulin beta	hsa04145 Phagosome - Homo sapiens (human); hsa04540 Gap junction - Homo sapiens (human); hsa05130 Pathogenic Escherichia coli infection - Homo sapiens (human);	IPR003008; IPR023123; IPR008280; IPR018316;	Tubulin/FtsZ, GTPase domain; Tubulin, C-terminal; Tubulin/FtsZ, C-terminal; Tubulin/FtsZ, 2-layer sandwich domain;
P00738	Haptoglobin OS=Homo sapiens OX=9606 GN=HP PE=1 SV=1	2.7	Up	3.2712e-07	HP	45.205	0.373	0.373	0.389	1.045	1.012	1.008	extracellular	GO:0010941 regulation of cell death; GO:0045321 leukocyte activation; GO:0098542 defense response to other organism; GO:0044699 single-organism process; GO:0051234 establishment of localization; GO:0009607 response to biotic stimulus; GO:0009605 response to external stimulus; GO:0008152 metabolic process; GO:0006979 response to oxidative stress; GO:0098869 cellular oxidant detoxification; GO:0043…	GO:0034774 secretory granule lumen; GO:1904724 tertiary granule lumen; GO:0005615 extracellular space; GO:0044421 extracellular region part; GO:0031410 cytoplasmic vesicle; GO:0005737 cytoplasm; GO:0031982 vesicle; GO:0044433 cytoplasmic vesicle part; GO:0032991 macromolecular complex; GO:0044424 intracellular part; GO:0005623 cell; GO:0044422 organelle part; GO:0070062 extracellular exosome; GO:…	GO:0004252 serine-type endopeptidase activity; GO:0004175 endopeptidase activity; GO:0008233 peptidase activity; GO:0003824 catalytic activity; GO:0017171 serine hydrolase activity; GO:0005488 binding; GO:0008236 serine-type peptidase activity; GO:0016209 antioxidant activity; GO:0070011 peptidase activity, acting on L-amino acid peptides; GO:0030492 hemoglobin binding; GO:0016787 hydrolase activ…	K16142	HP; haptoglobin		IPR009003; IPR000436; IPR001254;	Peptidase S1, PA clan; Sushi/SCR/CCP domain; Serine proteases, trypsin domain;
P01591	Immunoglobulin J chain OS=Homo sapiens OX=9606 GN=JCHAIN PE=1 SV=4	0.748	Down	0.00075657	JCHAIN	18.098	1.11	1.093	1.023	0.806	0.778	0.83	extracellular	GO:0050794 regulation of cellular process; GO:0044707 single-multicellular organism process; GO:0016477 cell migration; GO:0065008 regulation of biological quality; GO:0051674 localization of cell; GO:0098542 defense response to other organism; GO:0044699 single-organism process; GO:0060263 regulation of respiratory burst; GO:0006959 humoral immune response; GO:0044087 regulation of cellular comp…	GO:0071756 pentameric IgM immunoglobulin complex; GO:0044421 extracellular region part; GO:0005615 extracellular space; GO:0042571 immunoglobulin complex, circulating; GO:0031982 vesicle; GO:0019814 immunoglobulin complex; GO:0032991 macromolecular complex; GO:0071746 IgA immunoglobulin complex, circulating; GO:0071745 IgA immunoglobulin complex; GO:0005576 extracellular region; GO:0071754 IgM im…	GO:0042802 identical protein binding; GO:0030674 protein binding, bridging; GO:0019862 IgA binding; GO:0019865 immunoglobulin binding; GO:0005102 receptor binding; GO:0042803 protein homodimerization activity; GO:0005488 binding; GO:0046983 protein dimerization activity; GO:0044877 macromolecular complex binding; GO:0034987 immunoglobulin receptor binding; GO:0060090 binding, bridging; GO:0005515…
Q07507	Dermatopontin OS=Homo sapiens OX=9606 GN=DPT PE=1 SV=2	1.58	Up	0.00142184	DPT	24.005	1.023	0.917	0.93	1.374	1.569	1.593	extracellular	GO:0050794 regulation of cellular process; GO:0016043 cellular component organization; GO:0071822 protein complex subunit organization; GO:0042127 regulation of cell proliferation; GO:0030199 collagen fibril organization; GO:0044763 single-organism cellular process; GO:0044699 single-organism process; GO:0048523 negative regulation of cellular process; GO:0048519 negative regulation of biological…	GO:0031012 extracellular matrix; GO:0070062 extracellular exosome; GO:0043226 organelle; GO:0005615 extracellular space; GO:0044421 extracellular region part; GO:0031982 vesicle; GO:1903561 extracellular vesicle; GO:0005578 proteinaceous extracellular matrix; GO:0043227 membrane-bounded organelle; GO:0005576 extracellular region; GO:0043230 extracellular organelle;
Q0VD83	Apolipoprotein B receptor OS=Homo sapiens OX=9606 GN=APOBR PE=1 SV=2	0.419	Down	9.9011e-05	APOBR	114.87	1.427	1.371	1.247	0.526	0.601	0.569	nucleus	GO:0046486 glycerolipid metabolic process; GO:1901615 organic hydroxy compound metabolic process; GO:1902652 secondary alcohol metabolic process; GO:0006066 alcohol metabolic process; GO:0044699 single-organism process; GO:0044255 cellular lipid metabolic process; GO:0044237 cellular metabolic process; GO:0016125 sterol metabolic process; GO:0042157 lipoprotein metabolic process; GO:0071704 organ…	GO:0016020 membrane; GO:0044421 extracellular region part; GO:0005615 extracellular space; GO:0071944 cell periphery; GO:0034362 low-density lipoprotein particle; GO:0034358 plasma lipoprotein particle; GO:0034385 triglyceride-rich plasma lipoprotein particle; GO:0032991 macromolecular complex; GO:0042627 chylomicron; GO:0005623 cell; GO:0034361 very-low-density lipoprotein particle; GO:0005576 e…	GO:0030228 lipoprotein particle receptor activity; GO:0038024 cargo receptor activity; GO:0030229 very-low-density lipoprotein particle receptor activity; GO:0060089 molecular transducer activity; GO:0004872 receptor activity;
P06396	Gelsolin OS=Homo sapiens OX=9606 GN=GSN PE=1 SV=1	0.752	Down	0.023461	GSN	85.696	1.41	1.384	1.593	1.1	1.104	1.094	endoplasmic reticulum	GO:0044700 single organism signaling; GO:0044085 cellular component biogenesis; GO:0002694 regulation of leukocyte activation; GO:0010941 regulation of cell death; GO:1903903 regulation of establishment of T cell polarity; GO:0044237 cellular metabolic process; GO:0044782 cilium organization; GO:0008152 metabolic process; GO:0065003 macromolecular complex assembly; GO:0044093 positive regulation …	GO:0034774 secretory granule lumen; GO:0016020 membrane; GO:0005615 extracellular space; GO:0044421 extracellular region part; GO:0005938 cell cortex; GO:0031410 cytoplasmic vesicle; GO:0071944 cell periphery; GO:0030054 cell junction; GO:0099568 cytoplasmic region; GO:0031982 vesicle; GO:0005737 cytoplasm; GO:0030863 cortical cytoskeleton; GO:0044433 cytoplasmic vesicle part; GO:0032991 macromol…	GO:0045159 myosin II binding; GO:0008092 cytoskeletal protein binding; GO:0005488 binding; GO:0043167 ion binding; GO:0003779 actin binding; GO:0046872 metal ion binding; GO:0043169 cation binding; GO:0019904 protein domain specific binding; GO:0005515 protein binding; GO:0005509 calcium ion binding; GO:0017022 myosin binding;	K05768	GSN; gelsolin	hsa04666 Fc gamma R-mediated phagocytosis - Homo sapiens (human); hsa04810 Regulation of actin cytoskeleton - Homo sapiens (human); hsa05203 Viral carcinogenesis - Homo sapiens (human);	IPR029006; IPR007123;	ADF-H/Gelsolin-like domain; Gelsolin-like domain;
P35858	Insulin-like growth factor-binding protein complex acid labile subunit OS=Homo sapiens OX=9606 GN=IGFALS PE=1 SV=1	1.254	Up	0.048681	IGFALS	66.034	1.197	1.058	1.148	1.273	1.618	1.376	extracellular	GO:0050794 regulation of cellular process; GO:0044700 single organism signaling; GO:0051716 cellular response to stimulus; GO:0044267 cellular protein metabolic process; GO:0044699 single-organism process; GO:0044238 primary metabolic process; GO:0023052 signaling; GO:0050896 response to stimulus; GO:0044237 cellular metabolic process; GO:0071704 organic substance metabolic process; GO:0022610 bi…	GO:0043229 intracellular organelle; GO:0042567 insulin-like growth factor ternary complex; GO:0005615 extracellular space; GO:0044421 extracellular region part; GO:0044446 intracellular organelle part; GO:0031982 vesicle; GO:0031981 nuclear lumen; GO:0032991 macromolecular complex; GO:0044424 intracellular part; GO:0005623 cell; GO:0036454 growth factor complex; GO:0005576 extracellular region; G…	GO:0005520 insulin-like growth factor binding; GO:0005515 protein binding; GO:0019838 growth factor binding; GO:0005488 binding;	K17256	IGFALS, ALS; insulin-like growth factor-binding protein complex acid labile subunit		IPR000483; IPR000372; IPR032675;	Cysteine-rich flanking region, C-terminal; Leucine-rich repeat N-terminal domain; Leucine-rich repeat domain, L domain-like;
P06702	Protein S100-A9 OS=Homo sapiens OX=9606 GN=S100A9 PE=1 SV=1	0.097	Down	1.1513e-06	S100A9	13.242	3.046	3.093	3.348	0.333	0.28	0.309	cytoplasm	GO:0044700 single organism signaling; GO:0010941 regulation of cell death; GO:0010608 posttranscriptional regulation of gene expression; GO:0098542 defense response to other organism; GO:0002793 positive regulation of peptide secretion; GO:0031347 regulation of defense response; GO:0006914 autophagy; GO:0044237 cellular metabolic process; GO:0045927 positive regulation of growth; GO:0009607 respo…	GO:0016020 membrane; GO:0034774 secretory granule lumen; GO:0005615 extracellular space; GO:0044421 extracellular region part; GO:0031410 cytoplasmic vesicle; GO:0071944 cell periphery; GO:0030054 cell junction; GO:0031982 vesicle; GO:0005737 cytoplasm; GO:0044433 cytoplasmic vesicle part; GO:0044424 intracellular part; GO:0005623 cell; GO:0044422 organelle part; GO:0043228 non-membrane-bounded o…	GO:0036041 long-chain fatty acid binding; GO:0005102 receptor binding; GO:0050544 arachidonic acid binding; GO:0043167 ion binding; GO:0050543 icosatetraenoic acid binding; GO:0016209 antioxidant activity; GO:0035325 Toll-like receptor binding; GO:0015631 tubulin binding; GO:0043177 organic acid binding; GO:0005515 protein binding; GO:0008270 zinc ion binding; GO:0033293 monocarboxylic acid bindi…	K21128	S100A9; protein S100-A9	hsa04657 IL-17 signaling pathway - Homo sapiens (human);	IPR002048; IPR011992; IPR013787;	EF-hand domain; EF-hand domain pair; S100/CaBP-9k-type, calcium binding, subdomain;
P10909	Clusterin OS=Homo sapiens OX=9606 GN=CLU PE=1 SV=1	0.808	Down	0.00182088	CLU	52.494	0.903	0.845	0.872	0.702	0.734	0.681	extracellular	GO:0044085 cellular component biogenesis; GO:0044700 single organism signaling; GO:1902430 negative regulation of beta-amyloid formation; GO:0010941 regulation of cell death; GO:1905892 negative regulation of cellular response to thapsigargin; GO:0007272 ensheathment of neurons; GO:0032680 regulation of tumor necrosis factor production; GO:0032436 positive regulation of proteasomal ubiquitin-depe…	GO:0030425 dendrite; GO:0016020 membrane; GO:0044421 extracellular region part; GO:0031090 organelle membrane; GO:0005737 cytoplasm; GO:0044433 cytoplasmic vesicle part; GO:0032991 macromolecular complex; GO:0005623 cell; GO:0044422 organelle part; GO:0070062 extracellular exosome; GO:0005622 intracellular; GO:1990777 lipoprotein particle; GO:0099503 secretory vesicle; GO:0043005 neuron projectio…	GO:0051787 misfolded protein binding; GO:0005515 protein binding; GO:0031625 ubiquitin protein ligase binding; GO:0044389 ubiquitin-like protein ligase binding; GO:0051087 chaperone binding; GO:0005488 binding; GO:0019899 enzyme binding;	K17252	CLU; clusterin	hsa04610 Complement and coagulation cascades - Homo sapiens (human);	IPR016015; IPR016014;	Clusterin, C-terminal; Clusterin, N-terminal;
P62805	Histone H4 OS=Homo sapiens OX=9606 GN=HIST1H4A PE=1 SV=2	0.023	Down	0.00052183	HIST1H4A	11.367	4.657	4.757	4.778	0.13	0.1	0.101	nucleus	GO:0044085 cellular component biogenesis; GO:0065008 regulation of biological quality; GO:0097659 nucleic acid-templated transcription; GO:0016233 telomere capping; GO:0044237 cellular metabolic process; GO:0008152 metabolic process; GO:0034724 DNA replication-independent nucleosome organization; GO:0006334 nucleosome assembly; GO:0065003 macromolecular complex assembly; GO:1904837 beta-catenin-T…	GO:0016020 membrane; GO:0044421 extracellular region part; GO:0000784 nuclear chromosome, telomeric region; GO:0000781 chromosome, telomeric region; GO:0031982 vesicle; GO:0032991 macromolecular complex; GO:0044424 intracellular part; GO:0005623 cell; GO:0044422 organelle part; GO:0044427 chromosomal part; GO:0043228 non-membrane-bounded organelle; GO:0070062 extracellular exosome; GO:0031974 mem…	GO:0097159 organic cyclic compound binding; GO:1901363 heterocyclic compound binding; GO:0042393 histone binding; GO:0003723 RNA binding; GO:0003677 DNA binding; GO:0046982 protein heterodimerization activity; GO:0005488 binding; GO:0046983 protein dimerization activity; GO:0003676 nucleic acid binding; GO:0019904 protein domain specific binding; GO:0005515 protein binding;	K11254	H4; histone H4	hsa05034 Alcoholism - Homo sapiens (human); hsa05203 Viral carcinogenesis - Homo sapiens (human); hsa05322 Systemic lupus erythematosus - Homo sapiens (human);	IPR009072; IPR004823;	Histone-fold; TATA box binding protein associated factor (TAF);
O14818	Proteasome subunit alpha type-7 OS=Homo sapiens OX=9606 GN=PSMA7 PE=1 SV=1	0.528	Down	0.0111409	PSMA7	27.887	1.417	1.038	1.157	0.711	0.503	0.693	cytoplasm	GO:0044700 single organism signaling; GO:0065008 regulation of biological quality; GO:0032270 positive regulation of cellular protein metabolic process; GO:0002220 innate immune response activating cell surface receptor signaling pathway; GO:0007166 cell surface receptor signaling pathway; GO:0010608 posttranscriptional regulation of gene expression; GO:0051443 positive regulation of ubiquitin-pr…	GO:0044421 extracellular region part; GO:0031982 vesicle; GO:0005737 cytoplasm; GO:0032991 macromolecular complex; GO:0044424 intracellular part; GO:0005623 cell; GO:0044422 organelle part; GO:1905369 endopeptidase complex; GO:0031974 membrane-enclosed lumen; GO:0070062 extracellular exosome; GO:1902494 catalytic complex; GO:0005654 nucleoplasm; GO:0070013 intracellular organelle lumen; GO:000562…	GO:0004175 endopeptidase activity; GO:0004298 threonine-type endopeptidase activity; GO:0008233 peptidase activity; GO:0042802 identical protein binding; GO:0070003 threonine-type peptidase activity; GO:0003824 catalytic activity; GO:0005488 binding; GO:0070011 peptidase activity, acting on L-amino acid peptides; GO:0016787 hydrolase activity; GO:0005515 protein binding;	K02731	PSMA7; 20S proteasome subunit alpha 4 [EC:3.4.25.1]	hsa03050 Proteasome - Homo sapiens (human);	IPR029055; IPR000426;	Nucleophile aminohydrolases, N-terminal; Proteasome alpha-subunit, N-terminal domain;
P08697	Alpha-2-antiplasmin OS=Homo sapiens OX=9606 GN=SERPINF2 PE=1 SV=3	0.594	Down	0.00043552	SERPINF2	54.565	1.411	1.416	1.408	0.83	0.828	0.856	extracellular	GO:0065008 regulation of biological quality; GO:0032872 regulation of stress-activated MAPK cascade; GO:0032270 positive regulation of cellular protein metabolic process; GO:0030199 collagen fibril organization; GO:1903318 negative regulation of protein maturation; GO:0009891 positive regulation of biosynthetic process; GO:0002034 regulation of blood vessel diameter by renin-angiotensin; GO:00427…	GO:0034774 secretory granule lumen; GO:0005615 extracellular space; GO:0044421 extracellular region part; GO:0031410 cytoplasmic vesicle; GO:0005737 cytoplasm; GO:0031982 vesicle; GO:0044433 cytoplasmic vesicle part; GO:0032991 macromolecular complex; GO:0044424 intracellular part; GO:0005623 cell; GO:0044422 organelle part; GO:0031974 membrane-enclosed lumen; GO:0070062 extracellular exosome; GO…	GO:0046983 protein dimerization activity; GO:0061134 peptidase regulator activity; GO:0005515 protein binding; GO:0004857 enzyme inhibitor activity; GO:0098772 molecular function regulator; GO:0004866 endopeptidase inhibitor activity; GO:0002020 protease binding; GO:0004867 serine-type endopeptidase inhibitor activity; GO:0042802 identical protein binding; GO:0030234 enzyme regulator activity; GO…	K03983	SERPINF2, AAP; alpha-2-antiplasmin	hsa04610 Complement and coagulation cascades - Homo sapiens (human);	IPR033833; IPR023796;	Alpha2-antiplasmin; Serpin domain;
P52179	Myomesin-1 OS=Homo sapiens OX=9606 GN=MYOM1 PE=1 SV=2	0.579	Down	2.8028e-06	MYOM1	187.62	1.692	1.616	1.625	0.966	0.955	0.937	nucleus	GO:0014706 striated muscle tissue development; GO:0044085 cellular component biogenesis; GO:0055001 muscle cell development; GO:0044707 single-multicellular organism process; GO:0016043 cellular component organization; GO:0043010 camera-type eye development; GO:0003012 muscle system process; GO:0048869 cellular developmental process; GO:0032989 cellular component morphogenesis; GO:0044699 single-…	GO:0030016 myofibril; GO:0005737 cytoplasm; GO:0032991 macromolecular complex; GO:0099512 supramolecular fiber; GO:0044424 intracellular part; GO:0030018 Z disc; GO:0099080 supramolecular complex; GO:0005623 cell; GO:0031674 I band; GO:0044422 organelle part; GO:0005863 striated muscle myosin thick filament; GO:0043228 non-membrane-bounded organelle; GO:0005856 cytoskeleton; GO:0005622 intracellu…	GO:0051015 actin filament binding; GO:0046983 protein dimerization activity; GO:0044877 macromolecular complex binding; GO:0005515 protein binding; GO:0008307 structural constituent of muscle; GO:0051371 muscle alpha-actinin binding; GO:0097493 structural molecule activity conferring elasticity; GO:0008092 cytoskeletal protein binding; GO:0042802 identical protein binding; GO:0005488 binding; GO:…				IPR003598; IPR007110; IPR013783; IPR003599; IPR003961; IPR013098;	Immunoglobulin subtype 2; Immunoglobulin-like domain; Immunoglobulin-like fold; Immunoglobulin subtype; Fibronectin type III; Immunoglobulin I-set;
Q8IUK5	Plexin domain-containing protein 1 OS=Homo sapiens OX=9606 GN=PLXDC1 PE=1 SV=2	0.718	Down	0.0169449	PLXDC1	55.76	1.222	1.322	1.356	0.922	0.81	1.067	extracellular,plasma membrane	GO:0007399 nervous system development; GO:0032502 developmental process; GO:0072359 circulatory system development; GO:0044707 single-multicellular organism process; GO:0021510 spinal cord development; GO:0001568 blood vessel development; GO:0048731 system development; GO:0001944 vasculature development; GO:0044699 single-organism process; GO:0072358 cardiovascular system development; GO:0032501 …	GO:0016020 membrane; GO:0030425 dendrite; GO:0005615 extracellular space; GO:0044421 extracellular region part; GO:0042995 cell projection; GO:0071944 cell periphery; GO:0030054 cell junction; GO:0005737 cytoplasm; GO:0043025 neuronal cell body; GO:0043235 receptor complex; GO:0031224 intrinsic component of membrane; GO:0032991 macromolecular complex; GO:0044424 intracellular part; GO:0005911 cel…	GO:0005515 protein binding; GO:0005488 binding;
P0DP03	Immunoglobulin heavy variable 3-30-5 OS=Homo sapiens OX=9606 GN=IGHV3-30-5 PE=3 SV=1	1.63	Up	0.021905	IGHV3-30-5	12.947	0.942	0.952	0.916	1.511	1.345	1.725	extracellular			GO:0005515 protein binding; GO:0005488 binding;				IPR007110; IPR013783; IPR013106;	Immunoglobulin-like domain; Immunoglobulin-like fold; Immunoglobulin V-set domain;
P11047	Laminin subunit gamma-1 OS=Homo sapiens OX=9606 GN=LAMC1 PE=1 SV=3	0.505	Down	0.04896	LAMC1	177.6	1.363	1.364	1.266	0.722	0.48	0.816	extracellular	GO:0050794 regulation of cellular process; GO:0044085 cellular component biogenesis; GO:0034329 cell junction assembly; GO:0016043 cellular component organization; GO:0044707 single-multicellular organism process; GO:0016477 cell migration; GO:0042127 regulation of cell proliferation; GO:0051674 localization of cell; GO:0048869 cellular developmental process; GO:0032989 cellular component morphog…	GO:0043260 laminin-11 complex; GO:0005615 extracellular space; GO:0044421 extracellular region part; GO:0005606 laminin-1 complex; GO:0031982 vesicle; GO:0032991 macromolecular complex; GO:0044420 extracellular matrix component; GO:0005576 extracellular region; GO:0043256 laminin complex; GO:0005604 basement membrane; GO:0005605 basal lamina; GO:0031012 extracellular matrix; GO:0043226 organelle;…	GO:0005201 extracellular matrix structural constituent; GO:0005515 protein binding; GO:0005198 structural molecule activity; GO:0005488 binding;	K05635	LAMC1; laminin, gamma 1	hsa04151 PI3K-Akt signaling pathway - Homo sapiens (human); hsa04510 Focal adhesion - Homo sapiens (human); hsa04512 ECM-receptor interaction - Homo sapiens (human); hsa05020 Prion diseases - Homo sapiens (human); hsa05145 Toxoplasmosis - Homo sapiens (human); hsa05146 Amoebiasis - Homo sapiens (human); hsa05165 Human papillomavirus infection - Homo sapiens (human); hsa05200 Pathways in cancer - …	IPR000034; IPR002049; IPR000742; IPR008211; IPR008979;	Laminin IV; Laminin EGF domain; EGF-like domain; Laminin, N-terminal; Galactose-binding domain-like;
A0M8Q6	Immunoglobulin lambda constant 7 OS=Homo sapiens OX=9606 GN=IGLC7 PE=1 SV=3	3.366	Up	4.3366e-06	IGLC7	11.253	0.699	0.764	0.696	2.348	2.353	2.566	extracellular	GO:0044700 single organism signaling; GO:0002694 regulation of leukocyte activation; GO:0016064 immunoglobulin mediated immune response; GO:0051674 localization of cell; GO:0007166 cell surface receptor signaling pathway; GO:0038094 Fc-gamma receptor signaling pathway; GO:0098542 defense response to other organism; GO:0044699 single-organism process; GO:0051249 regulation of lymphocyte activation…	GO:0016020 membrane; GO:0044421 extracellular region part; GO:0005615 extracellular space; GO:0009897 external side of plasma membrane; GO:0071944 cell periphery; GO:0042571 immunoglobulin complex, circulating; GO:0019814 immunoglobulin complex; GO:0032991 macromolecular complex; GO:0005623 cell; GO:0005576 extracellular region; GO:0005886 plasma membrane; GO:0072562 blood microparticle; GO:00444…	GO:0004252 serine-type endopeptidase activity; GO:0004175 endopeptidase activity; GO:0008233 peptidase activity; GO:0005102 receptor binding; GO:0003824 catalytic activity; GO:0017171 serine hydrolase activity; GO:0005488 binding; GO:0008236 serine-type peptidase activity; GO:0070011 peptidase activity, acting on L-amino acid peptides; GO:0034987 immunoglobulin receptor binding; GO:0016787 hydrol…				IPR007110; IPR013783; IPR003597;	Immunoglobulin-like domain; Immunoglobulin-like fold; Immunoglobulin C1-set;
O95810	Caveolae-associated protein 2 OS=Homo sapiens OX=9606 GN=CAVIN2 PE=1 SV=3	0.651	Down	0.0024443	CAVIN2	47.173	0.92	0.814	0.914	0.529	0.627	0.567	cytoplasm		GO:0016020 membrane; GO:0098857 membrane microdomain; GO:0071944 cell periphery; GO:0005737 cytoplasm; GO:0005901 caveola; GO:0044424 intracellular part; GO:0005829 cytosol; GO:0005623 cell; GO:0005886 plasma membrane; GO:0044459 plasma membrane part; GO:0098590 plasma membrane region; GO:0005622 intracellular; GO:0044464 cell part; GO:0044425 membrane part; GO:0044853 plasma membrane raft; GO:00…	GO:0072341 modified amino acid binding; GO:0005488 binding; GO:0019901 protein kinase binding; GO:0005543 phospholipid binding; GO:0043167 ion binding; GO:0008289 lipid binding; GO:0005080 protein kinase C binding; GO:0043168 anion binding; GO:0005515 protein binding; GO:0019900 kinase binding; GO:0001786 phosphatidylserine binding; GO:0019899 enzyme binding;
P02679	Fibrinogen gamma chain OS=Homo sapiens OX=9606 GN=FGG PE=1 SV=3	1.449	Up	1.2362e-08	FGG	51.511	0.785	0.781	0.779	1.134	1.128	1.135	mitochondria	GO:0044085 cellular component biogenesis; GO:0044700 single organism signaling; GO:0021700 developmental maturation; GO:0010941 regulation of cell death; GO:0002793 positive regulation of peptide secretion; GO:0070555 response to interleukin-1; GO:0031347 regulation of defense response; GO:0042730 fibrinolysis; GO:0008152 metabolic process; GO:0065003 macromolecular complex assembly; GO:0007160 c…	GO:0034774 secretory granule lumen; GO:0016020 membrane; GO:0005615 extracellular space; GO:0044421 extracellular region part; GO:0005938 cell cortex; GO:0009897 external side of plasma membrane; GO:0031410 cytoplasmic vesicle; GO:0071944 cell periphery; GO:0031982 vesicle; GO:0005737 cytoplasm; GO:0099568 cytoplasmic region; GO:0044433 cytoplasmic vesicle part; GO:0032991 macromolecular complex;…	GO:0050839 cell adhesion molecule binding; GO:0042802 identical protein binding; GO:0030674 protein binding, bridging; GO:0005102 receptor binding; GO:0042803 protein homodimerization activity; GO:0005488 binding; GO:0043167 ion binding; GO:0046983 protein dimerization activity; GO:0046872 metal ion binding; GO:0043169 cation binding; GO:0005515 protein binding; GO:0060090 binding, bridging; GO:0…	K03905	FGG; fibrinogen gamma chain	hsa04610 Complement and coagulation cascades - Homo sapiens (human); hsa04611 Platelet activation - Homo sapiens (human); hsa05150 Staphylococcus aureus infection - Homo sapiens (human);	IPR002181; IPR012290; IPR014716; IPR014715;	Fibrinogen, alpha/beta/gamma chain, C-terminal globular domain; Fibrinogen, alpha/beta/gamma chain, coiled coil domain; Fibrinogen, alpha/beta/gamma chain, C-terminal globular, subdomain 1; Fibrinogen, alpha/beta/gamma chain, C-terminal globular, subdomain 2;
P14314	Glucosidase 2 subunit beta OS=Homo sapiens OX=9606 GN=PRKCSH PE=1 SV=2	0.606	Down	0.00031964	PRKCSH	59.425	1.105	1.189	1.039	0.697	0.668	0.654	extracellular	GO:0050794 regulation of cellular process; GO:0044700 single organism signaling; GO:0051716 cellular response to stimulus; GO:0035556 intracellular signal transduction; GO:0009100 glycoprotein metabolic process; GO:0044699 single-organism process; GO:0044238 primary metabolic process; GO:0023052 signaling; GO:0050896 response to stimulus; GO:0044237 cellular metabolic process; GO:0071704 organic …	GO:0005788 endoplasmic reticulum lumen; GO:0043229 intracellular organelle; GO:0005783 endoplasmic reticulum; GO:0005737 cytoplasm; GO:0044446 intracellular organelle part; GO:0012505 endomembrane system; GO:0044424 intracellular part; GO:0005623 cell; GO:0044422 organelle part; GO:0043226 organelle; GO:0043231 intracellular membrane-bounded organelle; GO:0031974 membrane-enclosed lumen; GO:00700…	GO:0005488 binding; GO:0019901 protein kinase binding; GO:0043167 ion binding; GO:0044325 ion channel binding; GO:0043169 cation binding; GO:0046872 metal ion binding; GO:0005080 protein kinase C binding; GO:0005515 protein binding; GO:0005509 calcium ion binding; GO:0019900 kinase binding; GO:0019899 enzyme binding; GO:0051219 phosphoprotein binding;	K08288	PRKCSH; protein kinase C substrate 80K-H	hsa04141 Protein processing in endoplasmic reticulum - Homo sapiens (human);	IPR011992; IPR009011; IPR002048; IPR028146;	EF-hand domain pair; Mannose-6-phosphate receptor binding domain; EF-hand domain; Glucosidase II beta subunit, N-terminal;
P36980	Complement factor H-related protein 2 OS=Homo sapiens OX=9606 GN=CFHR2 PE=1 SV=1	0.672	Down	0.0102203	CFHR2	30.65	1.156	1.088	1.079	0.698	0.66	0.874	extracellular		GO:0005576 extracellular region;					IPR000436;	Sushi/SCR/CCP domain;
Q9H9J4	Ubiquitin carboxyl-terminal hydrolase 42 OS=Homo sapiens OX=9606 GN=USP42 PE=1 SV=3	0.13	Down	0.00165918	USP42	145.39	2.236	2.008		0.259	0.294		nucleus	GO:0000003 reproduction; GO:0070646 protein modification by small protein removal; GO:0051603 proteolysis involved in cellular protein catabolic process; GO:0044257 cellular protein catabolic process; GO:0022414 reproductive process; GO:0048869 cellular developmental process; GO:0044267 cellular protein metabolic process; GO:0044699 single-organism process; GO:0016579 protein deubiquitination; GO…	GO:0043229 intracellular organelle; GO:0044446 intracellular organelle part; GO:0031981 nuclear lumen; GO:0044424 intracellular part; GO:0005623 cell; GO:0044422 organelle part; GO:0043226 organelle; GO:0043231 intracellular membrane-bounded organelle; GO:0031974 membrane-enclosed lumen; GO:0005654 nucleoplasm; GO:0005634 nucleus; GO:0070013 intracellular organelle lumen; GO:0044464 cell part; GO…	GO:0004843 thiol-dependent ubiquitin-specific protease activity; GO:0008233 peptidase activity; GO:0036459 thiol-dependent ubiquitinyl hydrolase activity; GO:0003824 catalytic activity; GO:0005488 binding; GO:0101005 ubiquitinyl hydrolase activity; GO:0070011 peptidase activity, acting on L-amino acid peptides; GO:0019783 ubiquitin-like protein-specific protease activity; GO:0005515 protein bindi…	K11855	USP36_42; ubiquitin carboxyl-terminal hydrolase 36/42 [EC:3.4.19.12]		IPR001394; IPR028889;	Peptidase C19, ubiquitin carboxyl-terminal hydrolase; Ubiquitin specific protease domain;
P04406	Glyceraldehyde-3-phosphate dehydrogenase OS=Homo sapiens OX=9606 GN=GAPDH PE=1 SV=3	0.323	Down	0.00086292	GAPDH	36.053	2.202	2.489	2.515	0.822	0.605	0.901	cytoplasm	GO:0065008 regulation of biological quality; GO:0009116 nucleoside metabolic process; GO:0006165 nucleoside diphosphate phosphorylation; GO:0019362 pyridine nucleotide metabolic process; GO:0070997 neuron death; GO:0006096 glycolytic process; GO:0010608 posttranscriptional regulation of gene expression; GO:0009185 ribonucleoside diphosphate metabolic process; GO:0071345 cellular response to cytok…	GO:0016020 membrane; GO:0044421 extracellular region part; GO:0031090 organelle membrane; GO:0071944 cell periphery; GO:0005737 cytoplasm; GO:0031982 vesicle; GO:0032991 macromolecular complex; GO:0044424 intracellular part; GO:0005623 cell; GO:0097452 GAIT complex; GO:0044422 organelle part; GO:0043228 non-membrane-bounded organelle; GO:0005856 cytoskeleton; GO:0070062 extracellular exosome; GO:…	GO:0016769 transferase activity, transferring nitrogenous groups; GO:1901265 nucleoside phosphate binding; GO:0016903 oxidoreductase activity, acting on the aldehyde or oxo group of donors; GO:0015631 tubulin binding; GO:0005515 protein binding; GO:0000166 nucleotide binding; GO:0048037 cofactor binding; GO:0016491 oxidoreductase activity; GO:0097159 organic cyclic compound binding; GO:1901363 he…	K00134	GAPDH, gapA; glyceraldehyde 3-phosphate dehydrogenase [EC:1.2.1.12]	hsa00010 Glycolysis / Gluconeogenesis - Homo sapiens (human); hsa01100 Metabolic pathways - Homo sapiens (human); hsa01200 Carbon metabolism - Homo sapiens (human); hsa01230 Biosynthesis of amino acids - Homo sapiens (human); hsa04066 HIF-1 signaling pathway - Homo sapiens (human); hsa05010 Alzheimer disease - Homo sapiens (human);	IPR020829; IPR016040; IPR020828;	Glyceraldehyde 3-phosphate dehydrogenase, catalytic domain; NAD(P)-binding domain; Glyceraldehyde 3-phosphate dehydrogenase, NAD(P) binding domain;
Q15582	Transforming growth factor-beta-induced protein ig-h3 OS=Homo sapiens OX=9606 GN=TGFBI PE=1 SV=1	0.768	Down	0.031223	TGFBI	74.68	1.325	1.3	1.295	0.911	1.046	1.055	extracellular	GO:0072359 circulatory system development; GO:0050794 regulation of cellular process; GO:0016043 cellular component organization; GO:0044707 single-multicellular organism process; GO:0007162 negative regulation of cell adhesion; GO:0051216 cartilage development; GO:0001568 blood vessel development; GO:0007601 visual perception; GO:0048869 cellular developmental process; GO:0044267 cellular protei…	GO:0016020 membrane; GO:0005615 extracellular space; GO:0044421 extracellular region part; GO:0071944 cell periphery; GO:0005737 cytoplasm; GO:0031982 vesicle; GO:0044424 intracellular part; GO:0005623 cell; GO:0044420 extracellular matrix component; GO:0044422 organelle part; GO:0005604 basement membrane; GO:0070062 extracellular exosome; GO:0005622 intracellular; GO:0044464 cell part; GO:009879…	GO:0050839 cell adhesion molecule binding; GO:0005102 receptor binding; GO:0005488 binding; GO:0044877 macromolecular complex binding; GO:0005518 collagen binding; GO:0005515 protein binding; GO:0005178 integrin binding; GO:0050840 extracellular matrix binding; GO:0032403 protein complex binding;	K19519	TGFBI, BIGH3; transforming growth factor-beta-induced protein		IPR011489; IPR000782;	EMI domain; FAS1 domain;
Q99879	Histone H2B type 1-M OS=Homo sapiens OX=9606 GN=HIST1H2BM PE=1 SV=3	0.112	Down	0.0041431	HIST1H2BM	13.989	2.594	3.908	4.086	0.707	0.226	0.248	nucleus	GO:0044085 cellular component biogenesis; GO:0016043 cellular component organization; GO:0034728 nucleosome organization; GO:0044267 cellular protein metabolic process; GO:0044237 cellular metabolic process; GO:0071704 organic substance metabolic process; GO:0006323 DNA packaging; GO:0008152 metabolic process; GO:0006334 nucleosome assembly; GO:0022607 cellular component assembly; GO:0065003 macr…	GO:0044421 extracellular region part; GO:0005737 cytoplasm; GO:0031982 vesicle; GO:0032991 macromolecular complex; GO:0044424 intracellular part; GO:0005623 cell; GO:0044422 organelle part; GO:0044427 chromosomal part; GO:0043228 non-membrane-bounded organelle; GO:0031974 membrane-enclosed lumen; GO:0070062 extracellular exosome; GO:0005654 nucleoplasm; GO:0070013 intracellular organelle lumen; G…	GO:0097159 organic cyclic compound binding; GO:1901363 heterocyclic compound binding; GO:0003677 DNA binding; GO:0046982 protein heterodimerization activity; GO:0005488 binding; GO:0046983 protein dimerization activity; GO:0003676 nucleic acid binding; GO:0005515 protein binding;	K11252	H2B; histone H2B	hsa05034 Alcoholism - Homo sapiens (human); hsa05203 Viral carcinogenesis - Homo sapiens (human); hsa05322 Systemic lupus erythematosus - Homo sapiens (human);	IPR009072; IPR007125;	Histone-fold; Histone H2A/H2B/H3;
P09603	Macrophage colony-stimulating factor 1 OS=Homo sapiens OX=9606 GN=CSF1 PE=1 SV=2	0.646	Down	0.006877	CSF1	60.179	1.071	1.191	1.29	0.845	0.673	0.777	extracellular	GO:0044700 single organism signaling; GO:0010744 positive regulation of macrophage derived foam cell differentiation; GO:0065008 regulation of biological quality; GO:1903975 regulation of glial cell migration; GO:0030335 positive regulation of cell migration; GO:0045321 leukocyte activation; GO:0032944 regulation of mononuclear cell proliferation; GO:0048732 gland development; GO:0032270 positive…	GO:0016020 membrane; GO:0005615 extracellular space; GO:0044421 extracellular region part; GO:0071944 cell periphery; GO:0005737 cytoplasm; GO:0031982 vesicle; GO:1990682 CSF1-CSF1R complex; GO:0031224 intrinsic component of membrane; GO:0032991 macromolecular complex; GO:0044424 intracellular part; GO:0005623 cell; GO:0016021 integral component of membrane; GO:0005576 extracellular region; GO:00…	GO:0008083 growth factor activity; GO:0005157 macrophage colony-stimulating factor receptor binding; GO:0005125 cytokine activity; GO:0042802 identical protein binding; GO:0005102 receptor binding; GO:0042803 protein homodimerization activity; GO:0005488 binding; GO:0046983 protein dimerization activity; GO:0005126 cytokine receptor binding; GO:0005515 protein binding;	K05453	CSF1, MCSF; macrophage colony-stimulating factor 1	hsa04010 MAPK signaling pathway - Homo sapiens (human); hsa04014 Ras signaling pathway - Homo sapiens (human); hsa04015 Rap1 signaling pathway - Homo sapiens (human); hsa04060 Cytokine-cytokine receptor interaction - Homo sapiens (human); hsa04151 PI3K-Akt signaling pathway - Homo sapiens (human); hsa04380 Osteoclast differentiation - Homo sapiens (human); hsa04640 Hematopoietic cell lineage - Ho…	IPR009079;	Four-helical cytokine-like, core;
P03951	Coagulation factor XI OS=Homo sapiens OX=9606 GN=F11 PE=1 SV=1	0.826	Down	0.033219	F11	70.108	1.202	1.047	1.044	0.85	0.968	0.901	extracellular	GO:0044707 single-multicellular organism process; GO:0007596 blood coagulation; GO:0065008 regulation of biological quality; GO:0030193 regulation of blood coagulation; GO:0051241 negative regulation of multicellular organismal process; GO:0044699 single-organism process; GO:0048519 negative regulation of biological process; GO:0016485 protein processing; GO:0080134 regulation of response to stre…	GO:0070062 extracellular exosome; GO:0043226 organelle; GO:0016020 membrane; GO:0005615 extracellular space; GO:0044421 extracellular region part; GO:0044464 cell part; GO:0071944 cell periphery; GO:0031982 vesicle; GO:1903561 extracellular vesicle; GO:0043227 membrane-bounded organelle; GO:0005623 cell; GO:0005576 extracellular region; GO:0043230 extracellular organelle; GO:0005886 plasma membra…	GO:0008238 exopeptidase activity; GO:0008233 peptidase activity; GO:0043167 ion binding; GO:0008236 serine-type peptidase activity; GO:0004177 aminopeptidase activity; GO:0016787 hydrolase activity; GO:0005515 protein binding; GO:0070008 serine-type exopeptidase activity; GO:0008201 heparin binding; GO:1901681 sulfur compound binding; GO:0070009 serine-type aminopeptidase activity; GO:0004252 ser…	K01323	F11; coagulation factor XI [EC:3.4.21.27]	hsa04610 Complement and coagulation cascades - Homo sapiens (human);	IPR009003; IPR000177; IPR003609; IPR001254;	Peptidase S1, PA clan; Apple domain; PAN/Apple domain; Serine proteases, trypsin domain;
A0A075B6I0	Immunoglobulin lambda variable 8-61 OS=Homo sapiens OX=9606 GN=IGLV8-61 PE=3 SV=7	0.49	Down	9.6387e-07	IGLV8-61	12.814	1.405	1.349	1.33	0.662	0.672	0.666	extracellular	GO:0002376 immune system process; GO:0006955 immune response; GO:0050896 response to stimulus; GO:0002377 immunoglobulin production; GO:0002440 production of molecular mediator of immune response; GO:0002250 adaptive immune response;	GO:0016020 membrane; GO:0005615 extracellular space; GO:0044421 extracellular region part; GO:0044464 cell part; GO:0071944 cell periphery; GO:0005623 cell; GO:0005576 extracellular region; GO:0005886 plasma membrane;	GO:0005515 protein binding; GO:0003823 antigen binding; GO:0005488 binding;	K09638	TMPRSS7; transmembrane protease serine 7 [EC:3.4.21.-]		IPR007110; IPR013783; IPR003599; IPR013106;	Immunoglobulin-like domain; Immunoglobulin-like fold; Immunoglobulin subtype; Immunoglobulin V-set domain;
Q9Y240	C-type lectin domain family 11 member A OS=Homo sapiens OX=9606 GN=CLEC11A PE=1 SV=1	0.628	Down	7.6992e-05	CLEC11A	35.694	1.232	1.134	1.175	0.721	0.752	0.751	mitochondria	GO:0050794 regulation of cellular process; GO:0050789 regulation of biological process; GO:0042127 regulation of cell proliferation; GO:0048522 positive regulation of cellular process; GO:0048518 positive regulation of biological process; GO:0065007 biological regulation; GO:0008284 positive regulation of cell proliferation;	GO:0005615 extracellular space; GO:0044421 extracellular region part; GO:0044464 cell part; GO:0005622 intracellular; GO:0005737 cytoplasm; GO:0044424 intracellular part; GO:0005623 cell; GO:0005576 extracellular region;	GO:0008083 growth factor activity; GO:0030246 carbohydrate binding; GO:0005515 protein binding; GO:0005102 receptor binding; GO:0005488 binding;	K17521	CLEC11A; C-type lectin domain family 11 member A		IPR001304; IPR016187; IPR016186;	C-type lectin-like; C-type lectin fold; C-type lectin-like/link domain;
Q16778	Histone H2B type 2-E OS=Homo sapiens OX=9606 GN=HIST2H2BE PE=1 SV=3	0.03	Down	0.01096	HIST2H2BE	13.92	3.83		4.724	0.173		0.084	nucleus	GO:0044085 cellular component biogenesis; GO:0016043 cellular component organization; GO:0034728 nucleosome organization; GO:0098542 defense response to other organism; GO:0006959 humoral immune response; GO:0043207 response to external biotic stimulus; GO:0050896 response to stimulus; GO:0051707 response to other organism; GO:0045087 innate immune response; GO:0009607 response to biotic stimulus…	GO:0005615 extracellular space; GO:0044421 extracellular region part; GO:0005737 cytoplasm; GO:0031982 vesicle; GO:0032991 macromolecular complex; GO:0044424 intracellular part; GO:0005623 cell; GO:0044422 organelle part; GO:0044427 chromosomal part; GO:0043228 non-membrane-bounded organelle; GO:0031974 membrane-enclosed lumen; GO:0070062 extracellular exosome; GO:0005654 nucleoplasm; GO:0070013 …	GO:0097159 organic cyclic compound binding; GO:1901363 heterocyclic compound binding; GO:0003677 DNA binding; GO:0046982 protein heterodimerization activity; GO:0005488 binding; GO:0046983 protein dimerization activity; GO:0003676 nucleic acid binding; GO:0005515 protein binding;	K11252	H2B; histone H2B	hsa05034 Alcoholism - Homo sapiens (human); hsa05203 Viral carcinogenesis - Homo sapiens (human); hsa05322 Systemic lupus erythematosus - Homo sapiens (human);	IPR009072; IPR007125;	Histone-fold; Histone H2A/H2B/H3;
P55056	Apolipoprotein C-IV OS=Homo sapiens OX=9606 GN=APOC4 PE=1 SV=1	0.741	Down	0.039502	APOC4	14.553	1.444	1.137	1.199	0.902	0.841	1.058	extracellular	GO:0065008 regulation of biological quality; GO:0010889 regulation of sequestering of triglyceride; GO:0044699 single-organism process; GO:0070328 triglyceride homeostasis; GO:0042157 lipoprotein metabolic process; GO:0071704 organic substance metabolic process; GO:0051234 establishment of localization; GO:0042592 homeostatic process; GO:0008152 metabolic process; GO:1902578 single-organism local…	GO:0044421 extracellular region part; GO:0005615 extracellular space; GO:0032994 protein-lipid complex; GO:1990777 lipoprotein particle; GO:0034358 plasma lipoprotein particle; GO:0034385 triglyceride-rich plasma lipoprotein particle; GO:0032991 macromolecular complex; GO:0034364 high-density lipoprotein particle; GO:0005576 extracellular region; GO:0034361 very-low-density lipoprotein particle;	GO:0005319 lipid transporter activity; GO:0022892 substrate-specific transporter activity; GO:0005215 transporter activity;
P14543	Nidogen-1 OS=Homo sapiens OX=9606 GN=NID1 PE=1 SV=3	0.62	Down	3.5073e-05	NID1	136.38	1.103	1.157	1.08	0.677	0.698	0.697	extracellular	GO:0016043 cellular component organization; GO:0044707 single-multicellular organism process; GO:0044699 single-organism process; GO:0072001 renal system development; GO:0032835 glomerulus development; GO:0071711 basement membrane organization; GO:0022610 biological adhesion; GO:0043062 extracellular structure organization; GO:0022617 extracellular matrix disassembly; GO:0007160 cell-matrix adhes…	GO:0005615 extracellular space; GO:0044421 extracellular region part; GO:0071944 cell periphery; GO:0031982 vesicle; GO:0005623 cell; GO:0044420 extracellular matrix component; GO:0005576 extracellular region; GO:0005604 basement membrane; GO:0005605 basal lamina; GO:0031012 extracellular matrix; GO:0043226 organelle; GO:0070062 extracellular exosome; GO:0044464 cell part; GO:1903561 extracellula…	GO:0043167 ion binding; GO:0044877 macromolecular complex binding; GO:0043394 proteoglycan binding; GO:0043237 laminin-1 binding; GO:0005515 protein binding; GO:0050840 extracellular matrix binding; GO:0097367 carbohydrate derivative binding; GO:0043236 laminin binding; GO:0005488 binding; GO:0046872 metal ion binding; GO:0043169 cation binding; GO:0005518 collagen binding; GO:0005509 calcium ion…	K06826	NID; nidogen (entactin)		IPR003886; IPR001881; IPR000742; IPR000716; IPR009030; IPR011042; IPR006605; IPR009017; IPR026823; IPR024731; IPR023413;	NIDO domain; EGF-like calcium-binding domain; EGF-like domain; Thyroglobulin type-1; Growth factor receptor cysteine-rich domain; Six-bladed beta-propeller, TolB-like; G2 nidogen/fibulin G2F; Green fluorescent protein; Complement Clr-like EGF domain; EGF domain; Green fluorescent protein-like;
P69905	Hemoglobin subunit alpha OS=Homo sapiens OX=9606 GN=HBA1 PE=1 SV=2	0.742	Down	0.0052376	HBA1	15.257	1.589	1.572	1.384	1.17	1.058	1.144	cytoplasm	GO:0044085 cellular component biogenesis; GO:0050794 regulation of cellular process; GO:0015671 oxygen transport; GO:0016043 cellular component organization; GO:0010941 regulation of cell death; GO:0015669 gas transport; GO:1901700 response to oxygen-containing compound; GO:0044699 single-organism process; GO:0050896 response to stimulus; GO:0044237 cellular metabolic process; GO:0051259 protein …	GO:0016020 membrane; GO:0005615 extracellular space; GO:0044421 extracellular region part; GO:0031410 cytoplasmic vesicle; GO:0015935 small ribosomal subunit; GO:0031982 vesicle; GO:0005737 cytoplasm; GO:0044433 cytoplasmic vesicle part; GO:0032991 macromolecular complex; GO:0044424 intracellular part; GO:0005623 cell; GO:0044422 organelle part; GO:0043228 non-membrane-bounded organelle; GO:00319…	GO:0097159 organic cyclic compound binding; GO:1901363 heterocyclic compound binding; GO:0020037 heme binding; GO:0005506 iron ion binding; GO:0046914 transition metal ion binding; GO:0019825 oxygen binding; GO:0005488 binding; GO:0043167 ion binding; GO:0022892 substrate-specific transporter activity; GO:0046872 metal ion binding; GO:0043169 cation binding; GO:0005515 protein binding; GO:0005344…	K13822	HBA; hemoglobin subunit alpha	hsa05143 African trypanosomiasis - Homo sapiens (human); hsa05144 Malaria - Homo sapiens (human);	IPR009050; IPR000971; IPR012292;	Globin-like; Globin; Globin/Protoglobin;
P05546	Heparin cofactor 2 OS=Homo sapiens OX=9606 GN=SERPIND1 PE=1 SV=3	1.783	Up	0.000140299	SERPIND1	57.07	0.742	0.713	0.719	1.241	1.242	1.394	extracellular	GO:0050794 regulation of cellular process; GO:0044707 single-multicellular organism process; GO:0007596 blood coagulation; GO:0065008 regulation of biological quality; GO:0010951 negative regulation of endopeptidase activity; GO:0060255 regulation of macromolecule metabolic process; GO:0044699 single-organism process; GO:0048523 negative regulation of cellular process; GO:0048519 negative regulat…	GO:0070062 extracellular exosome; GO:0043226 organelle; GO:0005615 extracellular space; GO:0044421 extracellular region part; GO:0031982 vesicle; GO:1903561 extracellular vesicle; GO:0043227 membrane-bounded organelle; GO:0005576 extracellular region; GO:0043230 extracellular organelle;	GO:0043167 ion binding; GO:0061134 peptidase regulator activity; GO:0008201 heparin binding; GO:0098772 molecular function regulator; GO:0004857 enzyme inhibitor activity; GO:1901681 sulfur compound binding; GO:0004866 endopeptidase inhibitor activity; GO:0004867 serine-type endopeptidase inhibitor activity; GO:0097367 carbohydrate derivative binding; GO:0030234 enzyme regulator activity; GO:0005…	K03912	SERPIND1, HCF2; heparin cofactor II	hsa04610 Complement and coagulation cascades - Homo sapiens (human);	IPR023796; IPR033831;	Serpin domain; Heparin cofactor II;
P07900	Heat shock protein HSP 90-alpha OS=Homo sapiens OX=9606 GN=HSP90AA1 PE=1 SV=5	0.372	Down	4.4768e-06	HSP90AA1	84.659	1.504	1.602	1.584	0.592	0.603	0.549	cytoplasm	GO:0044700 single organism signaling; GO:0044085 cellular component biogenesis; GO:0065008 regulation of biological quality; GO:0022613 ribonucleoprotein complex biogenesis; GO:0045321 leukocyte activation; GO:0045428 regulation of nitric oxide biosynthetic process; GO:0022618 ribonucleoprotein complex assembly; GO:0007166 cell surface receptor signaling pathway; GO:0051973 positive regulation of…	GO:0016020 membrane; GO:0034774 secretory granule lumen; GO:0044421 extracellular region part; GO:0031410 cytoplasmic vesicle; GO:0071944 cell periphery; GO:0032587 ruffle membrane; GO:0031982 vesicle; GO:0005737 cytoplasm; GO:0044433 cytoplasmic vesicle part; GO:0044424 intracellular part; GO:0005623 cell; GO:1904813 ficolin-1-rich granule lumen; GO:0044422 organelle part; GO:0048770 pigment gra…	GO:0030235 nitric-oxide synthase regulator activity; GO:1901265 nucleoside phosphate binding; GO:0016773 phosphotransferase activity, alcohol group as acceptor; GO:1990782 protein tyrosine kinase binding; GO:0070182 DNA polymerase binding; GO:0046983 protein dimerization activity; GO:0019901 protein kinase binding; GO:0016817 hydrolase activity, acting on acid anhydrides; GO:0004713 protein tyros…	K04079	HSP90A, htpG; molecular chaperone HtpG	hsa04141 Protein processing in endoplasmic reticulum - Homo sapiens (human); hsa04151 PI3K-Akt signaling pathway - Homo sapiens (human); hsa04217 Necroptosis - Homo sapiens (human); hsa04612 Antigen processing and presentation - Homo sapiens (human); hsa04621 NOD-like receptor signaling pathway - Homo sapiens (human); hsa04657 IL-17 signaling pathway - Homo sapiens (human); hsa04659 Th17 cell dif…	IPR020575; IPR020568; IPR003594;	Heat shock protein Hsp90, N-terminal; Ribosomal protein S5 domain 2-type fold; Histidine kinase-like ATPase, C-terminal domain;
P11277	"Spectrin beta chain, erythrocytic OS=Homo sapiens OX=9606 GN=SPTB PE=1 SV=5"	0.605	Down	0.0050581	SPTB	246.47		1.044	1.065		0.616	0.66	nucleus	GO:0044700 single organism signaling; GO:0030833 regulation of actin filament polymerization; GO:0065008 regulation of biological quality; GO:0030835 negative regulation of actin filament depolymerization; GO:0051129 negative regulation of cellular component organization; GO:0048869 cellular developmental process; GO:0048666 neuron development; GO:0044699 single-organism process; GO:0032989 cellu…	GO:0016020 membrane; GO:0005938 cell cortex; GO:0071944 cell periphery; GO:0005737 cytoplasm; GO:0099568 cytoplasmic region; GO:0030863 cortical cytoskeleton; GO:0031224 intrinsic component of membrane; GO:0032991 macromolecular complex; GO:0030864 cortical actin cytoskeleton; GO:0044424 intracellular part; GO:0005623 cell; GO:0009898 cytoplasmic side of plasma membrane; GO:0098562 cytoplasmic si…	GO:0051015 actin filament binding; GO:0008092 cytoskeletal protein binding; GO:0005085 guanyl-nucleotide exchange factor activity; GO:0005200 structural constituent of cytoskeleton; GO:0005488 binding; GO:0044877 macromolecular complex binding; GO:0003779 actin binding; GO:0005088 Ras guanyl-nucleotide exchange factor activity; GO:0005515 protein binding; GO:0098772 molecular function regulator; …	K06115	SPTB; spectrin beta		IPR001715;	Calponin homology domain;
P04275	von Willebrand factor OS=Homo sapiens OX=9606 GN=VWF PE=1 SV=4	1.578	Up	2.0422e-06	VWF	309.26	0.637	0.647	0.631	1.008	1.026	0.988	extracellular	GO:0044085 cellular component biogenesis; GO:0016043 cellular component organization; GO:0044707 single-multicellular organism process; GO:0007596 blood coagulation; GO:0065008 regulation of biological quality; GO:0051260 protein homooligomerization; GO:0002576 platelet degranulation; GO:0044699 single-organism process; GO:0050896 response to stimulus; GO:0007599 hemostasis; GO:0051234 establishm…	GO:0034774 secretory granule lumen; GO:0044421 extracellular region part; GO:0005783 endoplasmic reticulum; GO:0031410 cytoplasmic vesicle; GO:0031982 vesicle; GO:0005737 cytoplasm; GO:0044433 cytoplasmic vesicle part; GO:0044424 intracellular part; GO:0005623 cell; GO:0044422 organelle part; GO:0031974 membrane-enclosed lumen; GO:0070062 extracellular exosome; GO:0031983 vesicle lumen; GO:007001…	GO:0047485 protein N-terminus binding; GO:0019865 immunoglobulin binding; GO:0005102 receptor binding; GO:0051087 chaperone binding; GO:0046983 protein dimerization activity; GO:0044877 macromolecular complex binding; GO:0005515 protein binding; GO:0005178 integrin binding; GO:0002020 protease binding; GO:0050839 cell adhesion molecule binding; GO:0097367 carbohydrate derivative binding; GO:00428…	K03900	VWF; von Willebrand factor	hsa04151 PI3K-Akt signaling pathway - Homo sapiens (human); hsa04510 Focal adhesion - Homo sapiens (human); hsa04512 ECM-receptor interaction - Homo sapiens (human); hsa04610 Complement and coagulation cascades - Homo sapiens (human); hsa04611 Platelet activation - Homo sapiens (human); hsa05165 Human papillomavirus infection - Homo sapiens (human);	IPR014853; IPR032361; IPR002919; IPR001007; IPR001846; IPR002035; IPR006207;	Uncharacterised domain, cysteine-rich; von Willebrand factor, VWA N-terminal domain; Trypsin Inhibitor-like, cysteine rich domain; VWFC domain; von Willebrand factor, type D domain; von Willebrand factor, type A; Cystine knot, C-terminal;
Q5JRA6	Transport and Golgi organization protein 1 homolog OS=Homo sapiens OX=9606 GN=MIA3 PE=1 SV=1	0.462	Down	9.7814e-05	MIA3	213.7	1.37	1.283	1.418	0.663	0.636	0.58	endoplasmic reticulum	GO:0044085 cellular component biogenesis; GO:0030335 positive regulation of cell migration; GO:0035459 cargo loading into vesicle; GO:0040017 positive regulation of locomotion; GO:0044699 single-organism process; GO:0051668 localization within membrane; GO:0015031 protein transport; GO:0051234 establishment of localization; GO:0040013 negative regulation of locomotion; GO:0009611 response to woun…	GO:0043229 intracellular organelle; GO:0016020 membrane; GO:0042175 nuclear outer membrane-endoplasmic reticulum membrane network; GO:0005783 endoplasmic reticulum; GO:0098588 bounding membrane of organelle; GO:0031090 organelle membrane; GO:0044446 intracellular organelle part; GO:0005737 cytoplasm; GO:0000139 Golgi membrane; GO:0031224 intrinsic component of membrane; GO:0012505 endomembrane sy…	GO:0022892 substrate-specific transporter activity; GO:0005515 protein binding; GO:0042954 lipoprotein transporter activity; GO:0008565 protein transporter activity; GO:0005488 binding; GO:0005215 transporter activity;				IPR001452; IPR011511;	SH3 domain; Variant SH3 domain;
P05109	Protein S100-A8 OS=Homo sapiens OX=9606 GN=S100A8 PE=1 SV=1	0.119	Down	0.0026364	S100A8	10.834	3.1	3.221	3.243	0.391	0.305	0.442	mitochondria	GO:0044700 single organism signaling; GO:0065008 regulation of biological quality; GO:0010941 regulation of cell death; GO:0045321 leukocyte activation; GO:0032270 positive regulation of cellular protein metabolic process; GO:0070486 leukocyte aggregation; GO:0098542 defense response to other organism; GO:0002793 positive regulation of peptide secretion; GO:0031347 regulation of defense response;…	GO:0016020 membrane; GO:0034774 secretory granule lumen; GO:0005615 extracellular space; GO:0044421 extracellular region part; GO:0031410 cytoplasmic vesicle; GO:0071944 cell periphery; GO:0031982 vesicle; GO:0005737 cytoplasm; GO:0044433 cytoplasmic vesicle part; GO:0044424 intracellular part; GO:0005623 cell; GO:0044422 organelle part; GO:0043228 non-membrane-bounded organelle; GO:0005856 cytos…	GO:0036041 long-chain fatty acid binding; GO:0005102 receptor binding; GO:0050544 arachidonic acid binding; GO:0043167 ion binding; GO:0050543 icosatetraenoic acid binding; GO:0035325 Toll-like receptor binding; GO:0015631 tubulin binding; GO:0043177 organic acid binding; GO:0005515 protein binding; GO:0008270 zinc ion binding; GO:0033293 monocarboxylic acid binding; GO:0008092 cytoskeletal prote…	K21127	S100A8; protein S100-A8	hsa04657 IL-17 signaling pathway - Homo sapiens (human);	IPR002048; IPR011992; IPR013787;	EF-hand domain; EF-hand domain pair; S100/CaBP-9k-type, calcium binding, subdomain;
P80108	Phosphatidylinositol-glycan-specific phospholipase D OS=Homo sapiens OX=9606 GN=GPLD1 PE=1 SV=3	0.73	Down	0.00123907	GPLD1	92.335	1.305	1.268	1.252	0.96	0.864	0.969	extracellular	GO:0044700 single organism signaling; GO:0090130 tissue migration; GO:0010941 regulation of cell death; GO:0050796 regulation of insulin secretion; GO:0009891 positive regulation of biosynthetic process; GO:0044255 cellular lipid metabolic process; GO:0002793 positive regulation of peptide secretion; GO:0044237 cellular metabolic process; GO:0010594 regulation of endothelial cell migration; GO:00…	GO:0016020 membrane; GO:0005615 extracellular space; GO:0044421 extracellular region part; GO:0031090 organelle membrane; GO:0031982 vesicle; GO:0005737 cytoplasm; GO:0044424 intracellular part; GO:0005623 cell; GO:0044422 organelle part; GO:0005765 lysosomal membrane; GO:0070062 extracellular exosome; GO:0005622 intracellular; GO:0044464 cell part; GO:0098805 whole membrane; GO:0005764 lysosome;…	GO:0042578 phosphoric ester hydrolase activity; GO:0016247 channel regulator activity; GO:0003824 catalytic activity; GO:0016788 hydrolase activity, acting on ester bonds; GO:0004630 phospholipase D activity; GO:0004620 phospholipase activity; GO:0008081 phosphoric diester hydrolase activity; GO:0016787 hydrolase activity; GO:0004621 glycosylphosphatidylinositol phospholipase D activity; GO:00170…	K01127	E3.1.4.50; glycosylphosphatidylinositol phospholipase D [EC:3.1.4.50]	hsa00563 Glycosylphosphatidylinositol (GPI)-anchor biosynthesis - Homo sapiens (human); hsa01100 Metabolic pathways - Homo sapiens (human);	IPR029002;	Phospholipase C/D;
P04196	Histidine-rich glycoprotein OS=Homo sapiens OX=9606 GN=HRG PE=1 SV=1	1.707	Up	3.5547e-05	HRG	59.578	1.106	1.089	1.022	1.803	1.83	1.857	extracellular	GO:0010941 regulation of cell death; GO:0007596 blood coagulation; GO:0065008 regulation of biological quality; GO:0060491 regulation of cell projection assembly; GO:0098542 defense response to other organism; GO:2001026 regulation of endothelial cell chemotaxis; GO:0010594 regulation of endothelial cell migration; GO:0009607 response to biotic stimulus; GO:0008285 negative regulation of cell pro…	GO:0034774 secretory granule lumen; GO:0016020 membrane; GO:0005615 extracellular space; GO:0044421 extracellular region part; GO:0031410 cytoplasmic vesicle; GO:0071944 cell periphery; GO:0005737 cytoplasm; GO:0031982 vesicle; GO:0044433 cytoplasmic vesicle part; GO:0044424 intracellular part; GO:0036019 endolysosome; GO:0005623 cell; GO:0044422 organelle part; GO:0031974 membrane-enclosed lumen…	GO:0019865 immunoglobulin binding; GO:0005102 receptor binding; GO:0061134 peptidase regulator activity; GO:0005515 protein binding; GO:0004857 enzyme inhibitor activity; GO:0098772 molecular function regulator; GO:0008201 heparin binding; GO:0004869 cysteine-type endopeptidase inhibitor activity; GO:0097159 organic cyclic compound binding; GO:1901363 heterocyclic compound binding; GO:0020037 hem…				IPR000010;	Cystatin domain;
A0A0A0MT36	Immunoglobulin kappa variable 6D-21 OS=Homo sapiens OX=9606 GN=IGKV6D-21 PE=3 SV=1	0.532	Down	0.00134127	IGKV6D-21	12.34	1.284	1.311	1.38	0.789	0.72	0.607	extracellular	GO:0002376 immune system process; GO:0006955 immune response; GO:0050896 response to stimulus; GO:0002377 immunoglobulin production; GO:0002440 production of molecular mediator of immune response; GO:0002250 adaptive immune response;	GO:0016020 membrane; GO:0005615 extracellular space; GO:0044421 extracellular region part; GO:0044464 cell part; GO:0071944 cell periphery; GO:0005623 cell; GO:0005576 extracellular region; GO:0005886 plasma membrane;	GO:0005515 protein binding; GO:0003823 antigen binding; GO:0005488 binding;				IPR007110; IPR013783; IPR013106; IPR003599;	Immunoglobulin-like domain; Immunoglobulin-like fold; Immunoglobulin V-set domain; Immunoglobulin subtype;
Q9UGM5	Fetuin-B OS=Homo sapiens OX=9606 GN=FETUB PE=1 SV=2	1.683	Up	0.0069844	FETUB	42.054	1.039	0.812	1.012	1.413	1.772	1.634	extracellular	GO:0000003 reproduction; GO:0050794 regulation of cellular process; GO:0010951 negative regulation of endopeptidase activity; GO:0035036 sperm-egg recognition; GO:0022414 reproductive process; GO:0060255 regulation of macromolecule metabolic process; GO:0044699 single-organism process; GO:0009988 cell-cell recognition; GO:0048523 negative regulation of cellular process; GO:0048519 negative regula…	GO:0070062 extracellular exosome; GO:0043226 organelle; GO:0005615 extracellular space; GO:0044421 extracellular region part; GO:0031982 vesicle; GO:1903561 extracellular vesicle; GO:0043227 membrane-bounded organelle; GO:0005576 extracellular region; GO:0043230 extracellular organelle;	GO:0030234 enzyme regulator activity; GO:0030414 peptidase inhibitor activity; GO:0061134 peptidase regulator activity; GO:0061135 endopeptidase regulator activity; GO:0008191 metalloendopeptidase inhibitor activity; GO:0004857 enzyme inhibitor activity; GO:0098772 molecular function regulator; GO:0004866 endopeptidase inhibitor activity; GO:0004869 cysteine-type endopeptidase inhibitor activity;				IPR000010; IPR025764;	Cystatin domain; Fetuin-B-type cystatin domain;
Q86TY3	Armadillo-like helical domain-containing protein 4 OS=Homo sapiens OX=9606 GN=ARMH4 PE=1 SV=1	0.587	Down	0.0015355	ARMH4	84.172	1.047	1.093	1.06	0.626	0.701	0.553	extracellular		GO:0031224 intrinsic component of membrane; GO:0016020 membrane; GO:0016021 integral component of membrane; GO:0044425 membrane part;
